# Supplementary material
Source: publisher figshare collection journal article supplement (https://diabetesjournals.figshare.com/ndownloader/files/27741897)
Supplement: Supplementary file 1 [file 27741897]

## Sheet: Supplementary Table 3
Supplementary Table 3: GDM EWAS results for offspring
CpG	estimate	avgmvalue_meth	pvalue	se	fdr	cpg_chr	cpg_pos	Relation_to_Island	UCSC_RefGene_Name	UCSC_RefGene_Accession	UCSC_RefGene_Group
cg09637449	0.126051	4.56068	3.20524e-07	0.0243454	0.166764	chr10	73479754	OpenSea	C10orf105;C10orf105;CDH23	NM_001168390;NM_001164375;NM_022124	5'UTR;TSS200;Body
cg00002366	0.127423	3.93018	4.60247e-07	0.0249546	0.166764	chr4	91736935	OpenSea	CCSER1	NM_001145065	Body
cg08734703	0.140545	3.02882	3.08837e-06	0.029803	0.621271	chr11	78579577	OpenSea	ODZ4	NM_001098816	Body
cg10626959	0.114604	6.27903	3.48101e-06	0.0244341	0.621271	chr7	4800797	Island	FOXK1	NM_001037165	Body
cg05965334	-0.154544	-5.11021	4.73242e-06	0.0334187	0.621271	chr1	47082767	S_Shore	MOBKL2C	NM_201403	TSS1500
cg18800641	0.175663	4.30825	6.43527e-06	0.0385416	0.621271	chr6	168867541	OpenSea	SMOC2;SMOC2	NM_022138;NM_001166412	Body;Body
cg00845239	0.111589	5.58482	7.27931e-06	0.0246291	0.621271	chr3	155991271	OpenSea	KCNAB1;KCNAB1;KCNAB1	NM_001308217;NM_172160;NM_003471	Body;Body;Body
cg24691814	0.154958	-4.25006	7.60469e-06	0.0342739	0.621271	chr1	65673302	OpenSea	AK4;AK4;AK4	NM_001005353;NM_203464;NM_013410	Body;Body;Body
cg11433319	0.211648	-6.60749	7.71583e-06	0.0468457	0.621271	chr21	19617873	Island	CHODL	NM_024944	Body
cg08250528	0.174265	-8.08273	1.03076e-05	0.0391267	0.746962	chr12	54020482	S_Shore	ATF7;ATF7;ATF7;ATF7;ATF7	NM_001206683;NM_001130060;NM_001206682;NM_006856;NR_073163	TSS1500;TSS1500;TSS1500;TSS1500;TSS1500
cg24542194	0.0977153	5.73181	1.24976e-05	0.0221537	0.757763	chr22	46189283	OpenSea	ATXN10;ATXN10	NM_001167621;NM_013236	Body;Body
cg17259358	-0.234552	-6.67251	1.31683e-05	0.0533189	0.757763	chr6	99273385	S_Shore
cg24136563	-0.104772	4.80065	1.39234e-05	0.0238852	0.757763	chr17	79182182	N_Shore	AZI1;AZI1	NM_014984;NM_001009811	Body;Body
cg07861356	0.120114	4.37407	1.4725e-05	0.0274621	0.757763	chr14	35009506	S_Shore	EAPP	NM_018453	TSS1500
cg01866301	-0.0954546	5.83797	1.57945e-05	0.0219036	0.757763	chr9	120446042	OpenSea
cg04789536	0.115586	4.81736	1.67306e-05	0.0266029	0.757763	chr4	80005369	OpenSea	LINC01088	NR_038342	Body
cg07474477	0.131478	5.21008	1.87132e-05	0.0304393	0.760219	chr16	3027968	N_Shore	PKMYT1;PKMYT1	NM_004203;NM_182687	Body;Body
cg03601351	0.122082	4.62038	2.01422e-05	0.0283747	0.760219	chr3	190039021	N_Shore	CLDN1	NM_021101	Body
cg17221346	0.0967942	4.19222	2.02521e-05	0.0225038	0.760219	chr6	19437864	OpenSea
cg14132236	0.170772	-1.88576	2.19632e-05	0.0398757	0.760219	chr6	28984254	N_Shore
cg05221057	0.116241	-4.65849	2.33131e-05	0.0272301	0.760219	chr13	112711587	Island
cg15322661	0.10373	4.42875	2.36321e-05	0.0243173	0.760219	chr8	71066202	OpenSea	NCOA2	NM_006540	Body
cg11152884	-0.0969054	5.36066	2.46876e-05	0.0227712	0.760219	chr5	170850020	S_Shore	FGF18	NM_003862	Body
cg07312880	-0.167344	-4.51174	2.58375e-05	0.039421	0.760219	chr2	172430789	OpenSea
cg06433834	0.108767	4.50042	2.64893e-05	0.025657	0.760219	chr18	33738695	OpenSea	ELP2;ELP2;ELP2;ELP2;ELP2;ELP2;ELP2	NR_040110;NM_001242877;NM_001242876;NM_001242875;NM_018255;NM_001242878;NM_001242879	Body;Body;Body;Body;Body;Body;Body
cg21442419	-0.167542	4.18982	2.76301e-05	0.0396129	0.760219	chr1	2182373	OpenSea	SKI	NM_003036	Body
cg01319067	0.114314	4.92599	2.90478e-05	0.0271026	0.760219	chr6	169071534	OpenSea
cg20296524	-0.188627	-8.72679	3.03606e-05	0.0448312	0.760219	chr1	234614614	Island	TARBP1	NM_005646	1stExon
cg04807245	0.0947497	-3.4568	3.04226e-05	0.0225218	0.760219	chr16	28986660	Island	SPNS1;SPNS1;SPNS1;SPNS1;SPNS1	NM_001142450;NM_001142451;NM_001142449;NM_032038;NM_001142448	5'UTR;1stExon;1stExon;1stExon;Body
cg20003144	-0.10738	-6.18149	3.29118e-05	0.0256361	0.780377	chr7	4815086	Island	KIAA0415	NM_014855	TSS200
cg02675264	0.139058	-0.28876	3.47023e-05	0.033298	0.780377	chr6	28984246	N_Shore
cg21905229	-0.111962	-5.34562	3.50805e-05	0.0268261	0.780377	chr20	32031732	Island	SNTA1	NM_003098	TSS200
cg06769296	-0.19859	-7.01104	3.55367e-05	0.0476168	0.780377	chr11	133906761	Island	LOC100128239	NR_027276	Body
cg01099338	0.138632	2.96875	3.66668e-05	0.0332993	0.78151	chr7	118372311	OpenSea
cg12821702	0.075268	3.35667	4.03316e-05	0.0181777	0.812192	chr2	42165504	OpenSea
cg18380490	-0.157792	-5.37326	4.03478e-05	0.0381086	0.812192	chr1	11073227	Island	TARDBP	NM_007375	5'UTR
cg01626870	0.160052	-8.57917	4.37289e-05	0.0388335	0.814021	chr8	144911671	Island	PUF60;PUF60;PUF60;PUF60;PUF60;PUF60;PUF60;PUF60	NM_001136033;NM_001271100;NM_014281;NM_001271099;NM_001271098;NM_001271097;NM_001271096;NM_078480	TSS1500;TSS1500;TSS200;TSS200;TSS200;TSS200;TSS200;TSS200
cg03414757	0.114892	4.81816	4.46653e-05	0.0279105	0.814021	chr10	81966886	S_Shore	ANXA11;LINC00857	NM_001278407;NR_038464	TSS1500;TSS1500
cg27206926	0.121354	-5.50429	4.47496e-05	0.0294836	0.814021	chr5	153825421	Island	SAP30L;SAP30L;SAP30L;SAP30L;SAP30L-AS1	NM_024632;NM_001131063;NM_001131062;NR_024084;NR_037897	TSS200;TSS200;TSS200;TSS200;TSS200
cg02339197	-0.130347	4.61158	4.55171e-05	0.0316996	0.814021	chr4	47984349	OpenSea	CNGA1;LOC101927157;CNGA1	NM_001142564;NR_125879;NM_000087	TSS1500;Body;5'UTR
cg10770726	-0.116237	4.9227	4.60552e-05	0.0282873	0.814021	chr1	228462316	N_Shore	OBSCN;OBSCN	NM_052843;NM_001098623	Body;Body
cg10062193	-0.136442	-7.07625	4.79097e-05	0.0332807	0.816125	chr4	47533905	OpenSea	ATP10D	NM_020453	Body
cg11799430	0.0975284	5.41178	4.88227e-05	0.0238152	0.816125	chr1	54775105	OpenSea	SSBP3;SSBP3;SSBP3	NM_018070;NM_001009955;NM_145716	Body;Body;Body
cg10055501	-0.15084	-4.66059	4.95528e-05	0.0368652	0.816125	chr4	111540657	N_Shore	PITX2;PITX2;PITX2	NM_000325;NM_153426;NM_153427	Body;Body;Body
cg18507138	0.113787	-5.24516	5.33e-05	0.0279288	0.842896	chr3	26665242	N_Shore	LRRC3B	NM_052953	5'UTR
cg19523670	-0.0840673	3.63697	5.43111e-05	0.020657	0.842896	chr20	56184899	OpenSea	ZBP1;ZBP1;ZBP1	NM_001160418;NM_001160417;NM_030776	Body;Body;Body
cg22707207	0.09658	5.44163	5.46677e-05	0.0237408	0.842896	chr1	19040796	N_Shelf	PAX7;PAX7;PAX7	NM_013945;NM_002584;NM_001135254	Body;Body;Body
cg17760691	0.186067	-6.84769	5.74239e-05	0.0458715	0.865745	chr16	20397097	OpenSea	PDILT	NM_174924	Body
cg13022121	0.107616	5.10634	5.89539e-05	0.0265723	0.865745	chr6	33148386	OpenSea	COL11A2;COL11A2;COL11A2	NM_080679;NM_080681;NM_080680	Body;Body;Body
cg06103654	0.140261	-6.61641	6.02982e-05	0.0346796	0.865745	chr2	27072413	Island	DPYSL5	NM_020134	5'UTR
cg13644402	0.082184	3.64905	6.09284e-05	0.0203327	0.865745	chr1	25524172	OpenSea
cg00985115	0.141777	1.39128	6.68404e-05	0.0352722	0.872105	chr12	48592818	S_Shore
cg08692828	-0.0835396	4.98511	6.74693e-05	0.0207953	0.872105	chr7	99055790	OpenSea	ATP5J2;ATP5J2;ATP5J2;ATP5J2	NM_001003713;NM_001039178;NM_004889;NM_001003714	3'UTR;3'UTR;3'UTR;3'UTR
cg25100863	-0.0917075	5.95635	6.80089e-05	0.0228395	0.872105	chr3	3079097	OpenSea	CNTN4;CNTN4	NM_175613;NM_175607	Body;Body
cg13678693	-0.0841431	2.39367	6.81192e-05	0.0209576	0.872105	chr16	11277453	OpenSea
cg20932535	0.112236	3.18112	7.00238e-05	0.0280017	0.872105	chr1	19030288	OpenSea	PAX7;PAX7;PAX7	NM_013945;NM_002584;NM_001135254	Body;Body;Body
cg07620110	0.0814495	3.11895	7.12089e-05	0.0203414	0.872105	chr16	63495529	OpenSea
cg12793314	0.12482	5.43305	7.12223e-05	0.0311733	0.872105	chr6	52409436	OpenSea	TRAM2	NM_012288	Body
cg22553641	0.164539	-6.32185	7.15115e-05	0.041103	0.872105	chr7	100136710	Island	AGFG2	NM_006076	TSS200
cg15890400	0.121535	5.1688	7.2207e-05	0.0303781	0.872105	chr10	93461158	OpenSea
cg02463485	0.0790991	5.71428	7.41573e-05	0.0198034	0.880978	chr11	64078569	OpenSea	ESRRA;ESRRA;ESRRA	NM_001282451;NM_001282450;NM_004451	Body;Body;Body
cg05726013	-0.190967	-2.38479	7.95394e-05	0.048017	0.883037	chr4	139156827	OpenSea	SLC7A11	NM_014331	Body
cg04332513	0.139953	-6.40567	7.96797e-05	0.0351937	0.883037	chr3	122135059	Island	WDR5B	NM_019069	TSS200
cg10335159	0.0939014	5.20833	8.15224e-05	0.0236465	0.883037	chr3	170251073	OpenSea	SLC7A14	NM_020949	5'UTR
cg25720419	-0.177519	1.9908	8.46962e-05	0.0448093	0.883037	chr10	108626325	OpenSea	SORCS1;SORCS1;SORCS1;SORCS1;SORCS1;SORCS1	NM_001013031;NM_001206570;NM_052918;NM_001206572;NM_001206569;NM_001206571	Body;Body;Body;Body;Body;Body
cg01026855	0.110471	3.8801	8.53067e-05	0.0278974	0.883037	chr2	164498787	OpenSea	FIGN	NM_018086	Body
cg22614400	-0.0672372	3.69434	8.68047e-05	0.0169979	0.883037	chr7	100287136	S_Shore	GIGYF1	NM_022574	TSS1500
cg15291235	0.147795	-6.42596	8.70238e-05	0.0373692	0.883037	chr17	48172663	Island	PDK2	NM_002611	TSS200
cg13641317	0.191155	-4.04435	8.72575e-05	0.0483407	0.883037	chr3	127255552	OpenSea
cg22246741	0.0931029	5.61898	8.72652e-05	0.0235447	0.883037	chr13	40676888	OpenSea
cg14088584	0.0915136	4.79859	8.88897e-05	0.0231694	0.883037	chr6	128759186	OpenSea	PTPRK;PTPRK	NM_002844;NM_001135648	Body;Body
cg20229177	0.0921611	5.05423	9.1745e-05	0.0233795	0.883037	chr12	15717479	OpenSea	PTPRO;PTPRO;PTPRO;PTPRO;PTPRO;PTPRO	NM_002848;NM_030667;NM_030671;NM_030670;NM_030669;NM_030668	Body;Body;Body;Body;Body;Body
cg07038098	0.108512	-6.01459	9.34079e-05	0.0275585	0.883037	chr16	50727439	OpenSea
cg18669213	0.0801944	5.9333	9.63643e-05	0.0204066	0.883037	chr1	226559563	OpenSea	PARP1	NM_001618	Body
cg03781727	-0.146837	-7.30107	9.68809e-05	0.0373774	0.883037	chr7	22007540	OpenSea
cg15311141	0.116688	3.38621	9.87231e-05	0.0297382	0.883037	chr4	36280631	OpenSea
cg03346521	0.078422	0.89618	9.92601e-05	0.019993	0.883037	chr4	7740503	OpenSea	SORCS2	NM_020777	Body
cg13764927	0.116949	4.07302	9.95987e-05	0.0298215	0.883037	chr6	168553516	OpenSea
cg10408410	-0.0955016	5.39403	9.98324e-05	0.0243561	0.883037	chr15	89765425	OpenSea	RLBP1	NM_000326	TSS1500
cg03399048	0.133781	3.35403	0.000100203	0.0341267	0.883037	chr7	158180335	OpenSea	PTPRN2;PTPRN2;PTPRN2;PTPRN2;PTPRN2	NM_001308268;NM_002847;NM_130843;NM_130842;NM_001308267	Body;Body;Body;Body;Body
cg20906206	0.133844	-6.73701	0.000100773	0.0341549	0.883037	chr14	54976551	Island	CGRRF1	NM_006568	TSS200
cg05144778	-0.086697	6.16997	0.000101604	0.0221353	0.883037	chr10	70406431	OpenSea	TET1	NM_030625	Body
cg19556583	0.114915	4.54569	0.000102003	0.0293472	0.883037	chr14	61847727	OpenSea	PRKCH	NM_006255	Body
cg19941446	0.152596	2.28436	0.000102357	0.0389786	0.883037	chr11	33079565	OpenSea	TCP11L1;TCP11L1	NM_018393;NM_001145541	Body;Body
cg25739400	0.0899238	2.27022	0.000108764	0.0230588	0.906274	chr5	117049375	OpenSea
cg11189532	-0.136801	-6.3373	0.000109829	0.0351014	0.906274	chr1	33351946	Island	HPCA	NM_002143	TSS200
cg26361780	-0.0893537	5.82327	0.000111494	0.022949	0.906274	chr3	148545789	OpenSea	CPB1	NM_001871	Body
cg00985388	-0.0774169	0.347037	0.000111668	0.0198852	0.906274	chr3	183952212	S_Shelf	VWA5B2	NM_138345	Body
cg10391228	0.156939	4.4162	0.000112137	0.040322	0.906274	chr8	59222640	OpenSea
cg25556087	0.0995265	3.2492	0.000113962	0.0255977	0.906274	chr20	8126124	OpenSea	PLCB1;PLCB1	NM_182734;NM_015192	Body;Body
cg11815984	0.0949182	4.82139	0.000114655	0.0244219	0.906274	chr6	158921186	OpenSea	TULP4;TULP4	NM_020245;NM_001007466	Body;Body
cg18993312	0.0802288	6.15253	0.000115055	0.0206471	0.906274	chr1	45924861	OpenSea	TESK2	NM_007170	5'UTR
cg03037879	-0.0702277	3.30341	0.000118777	0.0181104	0.918489	chr12	29650954	OpenSea	OVCH1	NM_183378	TSS1500
cg24715100	-0.0945677	5.57872	0.000120319	0.0244075	0.918489	chr6	33232182	OpenSea	VPS52	NM_022553	Body
cg27266027	0.14158	-8.36589	0.000120563	0.036546	0.918489	chr21	40555129	Island	PSMG1;PSMG1	NM_203433;NM_003720	Body;Body
cg14631438	0.0796184	3.18765	0.000121908	0.0205666	0.918489	chr11	128732986	OpenSea	KCNJ1;KCNJ1;KCNJ1;KCNJ1	NM_153765;NM_153766;NM_153764;NM_153767	5'UTR;5'UTR;5'UTR;5'UTR
cg18367020	-0.104417	-5.75404	0.000126928	0.0270434	0.918489	chr2	73461259	Island	CCT7;CCT7;CCT7;C2orf7;CCT7;CCT7;CCT7	NR_029402;NM_001166285;NM_006429;NM_032319;NM_001009570;NR_029403;NM_001166284	TSS200;TSS200;TSS200;TSS1500;TSS200;TSS200;TSS200
cg06161099	-0.141511	4.48777	0.000132457	0.0367525	0.918489	chr4	7973701	OpenSea	ABLIM2;ABLIM2;ABLIM2;ABLIM2;ABLIM2;ABLIM2	NM_032432;NM_001130083;NM_001130087;NM_001130084;NM_001130085;NM_001130086	Body;Body;Body;Body;Body;Body
cg17500577	0.144573	1.77544	0.000133846	0.0375732	0.918489	chr8	33462186	OpenSea
cg14118839	0.101336	5.74788	0.000135208	0.0263537	0.918489	chr10	36711931	OpenSea
cg00423826	-0.132193	-6.22441	0.000135564	0.0343846	0.918489	chr8	143534636	N_Shore
cg04180726	-0.0813882	5.01071	0.000136417	0.0211785	0.918489	chr16	3729605	OpenSea	TRAP1;TRAP1	NM_016292;NM_001272049	Body;Body
cg07128846	0.120873	2.5303	0.000136524	0.0314548	0.918489	chr3	116476085	OpenSea
cg15387301	0.0760877	5.61599	0.000137537	0.0198099	0.918489	chr4	82386848	OpenSea	RASGEF1B;RASGEF1B;RASGEF1B	NM_001300735;NM_001300736;NM_152545	5'UTR;5'UTR;5'UTR
cg16435469	0.0793406	5.79674	0.000138184	0.0206632	0.918489	chr2	150223994	OpenSea	LYPD6	NM_194317	5'UTR
cg23397741	-0.142328	-6.12901	0.000142681	0.0371456	0.918489	chr17	35014588	Island
cg09509553	0.0927966	5.36825	0.00014457	0.0242397	0.918489	chr1	240986512	N_Shore	RGS7	NM_002924	Body
cg22268248	0.0833203	5.71253	0.000144638	0.021765	0.918489	chr10	121589088	OpenSea	MCMBP;MCMBP;MCMBP	NM_024834;NM_001256378;NM_001256379	3'UTR;3'UTR;3'UTR
cg09517106	-0.159713	-7.30548	0.000144785	0.0417231	0.918489	chr1	198904195	OpenSea
cg04002235	0.17605	2.95986	0.000146259	0.0460219	0.918489	chr11	128560443	Island
cg02634507	0.125842	4.61838	0.000147646	0.0329174	0.918489	chr11	6805810	OpenSea	OR2AG1	NM_001004489	TSS1500
cg08130132	0.104653	4.72703	0.000148118	0.0273807	0.918489	chr11	112870762	OpenSea	NCAM1;NCAM1;NCAM1;NCAM1;NCAM1	NM_001076682;NM_001242608;NM_000615;NM_181351;NM_001242607	Body;Body;Body;Body;Body
cg19572157	0.0861903	3.81081	0.000148571	0.0225548	0.918489	chr2	75734281	OpenSea	FAM176A;FAM176A	NM_001135032;NM_032181	Body;Body
cg01524894	0.184164	2.54198	0.00014978	0.0482189	0.918489	chr5	140212752	N_Shore	PCDHA6;PCDHA2;PCDHA1;PCDHA7;PCDHA1;PCDHA7;PCDHA6;PCDHA5;PCDHA3;PCDHA4	NM_031849;NM_018905;NM_031411;NM_031852;NM_018900;NM_018910;NM_018909;NM_018908;NM_018906;NM_018907	Body;Body;Body;TSS1500;Body;TSS1500;Body;Body;Body;Body
cg19088627	0.0939769	4.6239	0.000151271	0.0246218	0.918489	chr1	107749196	OpenSea	NTNG1;NTNG1;NTNG1	NM_014917;NM_001113228;NM_001113226	Body;Body;Body
cg07338464	-0.0872387	4.68288	0.000151487	0.0228586	0.918489	chr5	148244123	OpenSea
cg12381873	-0.0788128	2.47822	0.000153199	0.0206663	0.918489	chr17	72270059	N_Shore	DNAI2	NM_023036	TSS1500
cg18280362	0.103548	-3.91	0.000155209	0.0271758	0.918489	chr4	48988066	Island	CWH43	NM_025087	TSS200
cg26164897	0.10152	4.41789	0.000155222	0.0266439	0.918489	chr4	20259899	S_Shelf	SLIT2	NM_004787	Body
cg14324370	0.227598	-8.14049	0.000156672	0.0597699	0.918489	chr2	177042789	Island
cg13363982	-0.180244	-5.66245	0.000157542	0.0473517	0.918489	chr1	37721104	OpenSea
cg06607140	0.0782071	6.37737	0.000158407	0.0205532	0.918489	chr9	71819016	OpenSea	TJP2;TJP2;TJP2;TJP2;TJP2;TJP2	NM_001170415;NM_001170416;NM_001170414;NM_001170630;NM_201629;NM_004817	TSS1500;TSS1500;5'UTR;Body;Body;Body
cg12372640	-0.0895419	5.04507	0.000159213	0.02354	0.918489	chr22	18924213	S_Shore	PRODH;PRODH	NM_016335;NM_001195226	TSS200;TSS1500
cg23050219	0.144368	-4.25745	0.000160704	0.0379772	0.918489	chr5	61572895	OpenSea
cg01906475	-0.170991	-2.51635	0.000160751	0.0449816	0.918489	chr12	104400793	OpenSea	GLT8D2	NM_031302	Body
cg06727578	0.171845	3.98265	0.00016454	0.0452768	0.918489	chr11	98438938	OpenSea
cg22849917	-0.0796505	4.28483	0.000164837	0.0209884	0.918489	chr11	77916095	OpenSea	USP35	NM_020798	Body
cg22542901	0.0793741	4.61142	0.000166034	0.0209258	0.918489	chr12	68052319	OpenSea	DYRK2;DYRK2	NM_006482;NM_003583	Body;Body
cg05207730	0.124003	-0.65339	0.000166594	0.032699	0.918489	chr11	116797991	OpenSea	SIK3;SIK3;SIK3	NM_001281748;NM_001281749;NM_025164	Body;Body;Body
cg19563452	-0.102607	4.14554	0.000166668	0.0270577	0.918489	chr11	3187939	S_Shore	OSBPL5;OSBPL5;OSBPL5	NM_001144063;NM_020896;NM_145638	TSS1500;TSS1500;TSS1500
cg03678062	0.0989019	-1.2588	0.000168824	0.0261032	0.918489	chr6	149772716	Island	ZC3H12D	NM_207360	Body
cg00879840	-0.0827749	5.07862	0.000169194	0.0218501	0.918489	chr16	78323024	OpenSea	WWOX	NM_016373	Body
cg14692757	-0.0972141	5.69747	0.000169476	0.0256645	0.918489	chr10	121671605	OpenSea	SEC23IP;SEC23IP	NR_037771;NM_007190	Body;Body
cg12700904	-0.180149	-7.91627	0.000169839	0.047566	0.918489	chr3	13590720	Island	FBLN2;FBLN2	NM_001004019;NM_001998	5'UTR;5'UTR
cg12236857	0.050423	-1.54218	0.000175229	0.0133417	0.934177	chr10	88136645	Island
cg02604403	-0.202495	-3.05906	0.000176886	0.0536133	0.934177	chr21	29708812	OpenSea
cg02524205	0.200357	0.862103	0.000178911	0.0530882	0.934177	chr6	167559851	OpenSea
cg03847470	0.153064	-2.07183	0.000179117	0.0405603	0.934177	chr11	128556580	N_Shelf	FLI1;FLI1	NM_001271012;NM_001271012	1stExon;5'UTR
cg09713125	0.0938387	5.0157	0.000180266	0.024877	0.934177	chr7	45077876	OpenSea	CCM2;CCM2;CCM2;CCM2;CCM2	NR_030770;NM_001167935;NM_001167934;NM_031443;NM_001029835	Body;Body;Body;Body;Body
cg19063061	0.158267	-5.31778	0.000181378	0.0419747	0.934177	chr19	49935893	Island	SLC17A7	NM_020309	Body
cg17765885	-0.126275	-6.63429	0.000181764	0.0334947	0.934177	chr7	128002356	S_Shore	PRRT4	NM_001114726	TSS1500
cg22143274	0.0885562	5.12476	0.000184495	0.0235137	0.937087	chr5	51339709	OpenSea
cg05851542	-0.127488	4.9513	0.000184916	0.0338562	0.937087	chr3	9989156	Island	PRRT3	NM_207351	Body
cg10991475	0.0695174	0.934827	0.000186473	0.0184719	0.938079	chr11	134651602	OpenSea
cg15473186	-0.17014	-4.8375	0.000188448	0.0452414	0.938079	chr3	53530075	Island	CACNA1D;CACNA1D;CACNA1D	NM_001128839;NM_000720;NM_001128840	Body;Body;Body
cg08870183	-0.136071	5.53461	0.000188996	0.0361893	0.938079	chr5	138440656	OpenSea	SIL1;SIL1	NM_022464;NM_001037633	Body;Body
cg06351457	-0.170603	-8.72106	0.000190599	0.0453997	0.939602	chr16	53088902	Island	CHD9	NM_025134	TSS200
cg26622895	0.133941	3.15534	0.00019519	0.0357016	0.955732	chr12	101605465	S_Shore	SLC5A8	NM_145913	TSS1500
cg20323934	0.0921179	5.55547	0.000199709	0.0245925	0.971297	chr21	35190823	OpenSea	ITSN1;ITSN1	NM_001001132;NM_003024	Body;Body
cg05610131	0.0657975	0.524541	0.000201254	0.0175751	0.972288	chr13	112870576	OpenSea
cg16646261	-0.0928431	5.53447	0.000204172	0.0248238	0.974085	chr10	61630568	OpenSea	CCDC6	NM_005436	Body
cg03135081	-0.18907	2.31663	0.000206507	0.0505921	0.974085	chr2	1584005	OpenSea
cg26306522	0.120715	5.65154	0.000212149	0.0323619	0.974085	chr16	30467696	OpenSea
cg23937608	-0.0744349	4.57546	0.000212833	0.0199593	0.974085	chr12	49317231	N_Shore	FKBP11;FKBP11;FKBP11	NM_016594;NM_001143782;NM_001143781	Body;3'UTR;Body
cg18826381	-0.169029	-7.94508	0.000213813	0.0453384	0.974085	chr3	155571296	N_Shore	SLC33A1;SLC33A1	NM_004733;NM_001190992	1stExon;1stExon
cg04575263	0.114505	-6.54741	0.000216227	0.0307377	0.974085	chr1	110882079	Island	RBM15	NM_022768	1stExon
cg00723541	0.0841519	5.2152	0.000216984	0.0225951	0.974085	chr19	44660449	OpenSea	ZNF234;ZNF234	NM_001144824;NM_006630	Body;Body
cg04342999	0.126556	-8.64114	0.000219455	0.0340075	0.974085	chr5	138629163	Island	MATR3;MATR3	NM_018834;NM_199189	TSS200;5'UTR
cg03399945	-0.156789	-5.90934	0.000220858	0.0421505	0.974085	chr13	54357026	OpenSea
cg11952622	-0.166036	-6.25656	0.000225375	0.0446993	0.974085	chr19	58962976	Island	ZNF324B;ZNF324B	NM_207395;NM_207395	1stExon;5'UTR
cg21155759	0.171901	2.2448	0.000227285	0.0463056	0.974085	chr5	49616004	OpenSea
cg19990386	0.0867053	4.86841	0.000228247	0.023363	0.974085	chr1	101326328	OpenSea
cg20491838	-0.118283	-4.11826	0.000232401	0.031912	0.974085	chr6	1611451	Island	FOXC1	NM_001453	1stExon
cg00526032	-0.0720715	4.37211	0.000235409	0.019462	0.974085	chr2	1204055	OpenSea	SNTG2	NM_018968	Body
cg14934596	-0.154886	6.04088	0.000236222	0.0418352	0.974085	chr3	98641854	OpenSea
cg03160005	0.0982159	5.63178	0.000237304	0.026537	0.974085	chr14	51303308	OpenSea
cg06182923	0.144247	0.47995	0.00023919	0.0389958	0.974085	chr1	33985406	OpenSea	CSMD2	NM_052896	Body
cg09729788	0.0923963	3.98347	0.000242193	0.0250005	0.974085	chr18	46995259	OpenSea
cg17682142	0.0852356	5.81215	0.000244797	0.0230803	0.974085	chr22	30005590	OpenSea	NF2;NF2;NF2;NF2;NF2;NF2;NF2;NF2;NF2	NM_181829;NM_181828;NM_181825;NM_181832;NM_181831;NM_181830;NM_016418;NM_181833;NM_000268	Body;Body;Body;Body;Body;Body;Body;Body;Body
cg17933812	0.100713	4.51487	0.00024581	0.0272794	0.974085	chr1	206259759	OpenSea	C1orf186	NM_001007544	5'UTR
cg02494279	0.0653076	0.0030521	0.000246226	0.0176914	0.974085	chr18	23395233	OpenSea
cg14160093	0.106988	2.99166	0.000246822	0.0289875	0.974085	chr6	112892805	OpenSea
cg21519202	0.0812602	-4.13014	0.000248246	0.0220257	0.974085	chr1	44399534	Island	ARTN;ARTN;ARTN;ARTN;ARTN;ARTN;ARTN	NM_057091;NM_057090;NM_057090;NM_001136215;NM_001136215;NM_057091;NM_003976	1stExon;1stExon;5'UTR;1stExon;5'UTR;5'UTR;TSS1500
cg00760067	-0.062516	3.74082	0.000248319	0.0169454	0.974085	chr1	3532130	S_Shelf
cg04818943	-0.152602	-5.21438	0.000249145	0.0413734	0.974085	chr16	90114200	OpenSea	LOC100130015;LOC100130015	NR_027335;NR_027336	TSS200;TSS200
cg14474846	0.0877892	4.91666	0.000253341	0.0238296	0.974085	chr11	100736799	OpenSea	ARHGAP42	NM_152432	Body
cg19296501	-0.0858817	4.28918	0.000254632	0.0233203	0.974085	chr4	1371045	OpenSea	KIAA1530	NM_020894	Body
cg14232108	0.103563	-1.29272	0.000255282	0.0281264	0.974085	chr9	33202784	OpenSea
cg05959346	0.114454	4.73726	0.000255394	0.0310853	0.974085	chr1	40102679	N_Shelf	HEYL	NM_014571	Body
cg08124553	-0.0878926	5.10518	0.000256669	0.0238798	0.974085	chr3	72844856	OpenSea	SHQ1	NM_018130	Body
cg18301062	0.092698	4.71194	0.000258863	0.0252007	0.974085	chr7	68915809	OpenSea
cg14604777	0.135775	-2.15259	0.000258974	0.0369125	0.974085	chr12	101988756	OpenSea	MYBPC1;MYBPC1;MYBPC1;MYBPC1;MYBPC1;MYBPC1;MYBPC1;MYBPC1	NM_206821;NM_206820;NM_206821;NM_206820;NM_002465;NM_002465;NM_206819;NM_206819	5'UTR;1stExon;1stExon;5'UTR;1stExon;5'UTR;1stExon;5'UTR
cg05234568	-0.272738	2.14973	0.000259825	0.0741655	0.974085	chr11	5960015	OpenSea
cg14349745	0.0885749	4.38249	0.000259914	0.0240867	0.974085	chr15	66129462	OpenSea
cg00903242	-0.223765	-5.80149	0.000261274	0.0608724	0.974085	chr3	238161	N_Shore	CHL1	NM_006614	TSS1500
cg18703975	-0.0944195	6.25434	0.000265088	0.0257122	0.974085	chr2	242665153	Island	ING5	NM_032329	3'UTR
cg26528107	-0.0743441	4.95484	0.000267395	0.0202578	0.974085	chr22	50144193	N_Shore
cg05327840	0.0751684	5.56417	0.000267445	0.0204827	0.974085	chr14	56690625	OpenSea	PELI2	NM_021255	Body
cg17561388	-0.0794915	5.78312	0.000268949	0.0216694	0.974085	chr10	76597509	OpenSea	KAT6B;KAT6B;KAT6B	NM_012330;NM_001256468;NM_001256469	5'UTR;5'UTR;5'UTR
cg10182095	-0.0906416	5.00318	0.000269029	0.0247094	0.974085	chr19	40330405	OpenSea	FBL	NM_001436	Body
cg12313892	0.0764901	4.99667	0.00026969	0.0208553	0.974085	chr15	70169052	OpenSea
cg08128889	0.0504082	5.90823	0.000270165	0.0137457	0.974085	chr17	80828176	Island	TBCD	NM_005993	Body
cg09540344	0.0770659	3.63218	0.000270774	0.0210183	0.974085	chr5	160726371	OpenSea	GABRB2;GABRB2	NM_000813;NM_021911	Body;Body
cg10231412	-0.145882	-6.09824	0.000272707	0.0398069	0.974085	chr3	194119060	S_Shore	GP5	NM_004488	5'UTR
cg09441873	0.0957945	-4.47986	0.000273455	0.0261446	0.974085	chr16	86320412	Island
cg15018592	-0.164525	-4.39448	0.000274878	0.0449196	0.974085	chr12	16501473	OpenSea	MGST1;MGST1;MGST1;MGST1;MGST1;MGST1;MGST1;MGST1	NM_145792;NM_001260511;NM_001260512;NM_001267598;NM_020300;NM_145791;NR_048545;NR_048547	5'UTR;5'UTR;5'UTR;5'UTR;5'UTR;5'UTR;Body;Body
cg16157821	0.12144	-7.18448	0.000275272	0.0331596	0.974085	chr3	58419758	Island	PDHB	NM_000925	TSS200
cg11490131	0.0773655	5.81163	0.000276652	0.0211325	0.974085	chr17	17124854	Island	FLCN;FLCN	NM_144997;NM_144606	Body;Body
cg17510606	-0.0590455	3.82216	0.000278331	0.0161354	0.974085	chr1	155282312	S_Shelf	FDPS;FDPS;FDPS;FDPS;FDPS	NM_001242825;NM_001135821;NM_002004;NM_001242824;NM_001135822	5'UTR;Body;Body;Body;Body
cg16883533	0.0885279	-4.91289	0.000282724	0.0242193	0.974085	chr12	7079667	Island	PHB2;EMG1;PHB2	NM_001144831;NM_006331;NM_007273	1stExon;TSS1500;1stExon
cg06461077	0.0954619	3.94176	0.000283369	0.0261206	0.974085	chr2	113765330	OpenSea	IL36A	NM_014440	Body
cg10508925	0.210334	4.8947	0.000283665	0.0575567	0.974085	chr5	124737474	OpenSea
cg10774656	0.118594	4.43918	0.000283887	0.0324545	0.974085	chr10	5553574	N_Shore
cg06544239	-0.111841	5.48431	0.00028584	0.0306216	0.974085	chr7	2800791	N_Shore	GNA12	NM_007353	Body
cg01807702	-0.0992017	5.91793	0.000289419	0.0271853	0.974085	chr17	1920029	OpenSea	RTN4RL1	NM_178568	Body
cg00498804	0.125396	2.18415	0.000289538	0.0343647	0.974085	chr11	8827626	OpenSea	ST5;ST5;ST5	NM_213618;NM_139157;NM_005418	5'UTR;5'UTR;5'UTR
cg18816826	0.080066	2.8078	0.00028968	0.0219427	0.974085	chr1	237168540	OpenSea
cg16966261	0.0802243	3.90814	0.000290116	0.0219885	0.974085	chr15	47874599	OpenSea
cg09301136	0.0905466	4.09011	0.000293326	0.0248375	0.974085	chr4	136293014	OpenSea
cg25620220	-0.0603431	4.59108	0.000293598	0.0165536	0.974085	chr11	62457325	S_Shore	LRRN4CL	NM_203422	TSS200
cg22269526	-0.158186	-7.20875	0.000294663	0.0434057	0.974085	chr2	47630224	Island	MSH2	NM_000251	TSS200
cg04713108	0.0924349	5.09908	0.000296025	0.0253723	0.974085	chr5	44807541	N_Shore	MRPS30	NM_016640	TSS1500
cg10192893	0.115123	-4.34143	0.000297326	0.03161	0.974085	chr4	41747895	Island	PHOX2B	NM_003924	Body
cg01993799	-0.128043	-7.10529	0.000297763	0.0351612	0.974085	chr5	177027141	Island	B4GALT7;B4GALT7	NM_007255;NM_007255	1stExon;5'UTR
cg06018791	0.100132	5.57837	0.000302242	0.0275264	0.974085	chr7	133080270	OpenSea	EXOC4;EXOC4	NM_001037126;NM_021807	Body;Body
cg21204778	0.0861798	3.93097	0.000303751	0.0236996	0.974085	chr22	40829673	OpenSea	MKL1;MKL1;MKL1;MKL1	NM_001282660;NM_020831;NM_001282661;NM_001282662	Body;Body;Body;Body
cg09109520	0.101317	-1.46821	0.00030748	0.027887	0.974085	chr16	57673258	OpenSea	GPR56;GPR56;GPR56;GPR56;GPR56;GPR56;GPR56;GPR56;GPR56	NM_001145773;NM_001145774;NM_005682;NM_001145771;NM_201525;NM_001145774;NM_201524;NM_001145772;NM_001145770	5'UTR;5'UTR;5'UTR;5'UTR;5'UTR;1stExon;5'UTR;5'UTR;5'UTR
cg09538002	-0.240151	-9.33676	0.000308877	0.0661225	0.974085	chr6	116575339	Island	TSPYL4	NM_021648	TSS200
cg27205487	0.101531	4.9955	0.000309172	0.0279573	0.974085	chr21	17961996	OpenSea	C21orf34;MIR125B2;C21orf34	NR_027790;NR_029694;NR_027791	Body;TSS1500;Body
cg12299931	0.123898	0.460054	0.000310791	0.0341289	0.974085	chr13	103940723	OpenSea
cg02137314	0.0575644	1.10605	0.000315818	0.0158753	0.974085	chr22	43665934	OpenSea	SCUBE1	NM_173050	Body
cg21268475	0.0608739	2.35549	0.000316367	0.0167901	0.974085	chr16	71089339	OpenSea	HYDIN;HYDIN;HYDIN;HYDIN	NM_001270974;NM_017558;NM_001198542;NM_001198543	Body;Body;Body;Body
cg10308396	0.0498314	1.74975	0.000317096	0.0137467	0.974085	chr17	76571121	OpenSea	DNAH17	NM_173628	Body
cg21721566	-0.129932	1.57623	0.000317133	0.035844	0.974085	chr12	121163144	N_Shore	ACADS	NM_000017	TSS1500
cg14173083	-0.184992	-8.88879	0.000318714	0.0510518	0.974085	chr2	201981068	Island	CFLAR;CFLAR;CFLAR;CFLAR;CFLAR;CFLAR;CFLAR;CFLAR;CFLAR;CFLAR;CFLAR;CFLAR	NM_001308043;NM_001202516;NM_001202517;NM_001202519;NM_003879;NM_001127184;NM_001308043;NM_001202516;NM_003879;NM_001127184;NM_001202517;NM_001202519	1stExon;1stExon;1stExon;1stExon;1stExon;1stExon;5'UTR;5'UTR;5'UTR;5'UTR;5'UTR;5'UTR
cg05179501	0.0914354	5.06955	0.000320495	0.0252435	0.974085	chr11	65633553	OpenSea	MUS81	NM_025128	3'UTR
cg00988187	0.0774879	1.97033	0.000321319	0.0213968	0.974085	chr6	164463323	OpenSea
cg06369248	-0.0678222	4.30296	0.000324323	0.0187406	0.974085	chr4	117519647	N_Shore
cg13697578	-0.0903128	5.6724	0.000326225	0.0249659	0.974085	chr5	108823677	OpenSea
cg13229958	0.0970018	4.636	0.000328929	0.0268313	0.974085	chr5	123740945	OpenSea	LINC01170	NR_125774	Body
cg02081925	0.0845454	5.49241	0.00033141	0.0233987	0.974085	chr5	176931394	Island	DOK3;DOK3;DOK3	NM_024872;NM_001144876;NM_001144875	Body;Body;Body
cg04213565	0.0981947	-2.20268	0.000336459	0.0272065	0.974085	chr5	35900039	OpenSea
cg20073609	-0.0822803	4.87559	0.000337174	0.0228007	0.974085	chr8	93696958	OpenSea
cg10355169	0.0792051	5.1522	0.000337786	0.0219515	0.974085	chr2	240611985	N_Shore
cg01461410	-0.129008	-7.40342	0.0003407	0.0357769	0.974085	chr6	85473773	Island	TBX18	NM_001080508	1stExon
cg23239407	0.0457047	1.35794	0.000342066	0.0126787	0.974085	chr17	40555473	N_Shore	PTRF	NM_012232	3'UTR
cg20655068	0.0559281	0.835532	0.000343166	0.0155184	0.974085	chr6	32188187	OpenSea	NOTCH4	NM_004557	Body
cg04420917	0.0595158	3.37386	0.000344598	0.016519	0.974085	chr19	39303993	OpenSea	LGALS4	NM_006149	TSS1500
cg19024165	0.083413	5.04432	0.000346496	0.0231612	0.974085	chr5	141531922	OpenSea	NDFIP1	NM_030571	3'UTR
cg25227364	-0.129271	-6.09462	0.000347014	0.0358986	0.974085	chr19	49217490	Island	MAMSTR;MAMSTR	NM_182574;NM_001130915	Body;Body
cg09041527	0.0492238	-0.907245	0.000349043	0.0136753	0.974085	chr8	11659497	N_Shore	FDFT1	NM_004462	TSS1500
cg26847753	-0.108812	-6.15434	0.000349276	0.0302315	0.974085	chr15	44119241	Island	WDR76;WDR76;WDR76	NM_001167941;NM_024908;NM_001167941	5'UTR;1stExon;1stExon
cg10965404	-0.179289	-7.15722	0.000351186	0.0498326	0.974085	chr1	192778197	Island	RGS2;RGS2	NM_002923;NM_002923	1stExon;5'UTR
cg10994793	0.111556	5.43876	0.000355393	0.0310337	0.974085	chr2	10215608	OpenSea	CYS1	NM_001037160	Body
cg21700079	0.0880997	5.18472	0.000355878	0.024511	0.974085	chr10	50678746	OpenSea	ERCC6	NM_000124	Body
cg13659991	-0.0891114	4.79393	0.000358488	0.0248059	0.974085	chr9	16500626	OpenSea	BNC2	NM_017637	Body
cg16650285	0.0938977	2.52258	0.000359396	0.0261432	0.974085	chr14	75921048	OpenSea	JDP2;JDP2;JDP2;JDP2	NM_001135049;NM_130469;NM_001135048;NM_001135047	Body;Body;Body;Body
cg22646782	-0.0848565	5.03908	0.000360053	0.0236292	0.974085	chr19	5152272	S_Shore	KDM4B	NM_015015	3'UTR
cg06690460	0.0865172	2.63631	0.000360481	0.0240937	0.974085	chr12	25406532	OpenSea
cg02204209	-0.0927103	5.53731	0.000362795	0.0258307	0.974085	chr15	67410524	OpenSea	SMAD3	NM_005902	Body
cg25687585	-0.0993789	1.00312	0.00036402	0.0276956	0.974085	chr5	42756950	OpenSea	CCDC152;CCDC152	NM_001134848;NM_001134848	1stExon;5'UTR
cg11170896	-0.105222	5.27534	0.000364554	0.0293272	0.974085	chr7	4266872	OpenSea	SDK1;SDK1	NR_027816;NM_152744	Body;Body
cg02947519	0.0713464	1.22558	0.000365022	0.0198874	0.974085	chr1	85619427	OpenSea
cg24234895	-0.0879794	4.88386	0.000365182	0.0245246	0.974085	chr3	111471037	OpenSea	PLCXD2;PHLDB2;PLCXD2	NM_153268;NM_001134437;NM_001185106	Body;5'UTR;3'UTR
cg04011414	0.0882446	4.20321	0.000365801	0.0246016	0.974085	chr11	13074999	OpenSea
cg13029706	0.1392	-7.93926	0.000366825	0.0388156	0.974085	chr7	11013526	Island	PHF14;PHF14;PHF14;PHF14	NM_001007157;NM_014660;NM_001007157;NM_014660	1stExon;5'UTR;5'UTR;1stExon
cg25942688	-0.0809369	5.61039	0.000367576	0.0225724	0.974085	chr2	27016730	OpenSea	CENPA;CENPA	NM_001042426;NM_001809	3'UTR;3'UTR
cg11375665	0.106732	4.65352	0.000367905	0.0297685	0.974085	chr18	61429307	OpenSea	SERPINB7	NM_001040147	5'UTR
cg11001085	-0.0751989	4.56867	0.000368679	0.0209769	0.974085	chr3	49940126	Island	MST1R	NM_002447	1stExon
cg20430200	0.0780676	3.99968	0.000369231	0.0217795	0.974085	chr6	146791445	OpenSea
cg27017658	-0.106297	-7.09053	0.000369911	0.0296591	0.974085	chr14	21093081	Island
cg16052202	0.0454594	-2.11306	0.000369963	0.0126843	0.974085	chr20	18268915	Island	ZNF133;ZNF133;ZNF133;ZNF133;ZNF133;ZNF133;ZNF133;ZNF133;ZNF133;ZNF133;ZNF133;ZNF133;ZNF133;ZNF133;ZNF133;ZNF133	NM_001282999;NM_001282998;NM_001282997;NM_001282996;NM_001282995;NM_003434;NM_001083330;NM_001283008;NM_001283007;NM_001283006;NM_001283005;NM_001283004;NM_001283003;NM_001283002;NM_001283001;NM_001283000	TSS200;TSS200;TSS200;TSS200;TSS200;TSS200;TSS200;TSS200;TSS200;TSS200;TSS200;TSS200;TSS200;TSS200;TSS200;TSS200
cg24289669	0.0834829	5.00367	0.000370074	0.0232942	0.974085	chr13	113866760	N_Shelf	CUL4A;CUL4A	NM_003589;NM_001008895	5'UTR;Body
cg05305107	0.0772485	5.85889	0.000371715	0.0215618	0.974085	chr2	242290688	OpenSea	SEPT2;SEPT2;SEPT2;SEPT2;SEPT2;SEPT2	NM_001282973;NM_001282972;NM_001008492;NM_001008491;NM_004404;NM_006155	3'UTR;3'UTR;3'UTR;3'UTR;3'UTR;3'UTR
cg00456950	0.0827703	5.23739	0.000371951	0.0231042	0.974085	chr10	33225100	OpenSea	ITGB1;ITGB1;ITGB1	NM_033668;NM_133376;NM_002211	TSS1500;5'UTR;5'UTR
cg16782236	-0.0833536	5.09707	0.000374395	0.0232784	0.974085	chr4	1321463	N_Shore	MAEA;MAEA	NM_005882;NM_001017405	Body;Body
cg01512876	-0.077456	5.51814	0.000375181	0.0216347	0.974085	chr6	103197191	OpenSea
cg14511800	0.0690644	-3.87077	0.000376554	0.0192961	0.974085	chr5	113696564	Island	KCNN2;KCNN2	NM_021614;NM_001278204	TSS1500;TSS1500
cg24084564	0.0637159	1.93238	0.000378459	0.0178085	0.974085	chr19	39892799	N_Shore
cg22372968	0.0960929	4.86537	0.000379009	0.0268607	0.974085	chr1	85224336	S_Shelf
cg24191189	-0.0865644	4.34775	0.000379514	0.0241996	0.974085	chr13	52139540	OpenSea
cg12796028	0.115973	-6.13866	0.000380365	0.0324265	0.974085	chr3	44040206	Island
cg19327213	0.0724876	-0.318181	0.000380473	0.0202682	0.974085	chr19	47988783	S_Shore	KPTN	NM_007059	TSS1500
cg10153638	0.0641833	0.589606	0.000380791	0.0179474	0.974085	chr3	156835317	N_Shelf	LINC00880	NR_034007	Body
cg15391057	0.103099	4.09419	0.000382842	0.0288409	0.974085	chr3	38017188	OpenSea	CTDSPL;CTDSPL;CTDSPL;CTDSPL	NM_005808;NM_001008392;NM_005808;NM_001008392	ExonBnd;ExonBnd;Body;Body
cg08863939	0.0667021	1.42777	0.000382913	0.0186595	0.974085	chr2	172067553	OpenSea	TLK1	NM_001136554	5'UTR
cg16010516	0.0484617	1.84625	0.000382996	0.013557	0.974085	chr10	134349958	N_Shore	INPP5A	NM_005539	TSS1500
cg06502285	0.0577968	0.492322	0.000384234	0.0161724	0.974085	chr12	31800017	OpenSea	METTL20	NM_001135864	TSS200
cg10496614	0.0715788	6.31098	0.00038459	0.0200302	0.974085	chr4	3263249	OpenSea	C4orf44	NM_001012982	Body
cg11725204	0.0757184	1.79389	0.000384962	0.0211902	0.974085	chr13	44925234	OpenSea
cg14468932	0.0896784	4.51852	0.000387245	0.0251081	0.974085	chr13	37961201	OpenSea
cg13247967	0.0904774	5.48509	0.000388524	0.0253381	0.974085	chr11	123487358	OpenSea	GRAMD1B	NM_020716	Body
cg08941771	-0.0788101	5.82253	0.000388529	0.0220707	0.974085	chr1	185601149	OpenSea
cg20784813	-0.0869921	2.97642	0.000389163	0.0243651	0.974085	chr1	21999106	S_Shelf
cg14089063	-0.0812672	4.11857	0.000390186	0.0227661	0.974085	chr15	41206842	OpenSea
cg16715237	0.136904	-2.52651	0.000390572	0.038355	0.974085	chr5	140165766	N_Shore	PCDHA1;PCDHA1;PCDHA1;PCDHA1;PCDHA1;PCDHA1	NM_031411;NM_018900;NM_031410;NM_031411;NM_018900;NM_031410	5'UTR;5'UTR;5'UTR;1stExon;1stExon;1stExon
cg23567690	0.0993453	1.98802	0.000392256	0.0278415	0.974085	chr17	55359418	OpenSea	MSI2;MSI2	NM_138962;NM_170721	Body;Body
cg08292624	0.0878451	5.09228	0.000392705	0.0246207	0.974085	chr18	32716848	OpenSea	MAPRE2;MAPRE2;MAPRE2;MAPRE2;MAPRE2	NM_001143826;NM_001143827;NR_046177;NM_014268;NM_001256420	Body;Body;Body;Body;Body
cg18442286	-0.133963	-6.43555	0.000394811	0.0375616	0.974085	chr11	59333608	OpenSea
cg04871131	0.203953	4.25987	0.000396218	0.0572013	0.974085	chr7	94954202	S_Shore	PON1	NM_000446	TSS1500
cg27514874	0.110517	4.29761	0.000399337	0.0310143	0.974085	chr16	20429506	OpenSea	ACSM5	NM_017888	Body
cg20709203	0.166341	-7.1331	0.000400206	0.0466876	0.974085	chr13	53174588	Island
cg16994149	0.0939654	5.72243	0.000401682	0.026381	0.974085	chr4	148989300	OpenSea	ARHGAP10	NM_024605	Body
cg14661400	0.146981	-4.38509	0.000402519	0.0412716	0.974085	chr12	121087360	OpenSea	CABP1;CABP1;CABP1	NM_031205;NM_004276;NM_001033677	TSS1500;TSS1500;Body
cg22619719	0.0583917	-2.78543	0.000403165	0.0163981	0.974085	chr1	1891578	OpenSea	KIAA1751	NM_001080484	Body
cg14190823	-0.0776779	6.2106	0.000403514	0.0218157	0.974085	chr2	12575216	OpenSea	LOC100506457	NR_110196	Body
cg23627145	0.120504	-6.97574	0.000403834	0.0338455	0.974085	chr2	146445284	OpenSea
cg15482831	0.14368	-6.98712	0.00040595	0.0403706	0.974085	chr16	68027306	Island	DPEP2	NM_022355	5'UTR
cg18110328	-0.129088	3.81519	0.000406281	0.0362728	0.974085	chr15	62575434	OpenSea
cg20456582	0.0703254	0.601154	0.000409192	0.0197717	0.974085	chr22	17762633	OpenSea
cg27030655	0.205448	5.06238	0.000411161	0.0577817	0.974085	chr13	111997466	OpenSea
cg21461955	0.0860266	3.97272	0.000411228	0.0241951	0.974085	chr1	88655702	OpenSea
cg02842385	0.102372	4.36844	0.000415012	0.0288122	0.974085	chr9	112790744	OpenSea	PALM2-AKAP2;PALM2-AKAP2	NM_007203;NM_147150	Body;Body
cg01288904	0.0809018	4.52777	0.000415148	0.0227701	0.974085	chr8	80947440	OpenSea	TPD52;TPD52;TPD52	NM_001025252;NM_001025253;NM_005079	3'UTR;3'UTR;3'UTR
cg21330727	-0.101549	4.34061	0.000419001	0.0286014	0.974085	chr17	38336206	S_Shore	RAPGEFL1	NM_016339	5'UTR
cg20093123	0.183886	1.45826	0.000419157	0.0517932	0.974085	chr13	103940854	OpenSea
cg03074946	0.0655395	2.16106	0.00042076	0.0184651	0.974085	chr12	120687694	OpenSea	PXN;PXN;PXN;PXN	NM_025157;NM_001080855;NM_025157;NM_002859	5'UTR;Body;1stExon;Body
cg08207170	-0.0888419	5.28834	0.000421692	0.0250346	0.974085	chr16	89885843	S_Shelf
cg17443252	0.123964	2.91317	0.000422941	0.0349395	0.974085	chr9	122257581	OpenSea
cg07654533	-0.0672922	6.28511	0.00042361	0.0189687	0.974085	chr8	31034694	OpenSea
cg25054963	-0.0869035	5.10234	0.000424511	0.0245007	0.974085	chr8	28924618	OpenSea
cg25591573	0.218613	-5.53873	0.000424656	0.0616354	0.974085	chr19	12476246	Island	ZNF442	NM_030824	5'UTR
cg08863953	0.187139	-5.64399	0.000428009	0.0527932	0.974085	chr10	22542444	Island
cg02019549	0.0974877	4.44937	0.000431367	0.0275183	0.974085	chr6	119602125	OpenSea	MAN1A1	NM_005907	Body
cg09829868	0.0932424	4.64595	0.000432388	0.0263247	0.974085	chr2	42237977	OpenSea
cg08368849	0.0762098	3.33688	0.000432571	0.0215167	0.974085	chr14	103663129	OpenSea
cg02197279	0.0753421	4.25386	0.000434081	0.0212773	0.974085	chr6	157955288	OpenSea	ZDHHC14;ZDHHC14	NM_153746;NM_024630	Body;Body
cg00619519	0.0622001	-2.69933	0.000434351	0.0175668	0.974085	chr1	10093261	Island	UBE4B;UBE4B;UBE4B;UBE4B	NM_001105562;NM_006048;NM_001105562;NM_006048	5'UTR;5'UTR;1stExon;1stExon
cg11014833	0.104748	-0.47057	0.000434573	0.0295844	0.974085	chr3	112192051	OpenSea	BTLA;BTLA	NM_001085357;NM_181780	Body;Body
cg18730266	0.0889538	3.10474	0.000434573	0.0251236	0.974085	chr2	192250764	OpenSea	MYO1B;MYO1B;MYO1B	NM_012223;NM_001161819;NM_001130158	Body;Body;Body
cg03621319	-0.0759538	6.28024	0.00043534	0.0214548	0.974085	chr12	109895809	OpenSea	KCTD10;KCTD10	NM_031954;NM_031954	ExonBnd;Body
cg02508525	-0.129623	-3.92407	0.000436928	0.0366251	0.974085	chr1	44229394	OpenSea	ST3GAL3;ST3GAL3;ST3GAL3;ST3GAL3;ST3GAL3;ST3GAL3;ST3GAL3;ST3GAL3;ST3GAL3;ST3GAL3;ST3GAL3;ST3GAL3;ST3GAL3;ST3GAL3;ST3GAL3;ST3GAL3;ST3GAL3;ST3GAL3;ST3GAL3;ST3GAL3;ST3GAL3;ST3GAL3;ST3GAL3;ST3GAL3;ST3GAL3	NR_073019;NR_073017;NR_073018;NR_073023;NR_073016;NR_073020;NR_073021;NM_001270465;NM_001270463;NM_001270464;NM_001270466;NM_174967;NM_174965;NM_174970;NM_174968;NM_174966;NM_174964;NM_174963;NM_006279;NM_001270459;NM_001270460;NM_001270461;NM_001270462;NM_174971;NM_174969	Body;Body;Body;Body;Body;Body;Body;Body;Body;Body;Body;Body;Body;Body;Body;Body;Body;Body;Body;Body;Body;Body;Body;Body;Body
cg21113478	0.0737816	1.28596	0.000438819	0.0208539	0.974085	chr3	36782467	OpenSea	DCLK3	NM_033403	TSS1500
cg03791828	0.0899136	4.37293	0.000439492	0.0254165	0.974085	chr4	105445815	OpenSea	LOC101929468	NR_125926	Body
cg02306995	0.097166	-3.16189	0.000439765	0.0274679	0.974085	chr3	122635049	S_Shelf	SEMA5B	NM_001031702	Body
cg07873924	-0.0867052	5.15919	0.000441036	0.0245162	0.974085	chr10	111638161	OpenSea	XPNPEP1;XPNPEP1;XPNPEP1	NR_030724;NM_001167604;NM_020383	Body;Body;Body
cg01023344	-0.141567	-6.53386	0.000441542	0.0400321	0.974085	chr14	60559061	Island	C14orf135;C14orf135	NM_022495;NM_022495	5'UTR;1stExon
cg16989443	0.0793218	5.18265	0.000442065	0.0224325	0.974085	chr1	1849195	N_Shore	TMEM52	NM_178545	3'UTR
cg07806480	0.0838365	3.75679	0.000442234	0.0237099	0.974085	chr8	41731379	N_Shelf	ANK1	NM_001142446	Body
cg27131973	-0.0891761	5.36801	0.000446425	0.0252383	0.975506	chr8	103317495	OpenSea	UBR5;UBR5	NM_001282873;NM_015902	Body;Body
cg05257260	0.141142	4.83548	0.000446542	0.0399461	0.975506	chr4	114561619	OpenSea	CAMK2D;CAMK2D;CAMK2D;CAMK2D;CAMK2D;CAMK2D	NM_172129;NM_172128;NM_172114;NM_172115;NM_001221;NM_172127	Body;Body;Body;Body;Body;Body
cg18406010	-0.0802877	4.91863	0.000446917	0.0227246	0.975506	chr14	51137626	S_Shelf
cg25736684	-0.105047	-0.248444	0.000452297	0.0297599	0.978475	chr15	46384297	OpenSea
cg25705717	0.340217	-1.61928	0.000454472	0.0964189	0.978475	chr10	27608719	Island
cg03555215	0.0739799	5.68581	0.000456307	0.0209727	0.978475	chr10	116086662	OpenSea	AFAP1L2;AFAP1L2;AFAP1L2	NM_001287824;NM_032550;NM_001001936	Body;Body;Body
cg10482532	0.0744189	5.53281	0.000457167	0.0211002	0.978475	chr10	96946522	S_Shelf
cg19281083	-0.0957263	-5.65382	0.000458986	0.0271498	0.978475	chr19	7953440	Island	LRRC8E;LRRC8E	NM_025061;NM_025061	1stExon;5'UTR
cg16726263	0.177981	-8.36392	0.000463087	0.0505136	0.978475	chr5	41904450	Island	C5orf51	NM_175921	TSS200
cg23377551	0.0562242	2.15492	0.0004632	0.0159575	0.978475	chr12	58130154	Island	AGAP2;AGAP2	NM_014770;NM_001122772	Body;Body
cg07281640	-0.130966	-7.65101	0.000463978	0.0371755	0.978475	chr9	111695707	N_Shore	IKBKAP;C9orf6	NM_003640;NM_017832	5'UTR;TSS1500
cg15412971	-0.0892935	5.16065	0.000464723	0.0253496	0.978475	chr4	956119	S_Shelf	DGKQ	NM_001347	Body
cg03470684	0.084678	4.84362	0.000464965	0.0240403	0.978475	chr1	55768455	OpenSea
cg27126575	0.0604223	0.283997	0.000465309	0.017155	0.978475	chr8	49043664	Island
cg19840066	-0.139728	-8.32472	0.000470234	0.0397034	0.978475	chr22	20792224	Island	SCARF2;SCARF2	NM_153334;NM_182895	TSS200;TSS200
cg13038618	0.0662051	0.771843	0.000471698	0.0188166	0.978475	chr14	77467391	OpenSea
cg14086396	0.146943	2.72282	0.000472108	0.0417666	0.978475	chr5	140479263	N_Shelf	PCDHB3	NM_018937	TSS1500
cg01983474	0.1045	-7.42273	0.000473045	0.0297073	0.978475	chr4	113067399	S_Shore	C4orf32	NM_152400	Body
cg04099238	0.0709566	5.73095	0.000473544	0.0201731	0.978475	chr2	37035809	Island	VIT	NM_053276	Body
cg18469917	-0.101173	4.59932	0.000476896	0.0287793	0.978475	chr18	12433231	Island
cg23244859	-0.0917758	-4.38851	0.000477863	0.0261104	0.978475	chr10	36828215	OpenSea
cg17557679	-0.0891787	5.58013	0.000478116	0.0253726	0.978475	chr4	128580812	OpenSea	INTU	NM_015693	Body
cg11377827	0.108801	-1.48447	0.000479522	0.0309624	0.978475	chr7	129417148	N_Shore
cg02390715	-0.0827141	4.43697	0.000479589	0.0235389	0.978475	chr17	40330366	N_Shelf	KCNH4	NM_012285	Body
cg15276281	-0.0878978	5.46193	0.000480468	0.0250177	0.978475	chr3	78418280	OpenSea
cg21833076	-0.110343	-2.83188	0.000481117	0.0314094	0.978475	chr11	104643591	OpenSea
cg24776498	0.0734753	6.18076	0.000481802	0.0209172	0.978475	chr12	12421246	S_Shore	LRP6	NM_002336	TSS1500
cg01526488	-0.108246	-3.72929	0.000482034	0.0308169	0.978475	chr9	135230521	Island	SETX	NM_015046	TSS200
cg01688264	0.349498	-8.08915	0.00048635	0.0995686	0.98448	chr17	47210020	Island	B4GALNT2;B4GALNT2;B4GALNT2	NM_153446;NM_001159388;NM_001159387	TSS1500;5'UTR;TSS200
cg08515869	0.0813151	5.05137	0.000491495	0.0231848	0.985614	chr4	24523278	OpenSea	MIR573	NR_030299	TSS1500
cg24680758	0.0857671	4.14247	0.000492482	0.024458	0.985614	chr6	102188078	OpenSea	GRIK2;GRIK2;GRIK2	NM_001166247;NM_175768;NM_021956	Body;Body;Body
cg24950828	0.08397	2.72195	0.000493308	0.0239486	0.985614	chr17	31995527	OpenSea	ACCN1	NM_001094	Body
cg16793866	0.114658	-5.58522	0.000494045	0.0327048	0.985614	chr20	24451518	Island	TMEM90B	NM_024893	5'UTR
cg20089899	0.0900971	4.77596	0.000495162	0.0257036	0.985614	chr17	79688684	OpenSea
cg18876007	0.151028	2.35486	0.000499071	0.0431129	0.985614	chr1	75606694	S_Shelf	LHX8	NM_001001933	Body
cg23498221	0.0746746	5.54871	0.000500586	0.0213218	0.985614	chr17	26681583	N_Shelf	POLDIP2	NM_015584	Body
cg15193475	0.0772106	5.17166	0.000502353	0.022052	0.985614	chr15	80998711	OpenSea	FAM108C1	NM_021214	Body
cg08036104	0.0784986	5.21097	0.000504185	0.0224262	0.985614	chr22	31257590	OpenSea	OSBP2;OSBP2;OSBP2;OSBP2;OSBP2	NM_001282741;NM_001282738;NM_030758;NM_001282739;NM_001282740	Body;Body;Body;Body;5'UTR
cg14030218	0.0857907	4.7378	0.000504995	0.0245125	0.985614	chr1	43786791	OpenSea	TIE1;TIE1	NM_001253357;NM_005424	Body;Body
cg00638384	0.0682512	5.33017	0.000508596	0.0195119	0.985614	chr12	68052134	OpenSea	DYRK2;DYRK2	NM_006482;NM_003583	Body;Body
cg07390986	-0.0805249	5.26881	0.000508914	0.0230218	0.985614	chr20	43249491	OpenSea	ADA	NM_000022	Body
cg16931523	0.0953203	4.72146	0.000510399	0.027258	0.985614	chr10	90838542	OpenSea
cg05136476	-0.241602	-7.39099	0.000510511	0.0690902	0.985614	chr3	53190709	Island
cg21054968	0.141737	-6.40849	0.000512179	0.0405424	0.985614	chr7	155089542	Island	INSIG1;INSIG1;INSIG1;INSIG1;INSIG1;INSIG1	NM_198336;NM_198337;NM_005542;NM_198337;NM_005542;NM_198336	5'UTR;1stExon;1stExon;5'UTR;5'UTR;1stExon
cg22043067	0.0821246	5.69898	0.00051221	0.023491	0.985614	chr9	99265059	OpenSea	CDC14B;CDC14B;CDC14B	NM_003671;NM_033331;NM_001077181	3'UTR;3'UTR;3'UTR
cg11491851	0.101444	1.18148	0.000514068	0.0290253	0.985614	chr14	25841582	OpenSea
cg25890275	0.149972	-8.12538	0.000515855	0.0429221	0.985614	chr11	60929200	Island	VPS37C	NM_017966	TSS1500
cg06695675	0.0945745	4.11292	0.000517619	0.0270744	0.985614	chr2	200485694	OpenSea	LOC101927641	NR_110270	Body
cg09584578	0.0774172	3.68321	0.000517816	0.0221634	0.985614	chr14	104712890	OpenSea
cg18652367	0.160862	-6.7753	0.000522148	0.0460825	0.985614	chr5	180017689	Island	SCGB3A1	NM_052863	Body
cg17660245	-0.0729827	4.5851	0.000523285	0.020911	0.985614	chr19	41190252	Island	NUMBL	NM_004756	Body
cg17211522	0.0847847	5.52287	0.000523326	0.0242927	0.985614	chr5	66557331	OpenSea
cg17334103	-0.0726013	5.42651	0.000523925	0.0208037	0.985614	chr18	48352033	OpenSea	MRO	NM_001127174	TSS1500
cg27086813	0.0902868	5.39169	0.000523958	0.0258716	0.985614	chr4	48935239	OpenSea
cg18121658	0.0693562	5.14458	0.000524265	0.0198749	0.985614	chr7	29167071	OpenSea	LOC101928168;CPVL;CPVL	NR_120523;NM_031311;NM_019029	Body;5'UTR;5'UTR
cg02536709	0.076085	5.96928	0.000525213	0.0218062	0.985614	chr14	24775208	OpenSea	NOP9;NOP9;CIDEB	NM_001286367;NM_174913;NM_014430	3'UTR;3'UTR;Body
cg01823150	0.0765636	5.92131	0.000526172	0.0219465	0.985614	chr12	77437003	OpenSea	E2F7	NM_203394	Body
cg04045987	0.101203	3.9931	0.000526353	0.02901	0.985614	chr12	85261807	OpenSea	SLC6A15;SLC6A15	NM_001146335;NM_182767	Body;Body
cg18116285	-0.105962	6.26339	0.000528364	0.0303832	0.985718	chr7	155581411	S_Shore
cg10744928	0.0677544	5.12709	0.000529129	0.0194299	0.985718	chr11	122889248	OpenSea	LOC341056	NR_027288	Body
cg03545047	-0.154062	-4.79044	0.00053579	0.0442238	0.98893	chr7	149321876	Island	ZNF767;ZNF767	NR_027788;NR_027789	Body;Body
cg23969950	0.116661	-0.762378	0.000537447	0.0334959	0.98893	chr5	6379131	S_Shore	MED10	NM_032286	TSS1500
cg16009178	0.0947031	4.28139	0.000538192	0.0271943	0.98893	chr4	183837394	N_Shore	DCTD;DCTD	NM_001921;NM_001012732	5'UTR;Body
cg25561904	0.0716126	3.0716	0.000538604	0.020565	0.98893	chr14	104165401	S_Shore	XRCC3;XRCC3;XRCC3;KLC1;KLC1	NM_001100119;NM_005432;NM_001100118;NM_182923;NM_001130107	Body;Body;Body;Body;Body
cg23839159	0.0758228	0.371092	0.000539041	0.0217755	0.98893	chr1	43281794	N_Shore	CCDC23;ERMAP	NM_199342;NM_001017922	Body;TSS1500
cg26288249	0.116656	-6.52675	0.000539041	0.0335023	0.98893	chr9	112810954	Island	AKAP2;PALM2-AKAP2;PALM2-AKAP2	NM_001004065;NM_147150;NM_007203	TSS200;Body;Body
cg12255062	-0.072421	4.52275	0.000542894	0.0208102	0.992761	chr6	32138332	S_Shelf	AGPAT1;AGPAT1	NM_006411;NM_032741	Body;Body
cg20447538	-0.0616319	2.83839	0.000545164	0.0177157	0.992761	chr10	99625515	OpenSea	CRTAC1;GOLGA7B	NM_018058;NM_001010917	Body;3'UTR
cg08093216	-0.133875	-5.55347	0.00054808	0.0384979	0.992761	chr19	12944890	Island	RTBDN	NM_031429	Body
cg15077218	-0.083053	5.78686	0.000549824	0.0238891	0.992761	chr1	27681916	N_Shore	MAP3K6	NM_004672	Body
cg18123327	0.0823496	4.87613	0.000550734	0.0236899	0.992761	chr14	55734984	N_Shelf
cg20636195	0.0972203	3.64523	0.000551799	0.0279721	0.992761	chr10	55071675	OpenSea
cg16916998	0.0649343	-2.27797	0.000553494	0.0186873	0.992761	chr13	21685056	OpenSea
cg12489819	-0.09786	-7.52651	0.000555246	0.02817	0.992761	chr1	155278858	S_Shore	FDPS;FDPS;FDPS;FDPS	NM_001135822;NM_001135821;NM_002004;NM_001135821	5'UTR;1stExon;5'UTR;5'UTR
cg19060895	0.0834915	-0.741766	0.000556378	0.0240378	0.992761	chr17	5419436	OpenSea	NLRP1;NLRP1;NLRP1;NLRP1;NLRP1	NM_014922;NM_001033053;NM_033006;NM_033007;NM_033004	Body;Body;Body;Body;Body
cg16008214	-0.096915	5.57872	0.000557145	0.0279055	0.992761	chr17	77019138	N_Shore	C1QTNF1;C1QTNF1;C1QTNF1;C1QTNF1-AS1;C1QTNF1-AS1;C1QTNF1	NM_198594;NM_030968;NM_153372;NR_040018;NR_040019;NM_153372	TSS1500;TSS1500;1stExon;Body;Body;5'UTR
cg21959717	0.106303	3.27547	0.000557881	0.030612	0.992761	chr4	20840348	OpenSea	KCNIP4;KCNIP4;KCNIP4;KCNIP4;KCNIP4;KCNIP4	NM_147181;NM_001035004;NM_147182;NM_025221;NM_147183;NM_001035003	Body;Body;Body;Body;Body;Body
cg00950497	0.0928618	1.97906	0.000558655	0.0267442	0.992761	chr10	116393423	S_Shore	ABLIM1;ABLIM1;ABLIM1	NM_001003408;NM_001003407;NM_002313	Body;Body;Body
cg09259934	0.0708727	5.97846	0.000558939	0.0204121	0.992761	chr11	44983234	OpenSea
cg19053479	-0.137057	-5.88932	0.000562153	0.0394918	0.993574	chr10	15901893	N_Shore	FAM188A	NM_024948	Body
cg08425757	-0.166538	5.64343	0.000563159	0.0479934	0.993574	chr8	141281002	OpenSea	TRAPPC9;TRAPPC9	NM_001160372;NM_031466	Body;Body
cg22183295	-0.0745491	5.56755	0.000564432	0.0214876	0.993574	chr15	79099845	N_Shelf	ADAMTS7	NM_014272	Body
cg15334482	0.095001	4.53377	0.000566779	0.0273916	0.993574	chr1	64578142	OpenSea	ROR1-AS1;ROR1-AS1;ROR1;ROR1	NR_110665;NR_110666;NM_001083592;NM_005012	Body;TSS1500;Body;Body
cg01453692	0.0718716	5.73296	0.000568446	0.0207275	0.993574	chr2	98264214	S_Shore	COX5B	NM_001862	Body
cg00439706	0.164834	-5.86722	0.000573864	0.0475733	0.993574	chr15	41954252	Island	MGA;MGA	NM_001080541;NM_001164273	5'UTR;5'UTR
cg03340855	-0.118956	-7.49308	0.000574473	0.0343353	0.993574	chr17	73975673	Island	TEN1;ACOX1;ACOX1;ACOX1;TEN1-CDK3	NM_001113324;NM_004035;NM_001185039;NM_007292;NR_037709	5'UTR;TSS200;TSS200;TSS200;Body
cg21508011	0.0729677	3.23733	0.000575119	0.0210631	0.993574	chr5	166737116	OpenSea	TENM2	NM_001122679	Body
cg16231931	0.0828994	5.31953	0.000577075	0.0239365	0.993574	chr6	154934242	OpenSea
cg02110635	0.089396	3.445	0.000577327	0.0258132	0.993574	chr14	57153652	OpenSea
cg08902789	0.117119	3.9142	0.000578468	0.0338236	0.993574	chr6	162800984	OpenSea	PARK2;PARK2;PARK2	NM_013988;NM_013987;NM_004562	Body;Body;Body
cg12654519	-0.0818429	-0.0475223	0.000578511	0.0236361	0.993574	chr4	148715234	OpenSea	ARHGAP10	NM_024605	Body
cg12099973	0.0664575	3.5069	0.000579071	0.0191943	0.993574	chr7	46525023	OpenSea
cg09180634	0.0572547	2.17238	0.000582311	0.0165437	0.993574	chr2	1095477	OpenSea	SNTG2	NM_018968	Body
cg06788249	-0.0953617	5.53631	0.000588838	0.0275791	0.993574	chr10	134566575	Island	INPP5A	NM_005539	Body
cg22974467	-0.103386	0.403468	0.000590205	0.0299053	0.993574	chr11	77168514	OpenSea	PAK1;PAK1	NM_002576;NM_001128620	5'UTR;5'UTR
cg00019654	0.10723	-0.412142	0.000591281	0.0310218	0.993574	chr14	82148289	OpenSea
cg04641695	0.0730078	5.17544	0.000591512	0.0211219	0.993574	chr5	63199618	OpenSea
cg21463799	-0.0423238	2.17942	0.00059225	0.0122459	0.993574	chr19	1630888	Island	TCF3;TCF3	NM_003200;NM_001136139	Body;Body
cg08773462	0.164512	-8.30518	0.000592758	0.0476029	0.993574	chr16	17107610	OpenSea
cg25937046	0.140137	5.76621	0.000596403	0.0405696	0.993574	chr18	21140643	OpenSea	NPC1	NM_000271	Body
cg10348234	-0.146611	-4.88194	0.000597061	0.0424478	0.993574	chr14	31698967	OpenSea
cg12269374	0.116666	-0.350994	0.000597235	0.0337787	0.993574	chr8	4238976	OpenSea	CSMD1	NM_033225	Body
cg01024668	0.076821	6.07205	0.000597673	0.0222435	0.993574	chr15	69099680	OpenSea	C15orf28;ANP32A	NR_026808;NM_006305	TSS1500;Body
cg04971779	-0.214582	-2.51273	0.000598568	0.0621395	0.993574	chr6	44190729	N_Shore	SLC29A1;SLC29A1;SLC29A1;SLC29A1;SLC29A1	NM_001078174;NM_001078176;NM_001078175;NM_004955;NM_001078177	5'UTR;TSS1500;TSS1500;5'UTR;TSS1500
cg12084392	0.0689775	-2.45403	0.000598571	0.0199748	0.993574	chr20	61447623	N_Shore	COL9A3	NM_001853	TSS1500
cg06094379	0.0938815	4.55099	0.000599027	0.0271883	0.993574	chr4	17537207	OpenSea
cg08188073	0.107397	-6.01702	0.000600051	0.0311066	0.993574	chr7	39991463	Island	CDK13;CDK13	NM_031267;NM_003718	Body;Body
cg17950169	0.113808	-2.9612	0.000600362	0.0329648	0.993574	chr1	226067900	N_Shore	TMEM63A	NM_014698	5'UTR
cg22096916	-0.0762452	4.48233	0.000606623	0.022103	0.993574	chr20	49458824	S_Shore	BCAS4;BCAS4;BCAS4	NM_198799;NM_001010974;NM_017843	Body;Body;Body
cg08533710	0.064331	-0.907205	0.000606637	0.0186492	0.993574	chr19	47292253	S_Shore	SLC1A5	NM_005628	TSS1500
cg21338685	0.0803615	4.84555	0.000607082	0.0232977	0.993574	chr11	68710890	OpenSea
cg02138710	0.0710781	3.86094	0.000607906	0.0206086	0.993574	chr5	161635903	OpenSea
cg11407290	0.119359	-8.09799	0.000609327	0.0346137	0.993574	chr19	39420982	N_Shore	MRPS12;MRPS12;SARS2;SARS2;MRPS12	NM_033363;NM_021107;NM_017827;NM_001145901;NM_033362	TSS1500;TSS1500;Body;Body;TSS1500
cg09555673	0.118958	-0.50502	0.000614137	0.0345191	0.993574	chr11	64163521	OpenSea
cg27114426	0.0904136	1.90562	0.000617009	0.026246	0.993574	chr11	22383897	OpenSea	SLC17A6	NM_020346	Body
cg00796164	-0.102983	5.562	0.00062256	0.0299164	0.993574	chr19	57654968	OpenSea	ZIM3	NM_052882	5'UTR
cg12962318	0.111056	-4.51696	0.000622679	0.0322619	0.993574	chr22	36903433	S_Shore	FOXRED2;FOXRED2	NM_024955;NM_001102371	TSS1500;TSS1500
cg23543263	-0.155874	-8.33792	0.00062324	0.0452849	0.993574	chr13	22245177	Island	FGF9	NM_002010	TSS200
cg17006442	0.0672612	3.17438	0.000625674	0.019547	0.993574	chr10	2112636	OpenSea
cg07072594	0.100145	4.51978	0.000626148	0.0291054	0.993574	chr4	30951665	OpenSea	PCDH7;PCDH7	NM_001173523;NM_032457	Body;Body
cg19215541	-0.0791148	4.18154	0.00062739	0.0229969	0.993574	chr16	86337686	Island
cg18015640	-0.0766974	5.79139	0.000627468	0.0222945	0.993574	chr1	93310900	OpenSea	FAM69A;FAM69A;FAM69A;FAM69A;FAM69A	NM_001252273;NM_001252271;NM_001252269;NM_001252270;NM_001006605	Body;Body;Body;Body;Body
cg04793813	0.0789017	-3.88092	0.000629988	0.0229426	0.993574	chr16	56659964	S_Shore	MT1E	NM_175617	Body
cg16414209	0.107738	3.52781	0.000630913	0.0313312	0.993574	chr1	171010715	OpenSea	MROH9	NM_001163629	Body
cg26824139	-0.0865263	5.37138	0.000635603	0.0251776	0.993574	chr20	3645639	S_Shelf
cg06862136	-0.110895	-4.22136	0.000637005	0.0322744	0.993574	chr11	112370277	OpenSea
cg14332813	-0.154088	4.48567	0.000637324	0.0448467	0.993574	chr15	79392094	OpenSea
cg11985424	0.059658	-3.54961	0.000637729	0.0173641	0.993574	chr21	43726997	S_Shore
cg13443385	0.0725934	5.08454	0.000641661	0.0211396	0.993574	chr2	192245185	OpenSea	MYO1B;MYO1B;MYO1B	NM_001130158;NM_001161819;NM_012223	Body;Body;Body
cg14794341	-0.0748401	5.55685	0.000643937	0.0218001	0.993574	chr1	203699970	OpenSea	LINC00260;ATP2B4;ATP2B4	NR_046213;NM_001001396;NM_001684	Body;Body;Body
cg20474699	0.145963	-7.05813	0.00064423	0.042519	0.993574	chr14	102976161	Island	ANKRD9	NM_152326	TSS200
cg25586273	0.0654209	2.5952	0.000644504	0.0190577	0.993574	chr1	59507539	OpenSea	LINC01358	NR_110626	Body
cg17603689	0.0490104	-2.48965	0.000647052	0.0142817	0.993574	chr1	50883013	Island
cg19823726	-0.171009	-4.31421	0.000647226	0.0498336	0.993574	chr16	47079160	OpenSea
cg20891097	-0.119739	-7.63584	0.000648632	0.0348991	0.993574	chr15	37391121	N_Shore	MEIS2;MEIS2;MEIS2;MEIS2;MEIS2;MEIS2;MEIS2;MEIS2	NM_172316;NM_170674;NM_002399;NM_170675;NM_172316;NM_170677;NM_172315;NM_170676	1stExon;Body;5'UTR;Body;5'UTR;Body;TSS1500;Body
cg02533289	-0.122966	-4.00035	0.000648888	0.0358408	0.993574	chr5	1952807	S_Shore
cg14802097	0.0965125	4.48039	0.000649936	0.0281341	0.993574	chr12	42970349	OpenSea	PRICKLE1	NM_153026	5'UTR
cg09473244	0.0843747	5.1414	0.000651809	0.0246015	0.993574	chr10	121305246	S_Shelf
cg02836764	0.0802736	6.0068	0.00065396	0.023412	0.993574	chr10	134499364	OpenSea	INPP5A	NM_005539	Body
cg01446958	0.0840267	4.63549	0.00065423	0.0245074	0.993574	chr3	39798664	OpenSea
cg00552318	0.0827555	-3.93097	0.000655103	0.0241393	0.993574	chr22	41633632	Island	CHADL	NM_138481	Body
cg24100168	0.058767	1.36353	0.000655633	0.0171431	0.993574	chr11	5667836	OpenSea	TRIM78P	NR_002777	Body
cg00270507	0.0872496	-5.60636	0.000656393	0.0254542	0.993574	chr17	1090692	OpenSea	ABR	NM_001159746	TSS200
cg10915554	0.0979218	-0.482635	0.000657104	0.0285702	0.993574	chr9	73021673	OpenSea	KLF9	NM_001206	Body
cg02996471	-0.107179	-4.71134	0.000657495	0.0312725	0.993574	chr19	3178512	N_Shore	S1PR4	NM_003775	TSS1500
cg10288264	0.0864925	4.51313	0.000657773	0.0252376	0.993574	chr6	169270004	OpenSea
cg03602830	0.0887798	4.55382	0.000659808	0.0259115	0.993574	chr11	11395358	OpenSea	GALNT18	NM_198516	Body
cg19853984	-0.131703	-7.65002	0.000662155	0.0384503	0.993574	chr9	95571654	Island	ANKRD19P	NR_026868	TSS1500
cg18118795	0.0865138	3.65195	0.00066258	0.0252588	0.993574	chr1	33117735	S_Shore	RBBP4;RBBP4;RBBP4	NM_001135255;NM_001135256;NM_005610	Body;Body;Body
cg07603991	0.0874205	5.15944	0.000663051	0.025525	0.993574	chr17	11461103	Island	SHISA6	NM_207386	Body
cg04666848	0.124135	4.02386	0.000663092	0.0362449	0.993574	chr18	55326974	OpenSea	ATP8B1;LOC100505549	NM_005603;NM_001242804	Body;Body
cg20930060	0.191726	-8.87051	0.000664052	0.0559867	0.993574	chr6	163835395	OpenSea	QKI;QKI;QKI;QKI	NM_206854;NM_006775;NM_206855;NM_206853	TSS1500;TSS1500;TSS1500;TSS1500
cg04676981	-0.122681	-6.13572	0.000666325	0.0358345	0.993574	chr17	34257488	N_Shore	RDM1;RDM1;RDM1;RDM1;RDM1;RDM1;RDM1;RDM1;RDM1;RDM1;RDM1;RDM1;RDM1	NR_027998;NR_027997;NR_027996;NM_001163120;NM_145654;NM_001163121;NM_001034836;NM_001163130;NM_001163125;NM_001163122;NM_001163124;NR_028000;NR_027999	Body;Body;Body;Body;Body;Body;Body;TSS200;TSS200;TSS200;TSS200;TSS200;TSS200
cg01795333	0.0858184	4.8042	0.000666531	0.0250678	0.993574	chr4	108922479	OpenSea	HADH;HADH	NM_001184705;NM_005327	Body;Body
cg10099105	-0.134521	4.19405	0.000667556	0.039299	0.993574	chr7	155093457	S_Shelf	INSIG1;INSIG1;INSIG1	NM_005542;NM_198337;NM_198336	Body;Body;Body
cg13200133	-0.101593	5.67154	0.000669965	0.0296881	0.993574	chr11	94190148	OpenSea	MRE11A;MRE11A	NM_005591;NM_005590	Body;Body
cg07828024	0.0891976	2.52296	0.000670965	0.0260689	0.993574	chr6	149772892	S_Shore	ZC3H12D	NM_207360	Body
cg26555310	0.151724	4.482	0.000672027	0.0443488	0.993574	chr1	68914717	OpenSea	RPE65	NM_000329	Body
cg18734657	-0.0991994	3.90776	0.000673443	0.0290007	0.993574	chr7	139420591	OpenSea	HIPK2;HIPK2	NM_001113239;NM_022740	Body;Body
cg15449899	-0.118991	-7.40623	0.000675881	0.034797	0.993574	chr1	40367671	Island	MYCL;MYCL;MYCL;MYCL;MYCL;MYCL	NM_001033081;NM_001033081;NM_005376;NM_001033082;NM_005376;NM_001033082	1stExon;5'UTR;1stExon;1stExon;5'UTR;5'UTR
cg05560127	0.160461	-1.08483	0.000676202	0.046926	0.993574	chr11	128554774	OpenSea
cg16374906	0.0756942	5.1041	0.000676588	0.0221374	0.993574	chr1	221838383	OpenSea
cg01624937	0.110243	-5.58209	0.0006782	0.0322477	0.993574	chr1	43997446	Island	PTPRF;PTPRF	NM_002840;NM_130440	5'UTR;5'UTR
cg13880654	0.0846809	1.52764	0.000680914	0.0247785	0.993574	chr9	6779450	OpenSea	KDM4C;KDM4C;KDM4C;KDM4C	NM_001146694;NM_015061;NM_001146695;NM_001146696	5'UTR;5'UTR;5'UTR;Body
cg24654028	0.0653354	0.50274	0.000681328	0.0191188	0.993574	chr11	8854482	OpenSea	ST5	NM_005418	5'UTR
cg10978346	-0.0978672	4.5744	0.000683015	0.0286442	0.993574	chr4	143352914	OpenSea	INPP4B;INPP4B	NM_003866;NM_001101669	5'UTR;5'UTR
cg10263322	0.0411619	1.81073	0.000687366	0.0120537	0.993574	chr13	91099637	OpenSea
cg26269797	0.116564	-7.77959	0.000689046	0.0341408	0.993574	chr7	130353928	Island	TSGA13;COPG2	NM_052933;NM_012133	Body;TSS1500
cg13363608	-0.0782937	5.11108	0.000690674	0.0229362	0.993574	chr1	114620557	OpenSea
cg13683280	0.122966	-4.80676	0.000690867	0.0360236	0.993574	chr9	137980469	Island	OLFM1;OLFM1	NM_014279;NM_006334	Body;Body
cg05402841	0.0851923	5.51509	0.000691298	0.024959	0.993574	chr14	101458508	OpenSea	SNORD114-31	NR_003224	TSS1500
cg17487726	0.12299	-8.39761	0.000692839	0.036039	0.993574	chr1	212208679	N_Shore	INTS7;DTL	NM_015434;NM_016448	Body;TSS1500
cg16763374	-0.114828	-6.19023	0.000693453	0.0336499	0.993574	chr3	27524823	N_Shore
cg17255712	0.0747261	-4.30996	0.000696788	0.0219068	0.993574	chr17	70116185	N_Shore	SOX9	NM_000346	TSS1500
cg07462954	-0.0792928	5.015	0.000699478	0.0232529	0.993574	chr4	2733734	Island	FAM193A	NM_003704	3'UTR
cg06766176	0.0817039	3.77419	0.000699968	0.0239613	0.993574	chr18	26375037	OpenSea
cg03066138	0.153558	-7.08908	0.000700491	0.0450367	0.993574	chr11	809697	Island	RPLP2	NM_001004	TSS1500
cg07477815	-0.0756489	4.86135	0.000702276	0.0221915	0.993574	chr19	5785818	Island	PRR22;DUS3L;DUS3L;PRR22	NM_153359;NM_020175;NM_001161619;NM_001134316	TSS1500;Body;Body;TSS1500
cg01960979	-0.0762585	5.01331	0.000702977	0.0223722	0.993574	chr16	1611342	OpenSea	IFT140	NM_014714	Body
cg25726284	-0.0835754	4.09485	0.000703728	0.0245209	0.993574	chr13	51023469	OpenSea	DLEU1	NR_109974	Body
cg11845292	0.122571	3.92621	0.000703742	0.0359622	0.993574	chr11	86651225	OpenSea
cg12402427	-0.0479889	6.72771	0.000704436	0.0140811	0.993574	chr1	10386331	Island	KIF1B	NM_015074	Body
cg08457169	-0.184559	-2.89553	0.000704754	0.0541558	0.993574	chr2	242805904	Island
cg08442934	0.0702125	-2.03675	0.000708824	0.0206124	0.993574	chr4	1773246	S_Shore
cg13013130	-0.0840217	4.68809	0.000711613	0.0246744	0.993574	chr11	2030543	N_Shelf
cg02759377	0.0945281	-0.0470767	0.000711929	0.0277608	0.993574	chr9	99079634	OpenSea	SLC35D2	NR_104627	Body
cg09341769	0.0815505	4.10608	0.000719225	0.0239696	0.993574	chr14	94169279	OpenSea	UNC79	NM_020818	Body
cg19291618	0.0583346	2.50038	0.000721831	0.017151	0.993574	chr18	4599319	OpenSea
cg09714035	-0.0465314	3.30547	0.000725436	0.0136863	0.993574	chr19	1374341	N_Shelf	MUM1;MUM1	NR_024247;NM_032853	Body;Body
cg05342853	-0.15012	-1.69317	0.000726169	0.0441587	0.993574	chr11	101929189	OpenSea	C11orf70;C11orf70	NM_001195005;NM_032930	Body;Body
cg01966117	-0.0621727	1.97032	0.000726855	0.0182898	0.993574	chr3	52528714	OpenSea	STAB1	NM_015136	TSS1500
cg16957581	0.124836	5.62839	0.000727334	0.0367261	0.993574	chr7	128441085	OpenSea	CCDC136;CCDC136	NM_001201372;NM_022742	Body;Body
cg04957214	0.1261	-5.62655	0.000727562	0.0370987	0.993574	chr4	90758221	Island	SNCA;SNCA;SNCA-AS1;SNCA;SNCA;SNCA	NM_000345;NM_001146055;NR_045481;NM_000345;NM_001146054;NM_007308	5'UTR;5'UTR;Body;1stExon;TSS200;TSS200
cg26974062	-0.165997	0.14929	0.000728571	0.0488423	0.993574	chr1	145440734	OpenSea	TXNIP;NBPF20;NBPF10;NBPF10	NM_006472;NM_001278267;NM_001039703;NM_001302371	Body;Body;Body;Body
cg10663765	-0.114188	1.21092	0.000728688	0.0335985	0.993574	chr3	194014592	Island
cg19671717	0.128113	-6.51247	0.000728826	0.0376964	0.993574	chr8	110551808	Island	EBAG9;EBAG9	NM_004215;NM_198120	TSS1500;TSS200
cg03998119	0.0908697	4.7255	0.00073032	0.0267423	0.993574	chr14	88945315	Island	PTPN21	NM_007039	Body
cg14471540	0.0708085	3.39733	0.000731016	0.0208401	0.993574	chr8	130596505	OpenSea	CCDC26	NR_130917	Body
cg23328938	0.0568406	-1.06765	0.000731568	0.0167301	0.993574	chr22	40447393	OpenSea	TNRC6B	NM_001024843	5'UTR
cg17978548	-0.197219	3.18374	0.000733776	0.0580629	0.993574	chr8	103589260	OpenSea
cg24559706	0.0937104	4.7949	0.000734963	0.0275927	0.993574	chr2	179669462	OpenSea	TTN;TTN;TTN;TTN;TTN;TTN;TTN	NM_003319;NM_133378;NM_133437;NM_133379;NM_001267550;NM_001256850;NM_133432	5'UTR;5'UTR;5'UTR;5'UTR;5'UTR;5'UTR;5'UTR
cg15651152	0.0791721	5.4223	0.000736176	0.0233151	0.993574	chr8	141297750	OpenSea	TRAPPC9;TRAPPC9	NM_001160372;NM_031466	Body;Body
cg16350729	-0.0894628	4.49096	0.000737375	0.0263492	0.993574	chr4	140120430	OpenSea
cg04790857	0.0742654	6.07277	0.000738622	0.0218762	0.993574	chr17	35448275	OpenSea	ACACA;ACACA;ACACA;ACACA;ACACA	NM_198838;NM_198837;NM_198839;NM_198836;NM_198834	Body;Body;Body;Body;Body
cg26295061	0.0801938	5.71401	0.000739148	0.0236239	0.993574	chr8	119052213	OpenSea	EXT1	NM_000127	Body
cg05745656	-1.28219	-4.04919	0.000739775	0.377741	0.993574	chr6	22271391	OpenSea
cg07251706	0.0714635	2.12556	0.000740845	0.021056	0.993574	chr3	143847559	OpenSea
cg11128910	0.0860223	5.30994	0.000743066	0.0253519	0.993574	chr1	27482379	S_Shore	SLC9A1;SLC9A1	NM_003047;NR_046474	TSS1500;TSS1500
cg03734609	-0.137643	0.0906249	0.000743129	0.0405656	0.993574	chr13	91837663	OpenSea	LINC00379	NR_047004	Body
cg21291881	0.0976102	5.50162	0.000745987	0.0287763	0.993574	chr7	8153369	OpenSea	ICA1;ICA1	NM_004968;NM_022307	3'UTR;3'UTR
cg04160663	-0.121732	-8.07506	0.000750276	0.0359048	0.993574	chr19	10342230	Island	S1PR2	NM_004230	TSS1500
cg22029587	0.175625	-8.18084	0.000750323	0.0518005	0.993574	chr2	233925001	N_Shore	INPP5D;INPP5D	NM_001017915;NM_005541	TSS200;TSS200
cg13401911	-0.134572	-5.87673	0.00075074	0.0396937	0.993574	chr1	20812335	Island	CAMK2N1;CAMK2N1	NM_018584;NM_018584	1stExon;5'UTR
cg21240572	0.0832634	4.91717	0.000753424	0.0245669	0.993574	chr9	36266353	OpenSea	GNE;GNE	NM_001190388;NM_001128227	Body;Body
cg19774553	0.122459	-7.05205	0.000755555	0.0361399	0.993574	chr14	50087255	Island	MGAT2;RPL36AL	NM_002408;NM_001001	TSS1500;5'UTR
cg07109603	0.108681	0.00935643	0.000757243	0.0320798	0.993574	chr12	24049014	OpenSea	SOX5;SOX5;SOX5;SOX5	NM_006940;NM_001261415;NM_152989;NM_001261414	Body;Body;5'UTR;5'UTR
cg03145915	-0.0838111	5.72626	0.000757304	0.024739	0.993574	chr19	48009914	OpenSea	NAPA;NAPA;NAPA	NR_038457;NR_038456;NM_003827	Body;Body;Body
cg19497071	0.0888133	-5.69628	0.000758492	0.0262189	0.993574	chr19	51869589	Island	ETFB;ETFB	NM_001985;NM_001985	1stExon;5'UTR
cg17438167	-0.123788	3.98832	0.000760865	0.0365534	0.993574	chr2	160601669	OpenSea	MARCH7;MARCH7;MARCH7;MARCH7	NM_001282805;NM_022826;NM_001282806;NM_001282807	Body;Body;Body;Body
cg26369413	0.110108	4.07995	0.000762029	0.0325178	0.993574	chr17	1384382	S_Shelf	MYO1C;MYO1C;MYO1C	NM_033375;NM_001080950;NM_001080779	Body;Body;Body
cg11097433	0.134075	-6.09628	0.00076651	0.0396152	0.993574	chr10	108924557	Island	SORCS1;SORCS1	NM_001013031;NM_052918	TSS1500;TSS1500
cg16758802	0.0884664	-3.33244	0.000771641	0.0261537	0.993574	chr3	88268736	OpenSea
cg15581268	0.0610068	-4.46988	0.000777881	0.0180478	0.993574	chr16	77756213	N_Shore	NUDT7;NUDT7	NR_024154;NM_001105663	TSS200;TSS200
cg16989086	-0.116146	4.14793	0.000778261	0.0343611	0.993574	chr20	62203971	Island	PRIC285	NM_001037335	5'UTR
cg18465072	0.0670118	4.84512	0.000778516	0.0198256	0.993574	chr17	30327605	OpenSea	SUZ12	NM_015355	3'UTR
cg21292476	0.0719093	4.89583	0.000782575	0.0212838	0.993574	chr14	35147771	OpenSea
cg16599804	-0.0791062	5.02312	0.000782639	0.0234141	0.993574	chr9	102278178	OpenSea
cg17597533	-0.0770126	5.35334	0.000784259	0.0227983	0.993574	chr4	16379511	OpenSea
cg24612498	0.0822919	4.49092	0.000786317	0.0243665	0.993574	chr3	8572798	OpenSea	LMCD1	NM_014583	Body
cg14504499	0.108631	-4.11242	0.000787346	0.0321689	0.993574	chr12	121733425	N_Shore	CAMKK2;CAMKK2;CAMKK2;CAMKK2;CAMKK2;CAMKK2;CAMKK2	NM_172215;NM_172216;NM_006549;NM_172214;NM_153499;NM_153500;NM_172226	5'UTR;5'UTR;5'UTR;5'UTR;5'UTR;5'UTR;5'UTR
cg07650665	0.0662593	5.3693	0.000788892	0.0196246	0.993574	chr4	129348812	OpenSea	LOC100507487	NR_125882	TSS1500
cg05900009	0.0705143	-3.23343	0.000790894	0.0208892	0.993574	chr9	126772614	S_Shore	LHX2	NM_004789	TSS1500
cg07183447	0.0983325	-5.28183	0.000792471	0.029135	0.993574	chr10	102484107	N_Shore
cg06341180	-0.0809912	4.70208	0.000794118	0.0240011	0.993574	chr1	26681141	OpenSea	AIM1L	NM_001039775	TSS1500
cg19426168	-0.0719138	4.47584	0.000794432	0.0213118	0.993574	chr20	30142541	OpenSea	HM13;HM13;HM13;HM13;HM13;HM13	NM_030789;NM_178581;NM_178580;NM_178580;NM_030789;NM_178581	ExonBnd;ExonBnd;ExonBnd;Body;Body;Body
cg00007324	-0.0800122	6.43941	0.000796133	0.0237159	0.993574	chr19	4047803	Island	ZBTB7A	NM_015898	Body
cg11785538	-0.159523	-3.71221	0.000799089	0.047298	0.993574	chr7	107221074	Island	BCAP29;BCAP29;BCAP29	NM_001008405;NR_027830;NM_018844	TSS200;Body;5'UTR
cg19009745	0.105615	4.12772	0.000801223	0.0313214	0.993574	chr2	129485901	OpenSea
cg04923388	-0.0946401	-6.80445	0.000804112	0.0280751	0.993574	chr5	41904550	Island	C5orf51	NM_175921	1stExon
cg08532152	-0.149259	-8.62127	0.00080569	0.0442851	0.993574	chr11	10772778	Island	CTR9	NM_014633	TSS200
cg23440331	-0.20737	-2.36422	0.000805869	0.0615276	0.993574	chr11	101917981	N_Shore	C11orf70	NM_032930	TSS1500
cg09618291	0.0560795	0.0304079	0.000806232	0.0166397	0.993574	chr2	149411300	OpenSea	EPC2	NM_015630	Body
cg14678583	-0.0754725	4.58521	0.000806438	0.0223944	0.993574	chr19	8575566	N_Shore	ZNF414	NM_001146175	3'UTR
cg04149955	-0.176194	-6.1636	0.000810073	0.0523003	0.993574	chr19	8115480	Island
cg05603099	0.0836254	4.73237	0.000810619	0.0248243	0.993574	chr12	15747954	OpenSea	PTPRO;PTPRO;PTPRO;PTPRO;PTPRO;PTPRO	NM_002848;NM_030667;NM_030671;NM_030670;NM_030669;NM_030668	Body;Body;Body;Body;Body;Body
cg11924172	0.112929	0.757442	0.000813874	0.0335343	0.993574	chr14	95231230	N_Shelf
cg08611289	0.108664	3.2877	0.000816787	0.0322775	0.993574	chr4	146803855	OpenSea	ZNF827;ZNF827	NM_001306215;NM_178835	Body;Body
cg27001534	-0.113294	-6.81988	0.000818006	0.0336569	0.993574	chr5	443220	Island	C5orf55;C5orf55;EXOC3	NM_138464;NM_138464;NM_007277	5'UTR;1stExon;TSS200
cg18324392	-0.0794512	5.52679	0.000818293	0.0236037	0.993574	chr21	38311682	OpenSea	HLCS;HLCS;HLCS	NM_001242784;NM_001242785;NM_000411	5'UTR;5'UTR;5'UTR
cg12035103	0.102464	3.94145	0.000820278	0.0304468	0.993574	chr2	3467180	OpenSea	TTC15	NM_016030	Body
cg20907669	-0.124012	-6.31314	0.000823009	0.0368599	0.993574	chr21	34755813	OpenSea
cg22831269	-0.113568	-4.09797	0.000824135	0.0337595	0.993574	chr11	1594867	N_Shore	HCCA2;LOC338651	NM_053005;NR_021489	Body;Body
cg19181996	0.0781672	5.21795	0.000825316	0.0232389	0.993574	chr3	167338427	OpenSea	WDR49	NM_178824	5'UTR
cg24800424	0.0805881	4.7935	0.000826774	0.0239622	0.993574	chr1	196151368	OpenSea
cg07391089	-0.128857	-7.06484	0.000827634	0.038318	0.993574	chr17	26133152	OpenSea
cg15684329	-0.0861695	5.22067	0.000827876	0.0256247	0.993574	chr8	118825173	OpenSea	EXT1	NM_000127	Body
cg09861543	-0.0739375	5.31616	0.000829854	0.0219916	0.993574	chr19	15376545	OpenSea	BRD4;BRD4	NM_058243;NM_014299	Body;Body
cg01167694	0.0892333	4.42173	0.000834994	0.0265548	0.993574	chr11	75409605	OpenSea
cg13245375	0.0736444	-5.49236	0.000835491	0.0219168	0.993574	chr12	51785163	N_Shore	GALNT6;GALNT6	NM_007210;NM_007210	5'UTR;1stExon
cg18187729	0.0803413	2.87646	0.000839654	0.0239199	0.993574	chr8	133117493	OpenSea	HHLA1	NM_001145095	1stExon
cg19805668	0.137411	-1.86988	0.000841709	0.0409196	0.993574	chr14	75418675	N_Shelf	PGF	NM_002632	Body
cg15546607	-0.124515	-8.41476	0.000843	0.0370841	0.993574	chr15	32323027	Island	CHRNA7	NM_000746	Body
cg17804770	-0.165443	-0.122261	0.00084687	0.0492924	0.993574	chr6	168339386	OpenSea	MLLT4;MLLT4;MLLT4	NM_001040000;NM_001207008;NM_001291964	Body;Body;Body
cg18265575	-0.0812291	4.66465	0.000847803	0.0242038	0.993574	chr14	55110329	OpenSea	SAMD4A;SAMD4A	NM_001161576;NM_015589	Body;Body
cg16974222	-0.0678429	4.60405	0.000850284	0.0202201	0.993574	chr7	6669945	OpenSea
cg04992852	0.0680002	5.32194	0.000851684	0.0202698	0.993574	chr19	55042308	S_Shelf
cg19404209	0.113304	3.93964	0.000853369	0.0337797	0.993574	chr2	109191921	OpenSea	LIMS1	NM_001193483	Body
cg13066502	-0.12773	-6.35308	0.000855512	0.0380887	0.993574	chr20	3827040	N_Shore	MAVS;MAVS;MAVS	NM_001206491;NM_020746;NR_037921	TSS1500;TSS1500;TSS1500
cg09095511	-0.135215	5.10929	0.000856748	0.0403256	0.993574	chr7	73452986	OpenSea	ELN;ELN;ELN;ELN;ELN;ELN;ELN;ELN;ELN;ELN;ELN;ELN;ELN	NM_001278918;NM_001278939;NM_001278914;NM_001081755;NM_001278913;NM_000501;NM_001081753;NM_001278917;NM_001278916;NM_001278915;NM_001081754;NM_001081752;NM_001278912	Body;Body;Body;Body;Body;Body;Body;Body;Body;Body;Body;Body;Body
cg11750057	0.11177	4.26802	0.000858822	0.0333404	0.993574	chr15	45521433	OpenSea
cg02579389	-0.0954376	3.69074	0.000859727	0.028471	0.993574	chr21	46407004	N_Shore
cg26636215	-0.0494058	3.18382	0.000860458	0.0147398	0.993574	chr16	81598417	OpenSea	CMIP;CMIP	NM_198390;NM_030629	Body;Body
cg02517261	-0.0909372	5.99775	0.000861284	0.0271326	0.993574	chr12	110940691	S_Shore	RAD9B;VPS29;VPS29	NM_152442;NM_016226;NM_057180	Body;TSS1500;TSS1500
cg01526547	0.134793	-5.18425	0.00086222	0.0402215	0.993574	chr13	110958122	N_Shore	COL4A1;COL4A1	NM_001845;NM_001303110	Body;Body
cg07980752	-0.139333	-6.51506	0.000862799	0.0415784	0.993574	chr15	100889906	N_Shore	SPATA41;SPATA41	NR_028140;NR_028139	Body;Body
cg10166090	0.0922923	5.79619	0.000863826	0.0275438	0.993574	chr14	68162924	OpenSea	RDH11	NM_016026	TSS1500
cg10537176	0.0793883	3.63588	0.000864847	0.023695	0.993574	chr2	133395195	OpenSea	GPR39	NM_001508	Body
cg11266803	0.117825	-7.44093	0.000866983	0.0351747	0.993574	chr1	115300687	OpenSea	CSDE1;CSDE1;CSDE1;CSDE1;CSDE1;CSDE1	NM_001242893;NM_001242892;NM_007158;NM_001007553;NM_001242891;NM_001130523	TSS200;TSS200;TSS200;TSS200;TSS200;TSS200
cg21952419	0.155267	-6.97395	0.000867053	0.0463525	0.993574	chr13	52027225	Island	INTS6;INTS6;INTS6;INTS6;INTS6;INTS6	NM_001039937;NM_001039938;NM_001039937;NM_012141;NM_001039938;NM_012141	1stExon;5'UTR;5'UTR;1stExon;1stExon;5'UTR
cg11507052	0.0837481	0.32332	0.000868364	0.0250049	0.993574	chr13	95618902	N_Shore
cg20953324	0.0832136	3.5066	0.000868451	0.0248455	0.993574	chr13	34021438	OpenSea	STARD13	NM_001243476	Body
cg03826446	-0.0801266	5.16104	0.000870644	0.0239289	0.993574	chr14	101155658	OpenSea
cg21615663	-0.0834866	5.91319	0.000872167	0.024936	0.993574	chr16	19727911	N_Shore	IQCK;C16orf88	NM_153208;NM_001012991	5'UTR;5'UTR
cg23865479	-0.118755	5.35658	0.000874229	0.0354771	0.993574	chr1	88292368	OpenSea
cg10848257	0.071567	5.97611	0.00087506	0.0213819	0.993574	chr15	65892318	OpenSea	VWA9;VWA9;VWA9;VWA9;VWA9;VWA9;VWA9	NR_045106;NR_045105;NR_045901;NR_045104;NM_001136043;NM_001207059;NM_001207058	Body;Body;Body;Body;Body;Body;Body
cg18521518	-0.085207	5.29728	0.00087608	0.0254595	0.993574	chr7	140201836	OpenSea
cg13134634	0.0916695	3.56316	0.000877399	0.027394	0.993574	chr13	76207486	N_Shelf	LMO7	NM_005358	Body
cg03860336	0.0670175	5.97473	0.0008795	0.0200312	0.993574	chr17	12914836	OpenSea	ELAC2;ELAC2;ELAC2	NM_018127;NM_173717;NM_001165962	Body;Body;Body
cg22872857	0.092678	5.06953	0.000879867	0.0277019	0.993574	chr8	21794985	OpenSea	XPO7;XPO7	NM_001100161;NM_015024	Body;Body
cg00946321	-0.0877167	5.53119	0.000882977	0.0262268	0.993574	chr19	17283478	Island	MYO9B;MYO9B	NM_001130065;NM_004145	Body;Body
cg01196304	0.0731014	5.03454	0.000883052	0.0218571	0.993574	chr12	76083092	OpenSea
cg19490688	-0.155013	-4.53349	0.000883201	0.0463489	0.993574	chr17	27369764	OpenSea	PIPOX	NM_016518	TSS200
cg26643384	-0.134252	-7.95098	0.000884302	0.0401458	0.993574	chr5	148651839	S_Shore	AFAP1L1;AFAP1L1	NM_001146337;NM_152406	Body;Body
cg00407659	0.0556583	2.18802	0.000888315	0.01665	0.993574	chr5	150538414	S_Shore	ANXA6;ANXA6	NM_001155;NM_004033	TSS1500;TSS1500
cg14582924	0.0661421	2.83483	0.000889128	0.0197878	0.993574	chr2	52599979	OpenSea
cg02792538	0.067719	-4.14267	0.000892305	0.0202657	0.993574	chr22	38477085	Island	SLC16A8	NM_013356	Body
cg07994006	-0.098091	5.51018	0.000892872	0.0293564	0.993574	chr19	46236221	N_Shore	BHMG1	NM_001310124	TSS1500
cg03354418	0.0725132	4.30898	0.00089422	0.0217043	0.993574	chr12	58162922	N_Shelf	METTL1;METTL1	NM_023033;NM_005371	3'UTR;Body
cg03068838	-0.077267	5.79638	0.000901016	0.0231421	0.993574	chr12	52549986	S_Shelf
cg21432560	-0.0706188	6.19609	0.000901407	0.0211517	0.993574	chr16	89755810	S_Shelf	CDK10;CDK10;CDK10;CDK10;CDK10;CDK10	NM_052987;NM_001160367;NM_001098533;NR_027703;NR_027702;NM_052988	5'UTR;5'UTR;5'UTR;Body;Body;Body
cg17419553	0.079646	4.67206	0.000903311	0.0238598	0.993574	chr2	19513318	OpenSea
cg20948472	0.213195	-7.98321	0.00090523	0.063879	0.993574	chr5	140079847	OpenSea	ZMAT2	NM_144723	TSS200
cg05317077	0.0910387	5.07062	0.000905785	0.0272791	0.993574	chr3	39542991	N_Shore	MOBP;MOBP;MOBP;MOBP;MOBP;MOBP;MOBP	NM_001278323;NM_182935;NM_001278322;NR_103506;NR_103505;NR_103504;NR_003090	TSS1500;5'UTR;5'UTR;Body;Body;Body;Body
cg16861327	-0.0771669	4.94954	0.000906527	0.0231241	0.993574	chr9	117110133	OpenSea	AKNA	NM_030767	Body
cg27060240	0.0915213	5.07123	0.000910685	0.0274363	0.993574	chr2	62412324	OpenSea
cg09193498	-0.0657773	2.36618	0.000910946	0.0197192	0.993574	chr17	27319853	OpenSea	SEZ6;SEZ6;SEZ6	NM_001098635;NM_178860;NM_001290202	Body;Body;5'UTR
cg04604505	-0.0854811	5.23502	0.000911389	0.0256272	0.993574	chr19	1922613	N_Shore	SCAMP4	NM_079834	Body
cg02727530	-0.0729687	4.71075	0.000919769	0.0218931	0.993574	chr3	128712175	N_Shore	KIAA1257	NM_020741	5'UTR
cg25306170	0.0827389	6.22728	0.000920622	0.0248264	0.993574	chr13	37680502	OpenSea	CSNK1A1L	NM_145203	TSS1500
cg13924105	-0.111396	3.38001	0.00092075	0.0334255	0.993574	chr3	128765899	Island
cg00688620	0.0794335	4.33853	0.000922164	0.023838	0.993574	chr4	6246051	N_Shore
cg11591032	0.0879466	4.57289	0.0009226	0.0263939	0.993574	chr4	182940206	OpenSea
cg03766449	0.0624356	-2.782	0.000927686	0.0187465	0.993574	chr15	89920918	Island	LOC254559	NR_015411	TSS1500
cg22825551	0.084138	4.49483	0.000927975	0.0252634	0.993574	chr22	31701379	OpenSea
cg25549075	-0.074161	5.4657	0.000931165	0.0222742	0.993574	chr20	23608021	OpenSea
cg00047941	-0.0690238	4.45993	0.000934497	0.0207376	0.993574	chr11	60783477	OpenSea	CD6;CD6;CD6;CD6	NR_045638;NM_006725;NM_001254751;NM_001254750	Body;Body;Body;Body
cg03061485	0.093215	4.27674	0.000936495	0.0280107	0.993574	chr2	23859348	OpenSea	KLHL29	NM_052920	Body
cg16627587	0.100076	3.36776	0.000936803	0.0300732	0.993574	chr5	45268733	OpenSea	HCN1	NM_021072	Body
cg10741308	0.0763603	5.02042	0.000937849	0.0229488	0.993574	chr10	97175272	OpenSea	SORBS1;SORBS1;SORBS1;SORBS1;SORBS1;SORBS1;SORBS1	NM_006434;NM_001034956;NM_015385;NM_001034957;NM_001034954;NM_001034955;NM_024991	Body;Body;Body;Body;Body;Body;Body
cg07731195	-0.0714525	5.45029	0.000939262	0.0214766	0.993574	chr20	37050524	OpenSea	SNHG17;SNHG17	NR_027241;NR_015366	Body;Body
cg04839616	-0.0774954	5.19782	0.000939424	0.0232933	0.993574	chr16	86787604	OpenSea
cg16014202	0.11379	1.12755	0.000941727	0.0342096	0.993574	chr19	45052300	OpenSea	CEACAM22P	NR_027754	Body
cg08486929	0.109321	4.33977	0.000941909	0.0328667	0.993574	chr4	181328797	OpenSea
cg23747996	-0.0580138	3.99795	0.000941928	0.0174415	0.993574	chr8	145723492	N_Shore	PPP1R16A	NM_032902	Body
cg02283662	-0.0779325	4.82804	0.000943941	0.0234343	0.993574	chr17	76106981	OpenSea
cg08706504	-0.0780288	4.66054	0.000944949	0.0234654	0.993574	chr9	37428821	OpenSea	GRHPR	NM_012203	Body
cg04944659	-0.0713473	3.55475	0.000945595	0.0214573	0.993574	chr1	10891531	OpenSea
cg19362689	-0.0399609	2.89883	0.000945991	0.0120184	0.993574	chr17	42287627	N_Shore	UBTF;UBTF;UBTF;UBTF	NR_045058;NM_014233;NM_001076684;NM_001076683	Body;Body;Body;Body
cg17563614	0.0824384	3.6446	0.000946292	0.0247945	0.993574	chr10	2208428	OpenSea
cg05920908	-0.130542	-4.41832	0.000947762	0.0392674	0.993574	chr1	27895372	Island	AHDC1	NM_001029882	5'UTR
cg10004179	0.102562	-7.30505	0.000948068	0.0308519	0.993574	chr15	65714393	N_Shore	IGDCC4	NM_020962	Body
cg11455109	0.0762823	5.46973	0.000948411	0.0229473	0.993574	chr1	245621901	OpenSea	KIF26B	NM_018012	Body
cg06881040	-0.0750847	2.22915	0.000950071	0.0225905	0.993574	chr16	30040916	N_Shore	FAM57B	NM_031478	Body
cg05616995	0.0883981	5.89618	0.00095145	0.0265993	0.993574	chr5	141393361	S_Shore	GNPDA1	NM_005471	TSS1500
cg20702887	0.0593924	-0.900168	0.000953617	0.0178749	0.993574	chr17	72246008	OpenSea	TTYH2;TTYH2	NM_052869;NM_032646	5'UTR;Body
cg00429268	0.0540419	1.15676	0.000953984	0.0162651	0.993574	chr20	48097073	N_Shore	KCNB1	NM_004975	Body
cg11635677	-0.192042	-5.19325	0.000958443	0.0578223	0.993574	chr5	39437757	OpenSea
cg09103231	-0.0768976	4.93011	0.000959059	0.0231546	0.993574	chr2	73182547	OpenSea	SFXN5	NM_144579	Body
cg04489338	-0.0907681	-5.72004	0.000960073	0.0273336	0.993574	chr3	137906106	Island	ARMC8;ARMC8;ARMC8	NM_213654;NM_014154;NM_015396	TSS200;TSS200;TSS200
cg06191470	0.087055	4.74345	0.000960415	0.0262162	0.993574	chr6	140864495	OpenSea
cg07226793	0.0960584	-5.94697	0.000961255	0.0289297	0.993574	chr16	30772838	Island	RNF40;C16orf93;C16orf93	NM_014771;NM_001014979;NM_001014979	TSS1500;5'UTR;1stExon
cg17405618	0.0854141	5.28769	0.000962614	0.0257271	0.993574	chr4	96204801	OpenSea	UNC5C	NM_003728	Body
cg10987720	-0.0664585	3.45647	0.000963795	0.0200197	0.993574	chr5	177827484	S_Shelf	COL23A1	NM_173465	Body
cg12842511	0.0731001	3.6274	0.000965193	0.0220232	0.993574	chr10	129851197	OpenSea	PTPRE;PTPRE	NM_006504;NM_130435	Body;Body
cg19674669	0.0876336	-5.14883	0.000967372	0.0264068	0.993574	chr11	134146910	Island	GLB1L3	NM_001080407	Body
cg17231385	0.0725605	5.30904	0.000967453	0.021865	0.993574	chr2	182493044	OpenSea	CERKL;CERKL;CERKL;CERKL;CERKL;CERKL;CERKL	NR_027690;NR_027689;NM_001160277;NM_001030311;NM_201548;NM_001030313;NM_001030312	Body;Body;Body;Body;Body;Body;Body
cg27209816	0.059577	-3.72242	0.00096994	0.0179566	0.993574	chr3	40547627	Island	ZNF620;ZNF620;ZNF620;ZNF620;ZNF620;ZNF620	NM_001256167;NM_175888;NM_175888;NM_001256168;NM_001256167;NM_001256168	1stExon;1stExon;5'UTR;1stExon;5'UTR;5'UTR
cg19516404	0.0499541	-2.01579	0.000970634	0.0150571	0.993574	chr3	147123475	N_Shelf	ZIC4;ZIC4;ZIC4	NM_032153;NM_001168378;NM_001168379	5'UTR;TSS1500;TSS200
cg11071155	0.110909	4.89597	0.000970997	0.0334313	0.993574	chr6	157012049	S_Shelf
cg14330283	0.109235	-5.41695	0.000972538	0.0329311	0.993574	chr19	38147197	Island	ZFP30	NM_014898	TSS1500
cg21725487	-0.174724	-6.45968	0.000973232	0.0526774	0.993574	chr11	85339067	N_Shore	TMEM126B;TMEM126B;TMEM126B;TMEM126B;TMEM126B;DLG2	NM_001193538;NM_001193537;NM_001256547;NM_001256546;NM_018480;NM_001142699	TSS1500;TSS1500;TSS1500;TSS1500;TSS1500;TSS1500
cg07522664	-0.143094	-8.61185	0.000975107	0.0431484	0.993574	chr19	44259120	Island	C19orf61;C19orf61	NM_019108;NM_019108	5'UTR;1stExon
cg05210558	-0.0807044	4.90359	0.000975262	0.0243358	0.993574	chr11	131410879	OpenSea	NTM	NM_001048209	Body
cg11907102	0.0653352	-4.57181	0.000975455	0.0197017	0.993574	chr2	201936469	S_Shore	NDUFB3;NDUFB3;FAM126B	NM_002491;NM_002491;NM_173822	5'UTR;1stExon;TSS200
cg07954908	-0.0756832	-0.428626	0.000976099	0.0228234	0.993574	chr8	57101913	OpenSea	PLAG1;PLAG1;PLAG1	NM_001114635;NM_001114634;NM_002655	5'UTR;5'UTR;5'UTR
cg27225224	0.0598547	-0.279314	0.000976546	0.0180508	0.993574	chr5	133520153	OpenSea
cg16051727	0.092299	4.35623	0.00097814	0.0278392	0.993574	chr5	144078179	OpenSea
cg10402869	0.0646769	6.24068	0.000979496	0.0195101	0.993574	chr9	137140392	OpenSea
cg25016127	-0.115789	-6.85607	0.000980417	0.0349311	0.993574	chr11	537432	Island	LRRC56	NM_198075	TSS200
cg04320404	-0.162611	-5.49931	0.000985166	0.0490768	0.993574	chr16	8963087	Island	CARHSP1;CARHSP1	NM_014316;NM_001042476	TSS1500;TSS1500
cg20599518	0.0850306	4.49293	0.000986911	0.0256666	0.993574	chr13	103333055	OpenSea
cg03444158	0.0818811	2.28293	0.000989457	0.0247214	0.993574	chr7	151247674	OpenSea
cg12722387	0.102411	1.69487	0.000993215	0.03093	0.993574	chr3	111412266	OpenSea	PLCXD2;PLCXD2	NM_001185106;NM_153268	Body;Body
cg13995609	0.0923834	3.70572	0.000994669	0.0279049	0.993574	chr2	147296857	OpenSea
cg07043927	0.0745655	4.31743	0.000998218	0.0225298	0.993574	chr11	71037380	OpenSea
cg20259191	0.0909345	3.21232	0.00099823	0.0274758	0.993574	chr17	55059920	OpenSea	SCPEP1	NM_021626	Body
cg17390339	-0.0773888	6.08308	0.000999988	0.0233865	0.993574	chr10	15291886	OpenSea	FAM171A1	NM_001010924	Body
cg01146943	0.0941575	3.91065	0.00100025	0.0284545	0.993574	chr13	51416749	N_Shore	DLEU7	NM_198989	Body
cg22684041	0.107835	-2.73869	0.00100102	0.03259	0.993574	chr19	1904554	N_Shore	SCAMP4;ADAT3	NM_079834;NM_138422	TSS1500;TSS1500
cg26211427	0.0868064	2.25201	0.00100107	0.0262349	0.993574	chr15	89991872	OpenSea
cg17346793	0.0936117	5.28276	0.00100128	0.0282921	0.993574	chr2	125536096	OpenSea	CNTNAP5	NM_130773	Body
cg17991990	-0.1449	-7.75868	0.00100172	0.0437945	0.993574	chr10	25305418	Island	ENKUR;THNSL1	NM_145010;NM_024838	TSS1500;TSS200
cg00792011	-0.0655782	4.53024	0.00100269	0.019822	0.993574	chr22	22041237	OpenSea	PPIL2;PPIL2;PPIL2	NM_148175;NM_014337;NM_148176	Body;Body;Body
cg21342392	-0.0831238	5.35546	0.00100287	0.0251258	0.993574	chr7	111203008	S_Shore	IMMP2L	NM_032549	TSS1500
cg01774108	0.199326	-6.95489	0.00100349	0.0602534	0.993574	chr2	214016113	N_Shore	IKZF2;IKZF2	NM_016260;NM_001079526	TSS1500;5'UTR
cg13812230	-0.0866918	2.72856	0.00100492	0.0262089	0.993574	chr12	57915555	N_Shore	MBD6;DDIT3	NM_052897;NM_004083	TSS1500;TSS1500
cg09012858	0.101226	0.440796	0.00100938	0.0306146	0.993574	chr6	28984234	N_Shore
cg03561389	0.0702585	4.99409	0.00100995	0.0212499	0.993574	chr3	196663802	OpenSea	NCBP2;NCBP2	NM_007362;NM_001042540	3'UTR;3'UTR
cg05900555	0.0925477	2.53561	0.0010129	0.0279985	0.993574	chr5	137981866	OpenSea
cg21507671	0.151473	5.04023	0.00101303	0.0458255	0.993574	chr4	184208978	OpenSea	WWC2	NM_024949	Body
cg07776426	0.0810745	3.25763	0.00101739	0.0245369	0.993574	chr10	5713058	OpenSea
cg23006655	0.0831173	4.30085	0.00101763	0.0251556	0.993574	chr14	82927675	OpenSea
cg00013441	0.0408728	-1.8505	0.00101806	0.0123707	0.993574	chr12	123258908	OpenSea	CCDC62;CCDC62;CCDC62	NM_201435;NR_027918;NM_032573	TSS200;TSS200;TSS200
cg20978694	0.0885013	-4.80096	0.00102003	0.0267906	0.993574	chr4	2061804	Island	NAT8L	NM_178557	Body
cg20449836	0.0779485	-0.954875	0.00102116	0.0235984	0.993574	chr1	19136993	OpenSea
cg17885063	0.0723574	0.442411	0.00102261	0.0219084	0.993574	chr17	56460127	OpenSea	RNF43;RNF43;RNF43	NM_001305545;NM_017763;NM_001305544	5'UTR;Body;Body
cg00232685	-0.0802092	-7.49475	0.00102536	0.0242914	0.993574	chr22	29977063	Island	NIPSNAP1	NM_003634	1stExon
cg13672379	0.0796909	4.46721	0.00102593	0.0241356	0.993574	chr13	111012914	OpenSea	COL4A2	NM_001846	Body
cg16317772	0.0752522	5.1214	0.001027	0.0227933	0.993574	chr8	21954815	OpenSea	FAM160B2	NM_022749	Body
cg03683250	-0.143885	-4.62453	0.00103121	0.043597	0.993574	chr15	66085298	S_Shore	DENND4A;DENND4A	NM_005848;NM_001144823	TSS1500;TSS1500
cg27047671	0.0753746	5.45632	0.00103154	0.0228392	0.993574	chr14	69006140	OpenSea	RAD51L1	NM_133509	Body
cg15461842	0.0751192	5.167	0.00103328	0.0227651	0.993574	chr2	170748176	OpenSea	UBR3	NM_172070	Body
cg00281153	-0.0818023	-2.74561	0.00103367	0.0247912	0.993574	chr16	75682798	S_Shore	TERF2IP;KARS;KARS	NM_018975;NM_001130089;NM_005548	Body;TSS1500;TSS1500
cg00761363	0.0686408	5.38504	0.00103786	0.0208098	0.993574	chr1	93246698	N_Shelf	EVI5	NM_005665	Body
cg04752352	-0.121803	5.54158	0.00103839	0.0369285	0.993574	chr11	17905495	Island	SERGEF	NM_012139	Body
cg22266303	-0.161353	2.76594	0.00103907	0.0489224	0.993574	chr10	114581677	OpenSea
cg03389364	0.0568001	2.09127	0.0010408	0.0172243	0.993574	chr2	6776256	OpenSea	LINC01246	NR_110498	TSS1500
cg03746133	0.136069	-8.64705	0.00104259	0.0412682	0.993574	chr18	2655879	Island	SMCHD1	NM_015295	TSS200
cg20950301	0.0890424	-3.34224	0.00104741	0.0270164	0.993574	chr11	12029738	Island	DKK3;DKK3;DKK3	NM_001018057;NM_015881;NM_013253	Body;Body;Body
cg02644421	0.0890551	3.09414	0.00104812	0.0270219	0.993574	chr2	10575762	S_Shelf
cg01632825	0.115006	-7.00255	0.00104939	0.0348998	0.993574	chr22	19278672	Island	CLTCL1;CLTCL1	NM_001835;NM_007098	Body;Body
cg12155036	-0.0800903	0.751578	0.00105052	0.0243066	0.993574	chr3	194015171	S_Shore
cg23949611	0.0922005	3.65776	0.00105737	0.0279977	0.993574	chr2	21255320	OpenSea	APOB	NM_000384	Body
cg27185183	-0.0813777	5.37769	0.00106056	0.0247177	0.993574	chr1	197652660	OpenSea	DENND1B;DENND1B;DENND1B;DENND1B	NR_125340;NM_001195215;NM_001300858;NM_144977	Body;Body;Body;Body
cg08301572	-0.107856	-7.36953	0.00106199	0.032764	0.993574	chr19	23300243	S_Shore
cg08762806	-0.171832	-4.18051	0.00106294	0.0522026	0.993574	chr2	32583448	S_Shore	BIRC6	NM_016252	Body
cg14651183	-0.163569	-2.18919	0.00106336	0.0496942	0.993574	chr8	97248129	OpenSea	UQCRB	NM_006294	TSS1500
cg09847222	-0.12581	5.76028	0.00106367	0.0382234	0.993574	chr7	47348487	OpenSea	TNS3	NM_022748	Body
cg13796804	-0.179323	-8.57608	0.00106419	0.0544839	0.993574	chr4	66536196	Island	EPHA5;EPHA5	NM_004439;NM_182472	TSS1500;TSS1500
cg11106508	-0.19778	-8.06323	0.00106643	0.0601029	0.993574	chr4	119200017	Island	SNHG8;SNORA24	NR_003584;NR_002963	Body;TSS1500
cg00036263	-0.0925892	5.22113	0.0010666	0.0281371	0.993574	chr1	245852353	Island	KIF26B	NM_018012	Body
cg06848468	-0.0964774	5.90516	0.00106993	0.0293266	0.993574	chr1	1597086	N_Shelf	CDK11B;CDK11B;CDK11B;CDK11B;CDK11B;LOC728661;CDK11B	NM_033493;NM_033489;NM_033486;NM_033488;NM_033492;NM_001110781;NM_033487	Body;Body;Body;Body;Body;3'UTR;5'UTR
cg18026660	0.078519	6.08031	0.00107078	0.0238694	0.993574	chr3	101334178	OpenSea
cg01109065	0.0526652	-0.0921065	0.00107254	0.0160123	0.993574	chr3	55508379	Island	WNT5A	NM_003392	Body
cg13531223	-0.0712168	4.49791	0.00107325	0.0216539	0.993574	chr8	145823540	Island	KIAA1688	NM_025251	Body
cg18753480	0.0848431	-5.53885	0.00107326	0.0257971	0.993574	chr1	110026701	Island	ATXN7L2	NM_153340	1stExon
cg08713155	0.086028	5.03658	0.00107825	0.026168	0.993574	chr7	106204498	OpenSea
cg16145857	0.0866366	4.73479	0.00107905	0.0263548	0.993574	chr8	49820761	N_Shelf
cg14126086	0.0760749	4.87124	0.00107924	0.0231423	0.993574	chr20	18434949	OpenSea	DZANK1	NM_001099407	Body
cg23748340	0.0893004	-0.743285	0.00108009	0.0271675	0.993574	chr12	48592721	Island
cg16260298	0.115427	-6.1084	0.00108092	0.0351181	0.993574	chr7	116140342	Island	CAV2;CAV2	NM_198212;NM_001233	Body;Body
cg13071817	0.0930948	4.43894	0.00108186	0.0283258	0.993574	chr3	81347939	OpenSea
cg01135627	0.0695562	5.43254	0.00108222	0.0211644	0.993574	chr18	9254213	OpenSea	ANKRD12;ANKRD12;ANKRD12;ANKRD12;ANKRD12;ANKRD12	NM_001204056;NM_001083625;NM_015208;NM_001204056;NM_001083625;NM_015208	ExonBnd;ExonBnd;ExonBnd;Body;Body;Body
cg03173722	0.0421477	0.509829	0.00108573	0.0128282	0.993574	chr4	71587640	OpenSea	RUFY3;RUFY3;RUFY3	NM_001130709;NM_001037442;NM_014961	Body;TSS200;TSS200
cg08661950	-0.0734845	5.44536	0.00108617	0.0223668	0.993574	chr17	49301694	OpenSea	MBTD1	NM_017643	Body
cg01476047	0.0811581	5.32356	0.00108638	0.0247029	0.993574	chr10	73974007	N_Shore	ASCC1	NM_015947	5'UTR
cg14127910	-0.101825	-5.05478	0.00108769	0.0309966	0.993574	chr2	105488326	N_Shore
cg17136528	0.0761147	5.58024	0.0010902	0.0231749	0.993574	chr6	166618736	OpenSea
cg05641885	-0.14326	-5.54399	0.00109244	0.0436268	0.993574	chr12	108306728	OpenSea
cg17789713	0.0743253	3.31357	0.00109428	0.0226375	0.993574	chr2	164571035	OpenSea	FIGN	NM_018086	Body
cg04806409	-0.0740419	3.97371	0.00109442	0.0225514	0.993574	chr21	43735505	OpenSea	TFF3	NM_003226	1stExon
cg17664443	-0.0774467	5.5902	0.00109586	0.0235912	0.993574	chr3	190264104	OpenSea	IL1RAP;IL1RAP;IL1RAP;IL1RAP;IL1RAP;IL1RAP	NM_001167929;NM_001167931;NM_001167930;NM_001167928;NM_134470;NM_002182	5'UTR;5'UTR;5'UTR;5'UTR;5'UTR;5'UTR
cg08640923	0.157733	-8.36744	0.00109977	0.0480622	0.993574	chr2	220117945	Island	TUBA4B;TUBA4A	NR_003063;NM_006000	TSS200;Body
cg25145687	0.142501	-2.57798	0.00110079	0.0434246	0.993574	chr11	1606664	OpenSea	HCCA2;KRTAP5-1;LOC338651	NM_053005;NM_001005922;NR_021489	Body;TSS200;Body
cg05542056	0.0898439	4.07802	0.00110193	0.0273808	0.993574	chr4	135123636	OpenSea	PABPC4L	NM_001114734	TSS1500
cg05906056	0.0908039	5.40052	0.00110378	0.0276774	0.993574	chr17	12452372	OpenSea	LINC00670;LINC00670	NR_034145;NR_034144	TSS1500;TSS1500
cg20520262	-0.0877805	3.24275	0.0011039	0.0267561	0.993574	chr3	8153918	OpenSea
cg19245091	0.0538997	5.53164	0.00110641	0.0164323	0.993574	chr5	172107394	N_Shelf	NEURL1B;NEURL1B;NEURL1B	NM_001142651;NM_001308178;NM_001308177	Body;Body;Body
cg01759597	0.111021	-6.77184	0.00110888	0.0338535	0.993574	chr7	96626788	OpenSea	DLX6AS	NR_015448	Body
cg11570011	0.0766745	4.77796	0.00111245	0.0233868	0.993574	chr4	16362340	N_Shore
cg02200725	-0.0787126	5.44021	0.00111275	0.024009	0.993574	chr13	48608110	N_Shelf
cg24440633	0.0949297	4.58034	0.00111388	0.0289581	0.993574	chr2	150128049	OpenSea
cg23461714	0.0586145	-1.03488	0.00111502	0.0178819	0.993574	chr11	113184990	N_Shore	TTC12	NM_017868	TSS1500
cg18666588	0.0824649	5.05132	0.00111733	0.0251626	0.993574	chr12	97824818	OpenSea
cg23228745	-0.0640176	4.52852	0.00111841	0.0195354	0.993574	chr13	111945188	OpenSea	ARHGEF7;ARHGEF7;ARHGEF7;ARHGEF7;ARHGEF7	NM_145735;NM_001113513;NM_001113511;NM_001113512;NM_003899	3'UTR;Body;3'UTR;3'UTR;Body
cg25537416	0.146088	2.95646	0.00111847	0.0445801	0.993574	chr5	163849692	OpenSea
cg17402006	0.0862009	5.0655	0.00112095	0.0263101	0.993574	chr8	77816247	OpenSea
cg00991534	-0.0750892	5.99993	0.00112394	0.0229239	0.993574	chr17	78038364	N_Shore	CCDC40;CCDC40	NM_001243342;NM_017950	Body;Body
cg24099509	0.0704494	5.2822	0.00112509	0.0215094	0.993574	chr3	141585206	OpenSea
cg05555928	-0.0785667	4.23395	0.00112559	0.0239886	0.993574	chr11	63887634	S_Shore	MACROD1	NM_014067	Body
cg17662148	0.184905	-7.19445	0.00112849	0.0564696	0.993574	chr14	45553376	Island	PRPF39;PRPF39	NM_017922;NM_017922	1stExon;5'UTR
cg18359827	0.073271	5.86065	0.001129	0.0223777	0.993574	chr1	25580410	OpenSea
cg26891574	0.0887065	3.67213	0.00112975	0.0270935	0.993574	chr1	56288471	OpenSea
cg14519428	-0.0662313	2.38323	0.00113071	0.0202304	0.993574	chr11	1281234	OpenSea	MUC5B	NM_002458	Body
cg08663634	0.0819225	3.05866	0.00113096	0.0250238	0.993574	chr13	112064940	S_Shore
cg09745958	-0.0798862	5.11246	0.0011322	0.0244041	0.993574	chr11	117670977	S_Shelf
cg13387972	0.0590791	3.62883	0.00113331	0.0180494	0.993574	chr10	334430	OpenSea	DIP2C	NM_014974	Body
cg17573594	-0.102699	-6.95342	0.00113335	0.031376	0.993574	chr12	110338513	Island	TCHP;TCHP;TCHP	NM_001143852;NM_032300;NM_032300	5'UTR;1stExon;5'UTR
cg10057346	0.0844371	4.49799	0.00113529	0.0258006	0.993574	chr11	9051881	OpenSea	SCUBE2;SCUBE2	NM_001170690;NM_020974	Body;Body
cg09330923	0.0883272	5.72258	0.00113648	0.0269917	0.993574	chr7	150742459	S_Shore	ABCB8	NM_007188	3'UTR
cg06534081	0.120463	3.42287	0.00113649	0.0368119	0.993574	chr11	31006183	OpenSea	DCDC5	NM_020869	5'UTR
cg25978487	0.107314	-5.24305	0.0011391	0.0328004	0.993574	chr6	32157150	OpenSea	PBX2	NM_002586	Body
cg21880569	-0.0693169	-1.78755	0.00114118	0.0211901	0.993574	chr5	16553020	OpenSea	FAM134B	NM_001034850	Body
cg10093768	-0.115845	3.95157	0.00114159	0.0354148	0.993574	chr11	92916144	OpenSea	SLC36A4;SLC36A4	NM_152313;NM_001286139	Body;5'UTR
cg21123366	-0.0783223	5.56303	0.00114242	0.0239453	0.993574	chr2	240960755	N_Shelf	NDUFA10	NM_004544	Body
cg15760396	-0.0629861	1.89062	0.00114354	0.0192583	0.993574	chr17	1204902	OpenSea
cg06161930	0.0603779	-2.02347	0.00114449	0.0184622	0.993574	chr19	56633191	S_Shore	ZNF787	NM_001002836	TSS1500
cg08872920	0.0590306	2.82192	0.00114601	0.0180523	0.993574	chr12	46580955	OpenSea	SLC38A1;SLC38A1;SLC38A1;SLC38A1;SLC38A1	NM_001278388;NM_001278387;NM_001278389;NM_001077484;NM_030674	3'UTR;3'UTR;3'UTR;3'UTR;3'UTR
cg19710916	0.0711727	3.8858	0.00114612	0.0217657	0.993574	chr11	102826382	OpenSea	MMP13	NM_002427	1stExon
cg13504933	-0.0692886	4.57018	0.00114855	0.0211935	0.993574	chr3	52162693	OpenSea	WDR51A;WDR51A;WDR51A	NM_015426;NM_001161580;NM_001161581	Body;Body;Body
cg13136510	0.0976735	-4.68994	0.00115041	0.0298799	0.993574	chr2	133174117	Island	GPR39	NM_001508	TSS200
cg06229380	0.0787104	5.49663	0.00115057	0.0240791	0.993574	chr3	197051783	OpenSea
cg25713048	-0.137754	-6.55937	0.00115373	0.042152	0.993574	chr14	73524844	N_Shore	RBM25	NM_021239	TSS1500
cg25558002	0.0914939	4.70579	0.00115584	0.0280011	0.993574	chr10	69893540	OpenSea	MYPN;MYPN;MYPN;MYPN;MYPN	NR_045662;NM_001256268;NR_045663;NM_032578;NM_001256267	Body;5'UTR;Body;Body;Body
cg24724689	0.175443	-2.40226	0.00115619	0.0536947	0.993574	chr2	11087224	OpenSea
cg24895623	0.0756023	-4.52937	0.00115671	0.0231392	0.993574	chr11	86013348	OpenSea	C11orf73;C11orf73;C11orf73;C11orf73;C11orf73	NR_024596;NR_024597;NM_016401;NR_024598;NM_016401	TSS1500;Body;1stExon;Body;5'UTR
cg13636216	-0.103176	-7.64933	0.00115842	0.0315825	0.993574	chr11	6256583	S_Shore	FAM160A2;FAM160A2	NM_001098794;NM_032127	TSS1500;TSS1500
cg11711870	0.0760208	5.06261	0.00115856	0.0232705	0.993574	chr12	1616660	OpenSea
cg22832061	0.164701	-7.2657	0.00116009	0.050422	0.993574	chr14	34420413	Island	EGLN3	NM_022073	TSS200
cg02654923	-0.0811006	6.24914	0.00116196	0.0248319	0.993574	chr3	113958092	OpenSea
cg22759185	-0.0656543	1.05185	0.00116332	0.0201046	0.993574	chr19	1492038	S_Shore	REEP6	NM_138393	Body
cg22095490	0.112976	2.27121	0.00116422	0.0345977	0.993574	chr18	77560089	Island
cg22658846	0.0674159	5.15165	0.00116606	0.0206483	0.993574	chr8	2019760	OpenSea	MYOM2	NM_003970	Body
cg23089425	-0.0869365	4.576	0.00116608	0.0266271	0.993574	chr8	19034837	OpenSea
cg10301852	-0.0648999	3.88603	0.00116609	0.0198777	0.993574	chr20	62665999	N_Shelf	LINC00176;LINC00176	NR_027687;NR_027686	Body;Body
cg15446399	0.0756152	4.82077	0.00116613	0.0231597	0.993574	chr12	28501308	OpenSea	CCDC91	NM_018318	Body
cg19571155	-0.0788483	4.87283	0.00116637	0.0241504	0.993574	chr9	136216943	S_Shore	SNORD36B;RPL7A;SNORD36A;SNORD36C	NR_000017;NM_000972;NR_002448;NR_000016	TSS200;Body;TSS1500;TSS1500
cg03529960	0.108004	-6.74283	0.00116708	0.0330823	0.993574	chr1	24018470	Island	RPL11	NM_000975	Body
cg10000335	0.13904	4.22039	0.00116837	0.042593	0.993574	chr10	76193220	OpenSea	ADK;ADK;ADK;ADK	NM_006721;NM_001202450;NM_001123;NM_001202449	Body;Body;Body;Body
cg26712737	-0.0752904	6.20131	0.00116927	0.0230657	0.993574	chr3	10332027	OpenSea	GHRLOS;GHRLOS;GHRLOS;GHRLOS;GHRLOS;GHRLOS;GHRL;GHRL;GHRL;GHRL;GHRL;GHRL;GHRL;GHRL;GHRL;GHRL;GHRL	NR_073567;NR_073566;NR_004431;NR_024145;NR_024144;NR_073568;NR_126505;NM_001134944;NM_001134946;NM_001134945;NM_001134941;NM_016362;NM_001302825;NM_001302824;NM_001302823;NM_001302822;NM_001302821	Body;Body;Body;Body;Body;Body;Body;Body;Body;Body;5'UTR;5'UTR;5'UTR;5'UTR;5'UTR;5'UTR;5'UTR
cg12896751	0.101636	-5.72277	0.00117221	0.031144	0.993574	chr2	97536137	Island	SEMA4C	NM_017789	TSS1500
cg00802147	0.0774355	4.15705	0.0011724	0.0237285	0.993574	chr2	39456516	OpenSea	CDKL4	NM_001009565	1stExon
cg19511947	-0.0783036	5.06177	0.0011742	0.0239978	0.993574	chr16	67683762	Island	RLTPR	NM_001013838	Body
cg13342558	0.126749	3.54606	0.00117684	0.0388527	0.993574	chr10	114043548	OpenSea	TECTB	NM_058222	1stExon
cg27595580	0.0662666	5.45974	0.0011769	0.0203129	0.993574	chr7	117828179	S_Shelf	NAA38	NM_016200	Body
cg08651538	0.0870867	2.97253	0.0011784	0.026698	0.993574	chr5	111069986	OpenSea	C5orf13;C5orf13;C5orf13;C5orf13;C5orf13;C5orf13;C5orf13;C5orf13;C5orf13;C5orf13;C5orf13	NM_004772;NM_001142481;NM_001142479;NM_001142478;NM_001142474;NM_001142480;NM_001142475;NM_001142483;NM_001142476;NM_001142482;NM_001142477	Body;Body;Body;Body;Body;Body;Body;Body;Body;Body;Body
cg24687229	-0.0770659	-5.336	0.00117984	0.0236285	0.993574	chr17	45973466	Island	SP2	NM_003110	TSS200
cg06088880	0.0950897	3.9677	0.00118039	0.0291558	0.993574	chr8	32569026	OpenSea	NRG1;NRG1;NRG1;NRG1;NRG1;NRG1;NRG1;NRG1;NRG1;NRG1;NRG1;NRG1;NRG1;NRG1;NRG1;NRG1	NM_013959;NM_013962;NM_004495;NM_001160007;NM_001160002;NM_001160005;NM_013958;NM_001160008;NM_001160004;NM_013960;NM_013964;NM_013956;NM_013957;NM_001159995;NM_001159999;NM_001160001	Body;Body;Body;Body;Body;Body;Body;Body;Body;Body;Body;Body;Body;Body;Body;Body
cg08552446	0.0784818	5.14705	0.00118068	0.0240641	0.993574	chr10	52898733	OpenSea	PRKG1;PRKG1	NM_001098512;NM_006258	Body;Body
cg23690344	-0.0732176	6.29667	0.00118652	0.0224599	0.993574	chr22	41649047	OpenSea	MIR6889;RANGAP1;RANGAP1	NR_106949;NM_001278651;NM_002883	Body;Body;Body
cg11575295	-0.556387	-2.42603	0.00119009	0.17072	0.993574	chr7	158250911	S_Shore	PTPRN2;PTPRN2;PTPRN2	NM_002847;NM_130842;NM_130843	Body;Body;Body
cg14672354	0.0844073	2.01173	0.00119104	0.0259011	0.993574	chr5	173763055	OpenSea	LINC01411	NR_125806	TSS1500
cg19291823	0.0628285	0.117886	0.00119192	0.0192807	0.993574	chr1	112162084	N_Shore	RAP1A;RAP1A;RAP1A	NM_001010935;NM_002884;NM_001291896	TSS1500;TSS1500;TSS1500
cg19182008	0.0862721	2.6229	0.00119301	0.0264772	0.993574	chr11	26298241	OpenSea
cg27305772	-0.0449632	1.83411	0.00119446	0.0138009	0.993574	chr11	65630355	S_Shore	MUS81	NM_025128	Body
cg20307125	-0.0766434	4.34788	0.00119486	0.0235254	0.993574	chr2	30336941	OpenSea
cg05001401	-0.0876893	4.44358	0.00119507	0.0269163	0.993574	chr2	53982382	OpenSea	ASB3;GPR75-ASB3;ASB3;ASB3	NM_016115;NM_001164165;NM_001201965;NM_145863	Body;Body;5'UTR;5'UTR
cg01962466	0.097773	2.16258	0.0011954	0.0300122	0.993574	chr5	7315413	OpenSea
cg15845964	0.0861064	5.93984	0.00119658	0.0264334	0.993574	chr7	65614462	OpenSea	CRCP;CRCP;CRCP;CRCP;CRCP	NR_024548;NM_001142414;NM_001040648;NM_001040647;NM_014478	Body;Body;Body;Body;Body
cg26822321	-0.153594	-1.34297	0.00119736	0.0471539	0.993574	chr7	39719041	OpenSea	RALA	NM_005402	5'UTR
cg02337960	0.117821	-6.18356	0.00119762	0.036172	0.993574	chr19	17378645	OpenSea	C19orf62;C19orf62	NM_001033549;NM_014173	5'UTR;5'UTR
cg15481172	0.101857	-1.03822	0.00119798	0.0312719	0.993574	chr1	2059086	OpenSea	PRKCZ;PRKCZ;PRKCZ	NM_001033582;NM_002744;NM_001033581	5'UTR;Body;5'UTR
cg11212023	0.0875565	5.20484	0.00120234	0.02689	0.993574	chr2	109881502	OpenSea	SH3RF3	NM_001099289	Body
cg24532031	-0.0743863	6.07496	0.00120291	0.0228462	0.993574	chr6	79576568	N_Shore	IRAK1BP1	NM_001010844	TSS1500
cg10891673	-0.145816	-2.50345	0.00120361	0.0447868	0.993574	chr9	107922101	OpenSea
cg06863878	0.0979232	5.43147	0.00120482	0.0300793	0.993574	chr6	32168732	OpenSea	NOTCH4	NM_004557	Body
cg03968687	0.0972121	2.30411	0.00121013	0.0298726	0.993574	chr7	28034394	OpenSea	JAZF1	NM_175061	Body
cg15012214	0.0823736	3.94287	0.0012105	0.0253135	0.993574	chr3	56810320	OpenSea	ARHGEF3;ARHGEF3;ARHGEF3	NM_001128615;NM_019555;NM_001128616	Body;Body;TSS1500
cg16244512	-0.0778499	4.80979	0.00121193	0.0239259	0.993574	chr16	57670264	OpenSea	ADGRG1;ADGRG1;ADGRG1;ADGRG1;ADGRG1;ADGRG1;ADGRG1;ADGRG1;ADGRG1	NM_001290142;NM_001290143;NM_005682;NM_001145770;NM_201525;NM_201524;NM_001145773;NM_001145772;NM_001145771	5'UTR;5'UTR;5'UTR;5'UTR;5'UTR;5'UTR;5'UTR;5'UTR;5'UTR
cg01952953	0.135874	-1.16297	0.00121228	0.0417597	0.993574	chr12	108168562	N_Shore	ASCL4;ASCL4	NM_203436;NM_203436	1stExon;5'UTR
cg09553187	0.126612	-6.33397	0.00121582	0.0389233	0.993574	chr8	65294798	S_Shelf
cg09860364	0.156484	4.27767	0.00121696	0.0481105	0.993574	chr5	40976887	OpenSea	C7	NM_000587	Body
cg22867359	0.0480291	-0.219477	0.00121731	0.0147668	0.993574	chr16	17570564	OpenSea
cg05245416	0.0819048	5.28127	0.00121974	0.0251865	0.993574	chr2	105087010	OpenSea	LOC150568	NR_015399	Body
cg18055294	0.0980157	-2.45477	0.00122105	0.0301437	0.993574	chr1	17513663	OpenSea
cg17285703	0.0926523	4.06196	0.00122249	0.0284972	0.993574	chr2	220477093	OpenSea	STK11IP	NM_052902	Body
cg15092039	0.0765666	3.86214	0.00122458	0.0235533	0.993574	chr6	148657019	OpenSea
cg10230310	-0.112451	-5.92666	0.00122667	0.0345973	0.993574	chr12	111052136	Island	TCTN1;TCTN1;TCTN1	NM_001082538;NM_024549;NM_001082537	1stExon;1stExon;1stExon
cg06327515	0.103386	-1.87721	0.00122695	0.0318089	0.993574	chr5	140603261	N_Shore	PCDHB14	NM_018934	1stExon
cg05608159	-0.0955082	-6.16276	0.00122993	0.0293915	0.993574	chr5	67584104	N_Shore	PIK3R1;PIK3R1	NM_181523;NM_181524	Body;TSS200
cg14698070	0.0775865	3.4959	0.00123061	0.0238775	0.993574	chr1	242189005	OpenSea
cg27024618	-0.124096	-3.73897	0.00123141	0.0381933	0.993574	chr6	50934458	OpenSea
cg25117142	-0.161187	4.56778	0.0012319	0.0496104	0.993574	chr13	114889950	OpenSea	RASA3	NM_007368	Body
cg24458671	0.077839	4.94012	0.00123549	0.0239637	0.993574	chr18	30023041	OpenSea	GAREM;GAREM	NM_001242409;NM_022751	Body;Body
cg15194432	0.0897382	3.23858	0.00123783	0.0276317	0.993574	chr7	136112254	OpenSea
cg19363360	0.10006	4.02849	0.00123844	0.0308111	0.993574	chr11	78508248	OpenSea	TENM4	NM_001098816	Body
cg13467814	-0.100424	-7.57975	0.00124015	0.0309271	0.993574	chr2	54013395	N_Shore	LOC100302652;ASB3;ERLEC1;ERLEC1;ASB3;ERLEC1	NM_001164165;NM_145863;NM_015701;NM_001127398;NM_016115;NM_001127397	Body;5'UTR;TSS1500;TSS1500;5'UTR;TSS1500
cg20172885	-0.194901	-5.56553	0.00124162	0.0600293	0.993574	chr7	86850419	S_Shore	C7orf23	NM_024315	TSS1500
cg25157839	-0.0621054	5.97985	0.00124297	0.0191302	0.993574	chr3	43626312	OpenSea	ANO10	NM_018075	Body
cg14067066	-0.0827944	-1.3398	0.00124388	0.0255047	0.993574	chr6	29717475	S_Shore	LOC285830;LOC285830	NR_026972;NR_026973	TSS1500;TSS1500
cg03689545	-0.130458	-0.193742	0.00124432	0.0401886	0.993574	chr6	64516610	OpenSea	EYS;EYS	NM_001292009;NM_001142800	Body;Body
cg00200956	0.0928976	3.59767	0.00124457	0.0286184	0.993574	chr1	208741176	OpenSea
cg07859359	-0.114083	-7.22966	0.00124623	0.0351492	0.993574	chr16	84538331	N_Shore	KIAA1609	NM_020947	TSS200
cg26773607	-0.453547	0.843953	0.00124637	0.13974	0.993574	chr2	1583968	OpenSea
cg08931872	-0.123502	2.45372	0.00124673	0.0380522	0.993574	chr19	7647568	OpenSea
cg14781700	-0.221014	4.8633	0.00124882	0.0681071	0.993574	chr1	36315949	OpenSea	AGO4	NM_017629	Body
cg11684158	0.0923219	1.66603	0.00124982	0.0284517	0.993574	chr5	167744939	OpenSea	WWC1;WWC1;WWC1	NM_001161661;NM_001161662;NM_015238	Body;Body;Body
cg18908258	0.1627	-5.71197	0.00125081	0.0501443	0.993574	chr8	29210721	Island
cg24308698	0.0688945	5.74222	0.00125244	0.0212359	0.993574	chr13	75877949	OpenSea	TBC1D4;TBC1D4;TBC1D4	NM_014832;NM_001286658;NM_001286659	Body;Body;Body
cg20790163	-0.0710136	5.78933	0.00125521	0.0218934	0.993574	chr6	21045531	OpenSea	CDKAL1	NM_017774	Body
cg14647044	0.0995902	3.78674	0.00125832	0.0307103	0.993574	chr18	76675274	S_Shore
cg06242449	0.107828	-1.21908	0.00125839	0.0332507	0.993574	chr8	144965577	N_Shore
cg24817351	0.0854924	3.32953	0.00125882	0.026364	0.993574	chr19	45447005	OpenSea	APOC4;APOC4-APOC2	NM_001646;NR_037932	Body;Body
cg27020260	0.0814713	5.36982	0.00125983	0.0251257	0.993574	chr4	25175711	OpenSea
cg04605667	-0.115137	-7.23092	0.00125997	0.0355086	0.993574	chr3	150481783	Island	SIAH2	NM_005067	TSS1500
cg20577663	-0.0546569	3.07855	0.00126066	0.0168572	0.993574	chr17	15360645	OpenSea	CDRT4	NM_173622	5'UTR
cg18983604	-0.146608	-4.52957	0.00126108	0.0452179	0.993574	chr7	1710516	Island
cg14451640	0.0586216	1.86835	0.00126119	0.0180807	0.993574	chr2	135760681	OpenSea	MAP3K19;MAP3K19;MAP3K19;MAP3K19;MAP3K19	NM_001282883;NM_001018047;NM_025052;NM_001018044;NM_001018046	Body;Body;Body;Body;Body
cg21522797	0.0752503	5.8324	0.00126179	0.0232104	0.993574	chr16	81806083	OpenSea
cg23680787	-0.0441344	2.92033	0.00126295	0.0136141	0.993574	chr14	104824167	OpenSea
cg03803589	-0.0919683	-5.99147	0.00126335	0.0283701	0.993574	chr14	53196609	Island	STYX;STYX	NM_001130701;NM_145251	TSS1500;TSS1500
cg12679353	-0.0928053	-5.97663	0.00126369	0.028629	0.993574	chr3	57583334	Island	ARF4	NM_001660	TSS200
cg10993460	-0.0722087	4.23632	0.0012649	0.0222772	0.993574	chr12	7276482	OpenSea	RBP5	NM_031491	3'UTR
cg13223726	0.0776199	5.62502	0.00126579	0.0239481	0.993574	chr11	35156311	OpenSea	LOC100507144	NR_120528	Body
cg16592453	-0.133745	-4.61852	0.00126783	0.0412703	0.993574	chr1	150460103	OpenSea	TARS2	NM_025150	Body
cg19896824	0.116341	-0.333321	0.00127167	0.0359098	0.993574	chr11	128555529	OpenSea
cg19432802	0.0718223	3.84974	0.0012756	0.0221747	0.993574	chr11	113156155	OpenSea
cg12142328	0.0643272	3.47846	0.00127595	0.0198612	0.993574	chr2	61691692	OpenSea	USP34	NM_014709	Body
cg00088688	0.128122	0.729718	0.00127661	0.0395599	0.993574	chr6	167560504	OpenSea
cg04716277	0.101944	4.26333	0.00127952	0.0314834	0.993574	chr2	219625165	OpenSea
cg22830590	-0.115196	-8.21436	0.00127961	0.0355761	0.993574	chr2	175260396	OpenSea	CIR1;CIR1;SCRN3	NM_004882;NM_004882;NM_024583	1stExon;5'UTR;TSS200
cg13018715	0.0493556	2.69803	0.00128108	0.0152441	0.993574	chr5	108105182	OpenSea	FER;FER;FER	NM_005246;NM_001308038;NM_001308028	5'UTR;5'UTR;5'UTR
cg06644942	0.0934948	4.80707	0.00128115	0.0288773	0.993574	chr2	122248262	OpenSea	CLASP1;CLASP1;CLASP1;CLASP1	NM_001142274;NM_001142273;NM_015282;NM_001207051	Body;Body;Body;Body
cg07110981	-0.0693665	5.38902	0.00128229	0.0214266	0.993574	chr11	102624673	OpenSea
cg19831356	0.0679666	5.59887	0.00128433	0.0209972	0.993574	chr19	2067739	S_Shelf
cg27033011	0.0521069	1.18188	0.0012858	0.0160993	0.993574	chr3	58592313	OpenSea	FAM107A	NM_001282714	Body
cg00911376	0.113624	4.07314	0.00128903	0.0351137	0.993574	chr16	84274417	S_Shelf	KCNG4	NM_172347	TSS1500
cg26337868	0.0864549	1.17562	0.00129171	0.0267226	0.993574	chr2	151345498	S_Shelf	RND3	NM_005168	TSS1500
cg25830605	0.0807676	4.84421	0.00129199	0.0249652	0.993574	chr6	79758654	OpenSea	PHIP	NM_017934	Body
cg06313775	0.0694726	5.44721	0.00129728	0.0214818	0.993574	chr20	35399961	N_Shore	DSN1;DSN1;DSN1;DSN1;DSN1	NM_001145317;NM_024918;NM_001145316;NM_001145318;NM_001145315	5'UTR;5'UTR;5'UTR;5'UTR;5'UTR
cg21942815	0.0698162	5.88651	0.00129925	0.021591	0.993574	chr1	111727072	OpenSea	CEPT1;CEPT1	NM_001007794;NM_006090	3'UTR;3'UTR
cg19863040	0.0939367	5.37911	0.00129958	0.0290511	0.993574	chr7	2136531	OpenSea	MAD1L1;MAD1L1;MAD1L1	NM_003550;NM_001013837;NM_001013836	Body;Body;Body
cg18124767	-0.0567601	4.018	0.00129975	0.017554	0.993574	chr21	45556740	S_Shelf	C21orf33;C21orf33	NM_004649;NM_198155	Body;Body
cg25225248	-0.0714112	5.55964	0.0013008	0.0220867	0.993574	chr12	95031358	OpenSea	TMCC3	NM_020698	Body
cg02158374	-0.0828784	4.4817	0.0013015	0.0256346	0.993574	chr16	3957886	OpenSea
cg13551148	0.117987	5.45826	0.00130316	0.0364981	0.993574	chr14	32182859	OpenSea	NUBPL;NUBPL;NUBPL;NUBPL	NM_001201574;NR_120408;NM_025152;NM_001201573	TSS1500;Body;Body;Body
cg20326208	-0.0748202	5.47375	0.00130545	0.0231485	0.993574	chr4	184250377	OpenSea
cg02310386	0.0764154	0.175793	0.00130545	0.023642	0.993574	chr12	103311761	S_Shore	PAH	NM_000277	TSS1500
cg20258580	0.0660692	4.78403	0.00130863	0.0204455	0.993574	chr15	99434759	Island	IGF1R	NM_000875	Body
cg09759446	-0.107826	3.59524	0.00130932	0.0333691	0.993574	chr8	1312682	S_Shore
cg27186528	0.0436878	0.584626	0.00130994	0.0135207	0.993574	chr1	203737534	OpenSea	LAX1;LAX1;LAX1	NM_001282878;NM_001136190;NM_017773	TSS1500;Body;Body
cg21828019	0.0676548	4.947	0.00131026	0.0209385	0.993574	chr18	37935776	OpenSea
cg02304095	0.0868532	0.834051	0.00131154	0.0268827	0.993574	chr2	2328709	OpenSea	MYT1L;LOC730811	NM_015025;NR_024468	5'UTR;Body
cg12667463	-0.0695546	5.26531	0.00131159	0.0215285	0.993574	chr14	106278558	OpenSea
cg06784122	-0.0789666	5.13007	0.00131311	0.0244442	0.993574	chr16	85688175	S_Shelf	KIAA0182;KIAA0182	NM_001134473;NM_014615	Body;Body
cg00212470	0.0771042	4.40734	0.00131467	0.0238703	0.993574	chr1	41301421	N_Shore	KCNQ4;KCNQ4	NM_004700;NM_172163	Body;Body
cg23184766	0.0796594	3.79445	0.00131574	0.0246631	0.993574	chr7	17718177	OpenSea
cg03290871	-0.0838657	4.57468	0.00131982	0.0259727	0.993574	chr7	106209092	OpenSea
cg10834480	0.086466	4.45775	0.00132187	0.0267818	0.993574	chr6	111928234	OpenSea	TRAF3IP2;TRAF3IP2;TRAF3IP2	NR_028338;NM_147686;NM_001164281	TSS1500;TSS1500;TSS1500
cg06323897	0.171763	-6.71103	0.00132299	0.0532054	0.993574	chr1	98386683	Island	DPYD;DPYD	NM_001160301;NM_000110	TSS200;TSS200
cg16586336	-0.0734401	4.45145	0.00132423	0.0227508	0.993574	chr16	2748071	S_Shore	KCTD5	NM_018992	Body
cg05856154	0.0589789	4.65616	0.00132721	0.0182746	0.993574	chr19	19550799	OpenSea	GATAD2A	NM_017660	5'UTR
cg18632712	-0.106745	-6.48258	0.00132732	0.0330753	0.993574	chr18	19748135	Island	GATA6	NM_005257	TSS1500
cg07536077	0.0633613	3.94974	0.00132969	0.0196358	0.993574	chr10	88426430	OpenSea
cg11551223	-0.0728532	5.47726	0.00133154	0.0225802	0.993574	chr2	62900410	OpenSea	EHBP1	NM_001142615	TSS1500
cg18882653	-0.154178	-6.35871	0.00133246	0.0477891	0.993574	chr1	195683538	OpenSea
cg02298771	-0.0821638	4.6736	0.00133292	0.0254683	0.993574	chr3	185793396	OpenSea	ETV5	NM_004454	Body
cg13155059	-0.104075	-6.51446	0.00133337	0.032261	0.993574	chr7	116502333	N_Shore	CAPZA2	NM_006136	TSS1500
cg18803110	0.106172	4.50138	0.00133364	0.0329119	0.993574	chr1	2057439	OpenSea	PRKCZ;PRKCZ;PRKCZ	NM_001033582;NM_002744;NM_001033581	5'UTR;Body;5'UTR
cg16363417	0.0771392	0.817752	0.00133395	0.0239126	0.993574	chr14	65749264	S_Shelf
cg09472437	0.0830541	4.88187	0.00133568	0.0257492	0.993574	chr2	179711530	OpenSea	CCDC141	NM_173648	Body
cg06081849	-0.0839783	5.44661	0.0013361	0.0260364	0.993574	chr2	45483405	OpenSea	LINC01121	NR_033831	TSS1500
cg00603722	-0.0830958	5.79265	0.00133652	0.0257635	0.993574	chr1	54357793	S_Shelf
cg04415434	0.163033	-9.23267	0.00134073	0.0505622	0.993574	chr3	126423069	Island	CHCHD6	NM_032343	TSS200
cg02705800	0.537997	-7.05595	0.00134224	0.166869	0.993574	chr15	93199018	Island	FAM174B;FAM174B	NM_207446;NM_207446	5'UTR;1stExon
cg02906074	0.0747738	4.67026	0.00134315	0.0231937	0.993574	chr14	73102873	OpenSea
cg01044097	-0.0707285	5.20418	0.00134469	0.0219412	0.993574	chr11	60884546	OpenSea	CD5	NM_014207	Body
cg05716854	0.0673612	3.46093	0.00134551	0.0208978	0.993574	chr11	27119394	OpenSea	BBOX1-AS1;BBOX1;BBOX1-AS1;BBOX1-AS1	NR_125768;NM_003986;NR_125766;NR_125767	Body;Body;Body;Body
cg21368930	-0.077359	4.73639	0.00134572	0.0239998	0.993574	chr20	10692225	OpenSea
cg01818460	0.0820042	1.51706	0.00134725	0.0254435	0.993574	chr22	43979264	OpenSea	EFCAB6;EFCAB6	NM_198856;NM_022785	Body;Body
cg20123706	0.0808714	5.31395	0.00134808	0.0250935	0.993574	chr22	40587043	OpenSea	TNRC6B;TNRC6B;TNRC6B	NM_001024843;NM_015088;NM_001162501	Body;Body;Body
cg14093630	-0.127309	-6.06081	0.00135114	0.0395106	0.993574	chr9	15423618	S_Shore	SNAPC3	NM_001039697	Body
cg21719636	0.0843563	5.10357	0.00135295	0.0261833	0.993574	chr6	131271119	OpenSea	EPB41L2;EPB41L2;EPB41L2;EPB41L2;EPB41L2	NM_001431;NM_001135554;NM_001135555;NM_001199388;NM_001252660	Body;Body;Body;Body;Body
cg14324600	-0.163679	4.91468	0.00136034	0.0508293	0.993574	chr15	50835263	OpenSea	USP50	NM_203494	Body
cg00467420	0.0957266	-5.16433	0.00136192	0.0297304	0.993574	chr10	1779432	Island	ADARB2;ADARB2	NM_018702;NM_018702	1stExon;5'UTR
cg08879264	-0.515632	5.51654	0.00136411	0.160166	0.993574	chr5	6322510	OpenSea	FLJ33360	NR_028351	Body
cg27202466	-0.116395	-6.29967	0.00136449	0.0361558	0.993574	chr3	97483751	S_Shore	ARL6;ARL6;ARL6;ARL6	NM_032146;NM_177976;NM_032146;NM_177976	5'UTR;5'UTR;1stExon;1stExon
cg16224563	0.0910703	4.07463	0.0013654	0.0282908	0.993574	chr6	38203369	OpenSea	BTBD9;BTBD9;BTBD9;BTBD9	NM_152733;NM_001172418;NM_001099272;NM_052893	Body;Body;Body;Body
cg27031987	0.122256	1.80164	0.00136619	0.0379804	0.993574	chr8	77527376	OpenSea	ZFHX4-AS1	NR_024360	Body
cg27021587	-0.0831997	5.14727	0.00136941	0.0258527	0.993574	chr1	1758687	OpenSea	GNB1;GNB1;GNB1	NM_001282538;NM_002074;NM_001282539	5'UTR;5'UTR;5'UTR
cg03847348	-0.0738924	4.14034	0.00137113	0.0229633	0.993574	chr1	2413705	N_Shore	PLCH2	NM_014638	Body
cg20302082	-0.104406	-7.42774	0.00137232	0.0324484	0.993574	chr2	120436534	Island	TMEM177;TMEM177;TMEM177	NM_001105198;NM_030577;NM_001105199	TSS1500;TSS1500;TSS1500
cg03701232	-0.0594038	3.70875	0.00137427	0.0184645	0.993574	chr1	29550329	OpenSea	MECR;MECR	NM_016011;NM_001024732	Body;5'UTR
cg17536666	-0.0735887	5.29354	0.0013746	0.0228741	0.993574	chr20	51117725	OpenSea
cg05206836	-0.123186	-5.46813	0.00137522	0.0382926	0.993574	chr4	181072124	OpenSea
cg12970154	0.0702703	5.51483	0.00137779	0.0218473	0.993574	chr1	153628920	N_Shelf
cg19288289	-0.0940408	4.16284	0.00137874	0.0292394	0.993574	chr22	35102049	OpenSea
cg15434569	0.161116	-7.43093	0.00137916	0.050096	0.993574	chr10	105253716	Island	NEURL	NM_004210	TSS200
cg11946424	0.0745407	1.62479	0.00138063	0.0231793	0.993574	chr15	74262051	OpenSea
cg19521832	-0.210706	-1.43407	0.00138213	0.0655279	0.993574	chr21	35831996	Island	KCNE1;KCNE1;KCNE1	NM_001127669;NM_000219;NM_001127668	TSS200;5'UTR;TSS200
cg26277433	0.0635151	2.42803	0.00138333	0.0197543	0.993574	chr8	137801843	OpenSea
cg11786320	0.0934971	2.56372	0.00138344	0.0290794	0.993574	chr4	6732865	S_Shelf
cg02648313	-0.103186	4.6241	0.00138426	0.0320946	0.993574	chr22	49008158	OpenSea	FAM19A5;FAM19A5	NM_001082967;NM_015381	Body;Body
cg01373151	0.0935231	-5.15015	0.00138647	0.0290933	0.993574	chr15	72613029	S_Shore	BRUNOL6	NM_052840	TSS1500
cg24742788	0.0580269	2.92059	0.00138672	0.0180514	0.993574	chr17	70710906	OpenSea	SLC39A11;SLC39A11	NM_139177;NM_001159770	Body;Body
cg14529347	-0.125019	-2.98007	0.00138754	0.0388936	0.993574	chr4	10013804	OpenSea	SLC2A9;SLC2A9	NM_020041;NM_001001290	Body;Body
cg10825471	-0.115746	2.09347	0.0013928	0.0360214	0.993574	chr10	134122566	S_Shore	STK32C	NM_173575	TSS1500
cg20552152	0.0795192	4.61596	0.00139756	0.0247549	0.993574	chr4	187979924	OpenSea
cg01714727	0.0765261	5.19437	0.00139955	0.0238262	0.993574	chr16	86160719	OpenSea
cg27229520	0.0443837	0.994077	0.00139959	0.0138188	0.993574	chr15	52287701	OpenSea
cg16252808	0.108597	-5.37952	0.00140024	0.033813	0.993574	chr19	1276280	Island	C19orf24	NM_017914	Body
cg12349580	-0.0630762	4.12483	0.00140105	0.0196405	0.993574	chr12	94681045	OpenSea	PLXNC1	NM_005761	Body
cg02771886	0.0641761	5.79346	0.00140216	0.0199844	0.993574	chr3	114036607	OpenSea	MIR568	NR_030293	TSS1500
cg05617002	0.0833879	3.33659	0.00140297	0.0259684	0.993574	chr2	115367604	OpenSea	DPP10	NM_020868	Body
cg01689239	0.112266	-2.55903	0.00140332	0.0349622	0.993574	chr12	48592635	Island
cg11894100	-0.108067	-5.83708	0.00140386	0.0336558	0.993574	chr4	71705650	Island	GRSF1;GRSF1	NM_002092;NM_001098477	TSS200;TSS1500
cg01247273	-0.104122	-4.45277	0.00140533	0.0324302	0.993574	chr6	112318395	OpenSea
cg23052678	0.0589168	2.46355	0.00140644	0.0183518	0.993574	chr1	11955445	OpenSea
cg10671478	0.200041	-4.75462	0.00140696	0.0623123	0.993574	chr20	52790299	Island	CYP24A1;CYP24A1;CYP24A1;CYP24A1	NM_000782;NM_001128915;NM_000782;NM_001128915	1stExon;1stExon;5'UTR;5'UTR
cg11889703	0.0806678	4.75951	0.00140721	0.0251282	0.993574	chr2	67428733	OpenSea	LOC102800447;LOC644838	NR_110564;NR_038844	Body;Body
cg06067932	-0.0997031	-7.07691	0.00140743	0.0310582	0.993574	chr15	74988555	Island	EDC3;EDC3;EDC3	NM_025083;NM_001142443;NM_001142444	TSS200;TSS200;TSS200
cg09941977	-0.110833	4.26695	0.00140844	0.0345275	0.993574	chr12	64272283	OpenSea	SRGAP1	NM_020762	Body
cg04121415	-0.163193	5.52608	0.0014127	0.0508531	0.993574	chr3	38325566	OpenSea
cg01964262	0.108915	-8.71446	0.00141286	0.0339398	0.993574	chr13	97874638	OpenSea	MBNL2;MBNL2;MBNL2;MBNL2	NM_144778;NM_207304;NM_144778;NM_207304	5'UTR;1stExon;1stExon;5'UTR
cg10724261	-0.0754048	5.61019	0.00141459	0.0235	0.993574	chr5	146777290	OpenSea	DPYSL3;DPYSL3	NM_001387;NM_001197294	Body;Body
cg26464840	0.0812512	5.11861	0.00141547	0.0253235	0.993574	chr6	135956089	OpenSea	LINC00271	NR_026805	Body
cg12738197	1.13754	-9.09952	0.00141552	0.354537	0.993574	chr8	125985883	OpenSea	ZNF572	NM_152412	5'UTR
cg18313769	0.123436	-8.04203	0.00141727	0.0384755	0.993574	chr15	84107647	OpenSea
cg00695694	0.0666768	5.29728	0.00141972	0.0207868	0.993574	chr2	171638962	OpenSea	ERICH2;ERICH2	NM_001289947;NM_001290030	TSS1500;Body
cg01604138	-0.0708272	4.66093	0.00142095	0.0220824	0.993574	chr11	71202794	OpenSea	NADSYN1	NM_018161	Body
cg15792713	0.0779888	5.3644	0.00142558	0.0243225	0.993574	chr17	26674270	OpenSea	POLDIP2	NM_015584	3'UTR
cg07299095	-0.0706574	5.65852	0.00142719	0.0220383	0.993574	chr20	46174212	OpenSea	NCOA3;NCOA3;NCOA3;NCOA3	NM_006534;NM_181659;NM_001174088;NM_001174087	5'UTR;5'UTR;5'UTR;5'UTR
cg03890037	0.129462	-2.69255	0.00142784	0.0403814	0.993574	chr5	115297989	Island	LVRN	NM_173800	TSS200
cg17189558	0.0778712	4.99741	0.00142855	0.0242905	0.993574	chr3	160879441	N_Shore
cg19940183	0.121555	-5.35846	0.00143039	0.0379213	0.993574	chr15	57883962	N_Shore	GCOM1;GCOM1;GCOM1;GCOM1	NM_001018100;NM_001018090;NM_001018091;NM_152451	TSS200;TSS200;TSS200;TSS200
cg15268101	-0.0798426	5.32688	0.00143232	0.0249114	0.993574	chr15	90704119	OpenSea
cg01719141	0.0804961	-4.65201	0.00143241	0.0251155	0.993574	chr9	140513215	Island	C9orf37;C9orf37;EHMT1;EHMT1	NM_032937;NM_032937;NM_024757;NM_001145527	5'UTR;1stExon;TSS1500;TSS1500
cg24935792	0.129314	4.25545	0.00143345	0.0403497	0.993574	chr10	71543579	OpenSea
cg12527478	0.0647041	-1.09696	0.00143479	0.0201913	0.993574	chr1	44844189	OpenSea
cg20256327	0.0720883	3.00814	0.00143855	0.022501	0.993574	chr11	28679066	OpenSea
cg10837383	0.0778513	4.15761	0.00143861	0.0242999	0.993574	chr6	9096296	OpenSea
cg09063835	0.0866517	0.687366	0.00143915	0.0270477	0.993574	chr20	58181392	S_Shore	PHACTR3	NM_080672	Body
cg07829740	0.0772104	4.17621	0.00144385	0.0241079	0.993574	chr6	31850189	OpenSea	EHMT2;EHMT2	NM_006709;NM_025256	Body;Body
cg16192068	-0.0792033	5.4684	0.00144491	0.0247318	0.993574	chr7	137669081	OpenSea	CREB3L2;CREB3L2	NM_194071;NM_001253775	Body;Body
cg02227331	-0.129812	3.23036	0.00144528	0.0405356	0.993574	chr2	234663937	Island	UGT1A10;UGT1A6;UGT1A8;UGT1A4;UGT1A3;UGT1A6;UGT1A9;UGT1A7;UGT1A5	NM_019075;NM_205862;NM_019076;NM_007120;NM_019093;NM_001072;NM_021027;NM_019077;NM_019078	Body;Body;Body;Body;Body;Body;Body;Body;Body
cg14029891	-0.146204	-7.08102	0.00145085	0.0456705	0.993574	chr7	107204399	Island	COG5;COG5;COG5;DUS4L	NM_001161520;NM_181733;NM_006348;NM_181581	1stExon;1stExon;1stExon;TSS200
cg14308782	-0.112662	0.335475	0.00145369	0.035199	0.993574	chr8	59823815	OpenSea	TOX	NM_014729	Body
cg17409593	-0.0893536	6.02968	0.00145379	0.027917	0.993574	chr1	200841769	N_Shore	GPR25	NM_005298	TSS1500
cg22806334	0.06158	5.90057	0.00145391	0.0192398	0.993574	chr2	160601171	OpenSea	MARCH7;MARCH7;MARCH7;MARCH7	NM_001282805;NM_022826;NM_001282806;NM_001282807	Body;Body;Body;Body
cg24911397	0.0805134	6.25303	0.00145473	0.0251565	0.993574	chr17	61436223	OpenSea	TANC2	NM_025185	Body
cg05715085	0.10175	3.59731	0.00145476	0.0317921	0.993574	chr14	58063680	OpenSea	SLC35F4;SLC35F4	NM_001206920;NM_001306087	Body;Body
cg06615999	0.0576049	5.34601	0.00145491	0.0179989	0.993574	chr16	89178870	OpenSea	ACSF3;ACSF3;ACSF3	NM_174917;NR_023316;NM_001127214	Body;Body;Body
cg18364779	-0.115653	-7.58761	0.00145529	0.0361372	0.993574	chr6	26104403	Island	HIST1H4C	NM_003542	1stExon
cg14391851	-0.0728136	4.74711	0.00145725	0.0227543	0.993574	chr11	836422	S_Shelf	CD151;CD151;CD151;CD151;CD151;CD151;CD151;CD151	NM_001039490;NM_139029;NM_139030;NM_004357;NM_001039490;NM_139029;NM_139030;NM_004357	Body;Body;Body;Body;ExonBnd;ExonBnd;ExonBnd;ExonBnd
cg18258120	0.0799935	4.54147	0.00145991	0.0250022	0.993574	chr20	15538767	OpenSea	MACROD2;MACROD2	NM_080676;NM_001033087	Body;5'UTR
cg10518627	0.0798361	5.06674	0.0014604	0.0249538	0.993574	chr17	70517283	OpenSea	LINC00673	NR_036488	Body
cg06403510	0.113984	-6.56452	0.00146176	0.0356302	0.993574	chr8	120868436	Island	DSCC1	NM_024094	TSS1500
cg18807449	0.0615878	4.93579	0.00146232	0.0192524	0.993574	chr10	123141788	OpenSea
cg19087281	0.08211	4.43268	0.00146397	0.0256703	0.993574	chr8	62737678	OpenSea
cg07321776	-0.23404	-2.48459	0.00146421	0.0731697	0.993574	chr21	35832028	Island	KCNE1;KCNE1;KCNE1	NM_001127669;NM_000219;NM_001127668	TSS200;5'UTR;TSS200
cg17385203	0.0754126	4.97001	0.00146622	0.0235798	0.993574	chr3	126886277	OpenSea
cg18925648	-0.0734294	4.96401	0.00147314	0.0229697	0.993574	chr7	86228383	OpenSea
cg00851782	-0.0850485	5.55113	0.00147454	0.0266066	0.993574	chr17	49261324	OpenSea	MBTD1	NM_017643	Body
cg11443159	0.123027	-6.05628	0.00147527	0.0384896	0.993574	chr19	44099295	Island	IRGQ;ZNF576;ZNF576	NM_001007561;NM_024327;NM_001145347	Body;TSS1500;TSS1500
cg22753607	0.132526	-7.58933	0.00147744	0.041467	0.993574	chr9	37120306	Island	ZCCHC7	NM_032226	TSS200
cg14001157	0.222777	-5.73184	0.00147868	0.0697114	0.993574	chr7	157483006	Island	PTPRN2;PTPRN2;PTPRN2	NM_002847;NM_130842;NM_130843	Body;Body;Body
cg08827427	0.0635968	1.27182	0.00147944	0.0199017	0.993574	chr19	412912	S_Shelf
cg24039042	0.0774683	-0.294808	0.00147967	0.0242429	0.993574	chr6	170580947	Island
cg00254448	0.0790935	5.43114	0.00148115	0.0247538	0.993574	chr1	50898431	OpenSea
cg10816993	-0.12972	0.571882	0.00148195	0.0406005	0.993574	chr2	113874415	OpenSea	IL1RN;IL1RN;IL1RN	NM_000577;NM_173843;NM_173841	TSS1500;TSS1500;TSS1500
cg05193236	-0.138029	-7.65123	0.00148319	0.0432044	0.993574	chr14	50999128	Island	ATL1;MAP4K5;MAP4K5;MAP4K5	NM_001127713;NM_006575;NM_198794;NM_198794	TSS1500;5'UTR;5'UTR;1stExon
cg08635528	0.0990352	3.09505	0.0014851	0.0310025	0.993574	chr7	117110958	OpenSea
cg11391509	0.0767283	4.68267	0.00148659	0.0240217	0.993574	chr14	79664874	OpenSea	NRXN3;NRXN3	NR_073547;NM_004796	Body;Body
cg05305078	0.102005	-6.0047	0.00148744	0.031937	0.993574	chr11	131056727	OpenSea
cg14946113	-0.0775158	5.50323	0.00148882	0.0242716	0.993574	chr22	44220872	OpenSea	SULT4A1	NM_014351	3'UTR
cg09857149	0.0502623	-3.07439	0.00149015	0.0157393	0.993574	chr19	37178105	Island
cg20869635	0.0825367	3.00593	0.00149163	0.0258482	0.993574	chr13	81801349	OpenSea	LINC00564	NR_047494	TSS1500
cg03219809	0.0884593	4.15703	0.00149395	0.027707	0.993574	chr11	63752561	N_Shore	OTUB1;OTUB1	NR_003089;NM_017670	TSS1500;TSS1500
cg01897036	0.0956724	5.26278	0.00149483	0.0299679	0.993574	chr2	120282327	S_Shore	SCTR	NM_002980	TSS1500
cg02678221	0.087847	4.56754	0.00149501	0.027517	0.993574	chr8	128822094	OpenSea
cg00110785	0.0717861	-1.41551	0.00149506	0.0224862	0.993574	chr7	45927947	N_Shore	IGFBP1	NM_000596	TSS200
cg19345626	0.142541	2.7246	0.00149607	0.0446522	0.993574	chr5	140805571	N_Shore	PCDHGB8P;PCDHGA8;PCDHGB5;PCDHGA9;PCDHGB6;PCDHGA10;PCDHGB7;PCDHGA11;PCDHGA11;PCDHGA1;PCDHGA2;PCDHGA3;PCDHGB1;PCDHGA4;PCDHGB2;PCDHGA5;PCDHGB3;PCDHGA6;PCDHGA7;PCDHGB4	NR_001297;NM_032088;NM_018925;NM_018921;NM_018926;NM_018913;NM_018927;NM_032092;NM_018914;NM_018912;NM_018915;NM_018916;NM_018922;NM_018917;NM_018923;NM_018918;NM_018924;NM_018919;NM_018920;NM_003736	TSS1500;Body;Body;Body;Body;Body;Body;Body;Body;Body;Body;Body;Body;Body;Body;Body;Body;Body;Body;Body
cg02541335	0.0979154	1.83707	0.00149619	0.030673	0.993574	chr6	169073572	OpenSea
cg23451221	-0.0846758	0.265545	0.00149958	0.0265311	0.993574	chr10	135160726	OpenSea	PRAP1;PRAP1	NM_145202;NM_001145201	TSS200;TSS200
cg03978143	0.0683759	4.44917	0.00150043	0.021425	0.993574	chr2	12573866	OpenSea
cg24411833	-0.0780546	5.3675	0.00150209	0.0244603	0.993574	chr10	129911833	OpenSea	MKI67;MKI67	NM_002417;NM_001145966	Body;Body
cg11723361	-0.108287	-7.82267	0.00150292	0.0339361	0.993574	chr5	139781169	Island	ANKHD1;ANKHD1;ANKHD1-EIF4EBP3;ANKHD1;ANKHD1	NM_017747;NM_024668;NM_020690;NM_017978;NM_001197030	TSS1500;TSS1500;TSS1500;TSS1500;TSS1500
cg01722385	-0.0604035	0.746556	0.00150317	0.0189301	0.993574	chr20	48913724	OpenSea	LINC01270	NR_034124	Body
cg08156662	0.0571742	-1.0969	0.00150363	0.0179186	0.993574	chr16	88768194	S_Shelf	RNF166;RNF166;RNF166	NM_178841;NM_001171815;NM_001171816	Body;Body;5'UTR
cg06120235	0.0632042	0.0910345	0.00150447	0.0198095	0.993574	chr8	29211949	S_Shore
cg04793096	0.0744509	-2.6394	0.00150637	0.0233371	0.993574	chr8	23077202	OpenSea	TNFRSF10A	NM_003844	Body
cg25062778	0.0646483	-2.52583	0.00150648	0.0202646	0.993574	chr14	57265268	Island
cg14838804	-0.0709938	5.89688	0.00150739	0.0222549	0.993574	chr10	22039394	OpenSea
cg21300318	0.0893097	0.0553897	0.00150963	0.0280003	0.993574	chr19	4769206	OpenSea	MIR7-3;C19orf30	NR_029607;NR_027148	TSS1500;Body
cg11028316	0.131223	-6.91323	0.00150991	0.0411417	0.993574	chr11	95523085	Island	CEP57;FAM76B	NM_014679;NM_144664	TSS1500;TSS200
cg07715254	-0.128671	-1.36733	0.00151023	0.0403423	0.993574	chr17	40984760	N_Shore	PSME3;PSME3;PSME3;PSME3	NM_005789;NM_176863;NM_001267045;NR_049772	TSS1500;TSS1500;TSS1500;TSS1500
cg12847038	0.0874664	5.14225	0.00151049	0.0274238	0.993574	chr18	40286282	OpenSea
cg25758708	-0.116404	1.79454	0.00151263	0.0365015	0.993574	chr2	231729032	N_Shore	ITM2C;ITM2C;ITM2C;ITM2C;ITM2C	NM_001287241;NM_001287240;NM_001012514;NM_030926;NM_001012516	TSS1500;TSS1500;TSS1500;TSS1500;TSS1500
cg17802076	0.119731	4.79739	0.00151281	0.0375452	0.993574	chr2	134275313	OpenSea	NCKAP5;NCKAP5	NM_207363;NM_207481	5'UTR;5'UTR
cg18167349	-0.107339	-7.34097	0.00151512	0.0336641	0.993574	chr12	51664410	Island	SMAGP;SMAGP	NM_001033873;NM_001031628	TSS1500;TSS1500
cg22606062	-0.164061	-7.12356	0.0015164	0.0514577	0.993574	chr4	77996244	N_Shore	CCNI	NM_006835	5'UTR
cg12548580	0.0607744	3.55724	0.00151692	0.0190624	0.993574	chr15	102224790	OpenSea	TARSL2	NM_152334	Body
cg02100381	0.0842873	2.78916	0.00151693	0.0264375	0.993574	chr13	111025711	OpenSea	COL4A2	NM_001846	Body
cg10906607	-0.0483643	3.21214	0.00151833	0.0151712	0.993574	chr17	72921880	S_Shore	OTOP2	NM_178160	Body
cg22811893	-0.163129	-5.91179	0.00151941	0.0511746	0.993574	chr12	72341534	OpenSea	TPH2	NM_173353	Body
cg05988735	0.0548632	2.14927	0.00151959	0.0172111	0.993574	chr6	126949423	OpenSea
cg10312841	-0.0690848	4.20699	0.00151966	0.0216727	0.993574	chr16	85212827	OpenSea
cg15822889	0.0733135	5.81846	0.00151968	0.0229993	0.993574	chr4	41412457	OpenSea	LIMCH1;LIMCH1;LIMCH1;LIMCH1;LIMCH1	NM_001289124;NM_001112718;NM_001112717;NM_014988;NM_001289122	5'UTR;Body;Body;Body;Body
cg01234750	0.0797325	4.91116	0.00151977	0.0250131	0.993574	chr18	11855656	S_Shelf	GNAL;GNAL;GNAL	NM_001142339;NM_182978;NM_002071	Body;Body;Body
cg06952307	0.101938	-6.88124	0.00152206	0.0319836	0.993574	chr17	47287974	OpenSea	ABI3;GNGT2;ABI3;ABI3;ABI3	NM_001135186;NM_031498;NM_016428;NM_016428;NM_001135186	5'UTR;TSS1500;5'UTR;1stExon;1stExon
cg21410048	0.107408	2.47044	0.00152219	0.0337002	0.993574	chr2	23764799	OpenSea	KLHL29	NM_052920	5'UTR
cg16754082	-0.0929209	4.75924	0.00152496	0.0291597	0.993574	chr6	28888687	N_Shelf	TRIM27	NM_006510	Body
cg23220071	0.0667656	5.61671	0.00152527	0.0209522	0.993574	chr1	227061009	S_Shelf	PSEN2;PSEN2	NM_000447;NM_012486	5'UTR;5'UTR
cg05019016	0.0675146	4.67463	0.00152668	0.0211891	0.993574	chr14	57853771	N_Shelf
cg12929062	0.114706	1.63994	0.00152845	0.0360037	0.993574	chr18	65965879	OpenSea
cg17550784	0.070782	-4.13665	0.00152938	0.0222182	0.993574	chr19	13947404	S_Shelf	LOC284454;MIR27A;MIR24-2;MIR23A	NR_036515;NR_029501;NR_029497;NR_029495	TSS1500;TSS200;TSS1500;Body
cg27131510	-0.0908947	4.9774	0.00152952	0.0285318	0.993574	chr10	124668884	OpenSea	FAM24A	NM_001029888	TSS1500
cg21006542	-0.0771495	4.02136	0.00153296	0.0242222	0.993574	chr2	239868899	OpenSea
cg23687964	0.0813685	0.759221	0.00153417	0.0255487	0.993574	chr8	113275982	OpenSea	CSMD3;CSMD3;CSMD3	NM_198124;NM_052900;NM_198123	Body;Body;Body
cg10041950	0.117394	3.35286	0.00153761	0.0368678	0.993574	chr10	557936	OpenSea	DIP2C	NM_014974	Body
cg04571321	0.0940353	-6.58617	0.00153933	0.0295351	0.993574	chr19	38924347	Island	RYR1;RYR1;RYR1;RYR1	NM_000540;NM_000540;NM_001042723;NM_001042723	1stExon;5'UTR;1stExon;5'UTR
cg14088354	0.0689825	5.09118	0.00154052	0.0216679	0.993574	chr1	233275911	OpenSea	PCNXL2	NM_014801	Body
cg22234665	-0.183426	-2.87364	0.00154149	0.0576188	0.993574	chr3	32526164	OpenSea	CMTM6	NM_017801	Body
cg16175703	-0.0759068	5.3955	0.0015448	0.023849	0.993574	chr2	173106129	OpenSea
cg09200637	0.148294	-7.10985	0.00154632	0.0465966	0.993574	chr19	30112109	OpenSea
cg15220335	-0.0968826	3.03459	0.00154665	0.0304427	0.993574	chr14	67006012	OpenSea	GPHN;GPHN	NM_020806;NM_001024218	Body;Body
cg20795569	0.289781	-8.02387	0.00154805	0.0910634	0.993574	chr1	152085136	Island	TCHH	NM_007113	Body
cg05654385	0.0990621	4.33432	0.0015486	0.0311312	0.993574	chr16	87338132	OpenSea	C16orf95;C16orf95;C16orf95	NM_001195125;NM_001256917;NM_001195124	3'UTR;3'UTR;Body
cg26194484	0.0738385	5.77034	0.00154883	0.0232048	0.993574	chr6	158283187	OpenSea	SNX9	NM_016224	Body
cg09255825	0.11125	2.81329	0.00154904	0.0349624	0.993574	chr20	59653656	OpenSea	LOC100506470	NR_109919	TSS1500
cg15869322	0.106652	4.94119	0.00154942	0.033518	0.993574	chr4	165303164	N_Shore	MARCH1	NM_001166373	5'UTR
cg05953340	-0.0694536	6.05969	0.00154985	0.0218281	0.993574	chr17	879795	N_Shore	NXN	NM_022463	Body
cg21453263	0.069668	5.59864	0.00155073	0.0218967	0.993574	chr1	238065072	OpenSea	LOC100130331	NR_027247	Body
cg04741094	0.0730602	5.36687	0.00155272	0.0229655	0.993574	chr3	197209034	OpenSea
cg21886561	0.0641221	-2.227	0.00155357	0.020157	0.993574	chr12	53730326	OpenSea	SP7;SP7;SP7	NM_001300837;NM_152860;NM_001173467	5'UTR;TSS1500;TSS200
cg01715384	0.0529599	-0.825297	0.00155553	0.0166501	0.993574	chr1	41853403	OpenSea
cg02180699	0.121959	-3.73351	0.00155839	0.0383492	0.993574	chr8	102219149	S_Shore	ZNF706;ZNF706;ZNF706;ZNF706	NM_001042510;NM_016096;NM_001267708;NM_001267709	TSS1500;TSS1500;TSS1500;TSS1500
cg12259191	0.0879888	4.10897	0.00155936	0.0276691	0.993574	chr17	39342026	OpenSea	KRTAP4-1	NM_033060	TSS1500
cg09204302	0.0659858	5.68465	0.00156102	0.0207521	0.993574	chr16	70713462	Island	MTSS1L	NM_138383	Body
cg21221866	-0.0822653	5.21101	0.0015621	0.0258735	0.993574	chr6	91186653	OpenSea
cg23691276	-0.0582649	3.20209	0.00156325	0.0183263	0.993574	chr20	42428858	OpenSea
cg06311447	0.0689499	4.65627	0.00156361	0.0216876	0.993574	chr10	85914709	OpenSea
cg03042573	0.0598567	-1.36878	0.00156506	0.018829	0.993574	chr8	26722336	Island	ADRA1A;ADRA1A;ADRA1A;ADRA1A	NM_033302;NM_033304;NM_033303;NM_000680	1stExon;1stExon;1stExon;1stExon
cg07755794	-0.137974	-3.40092	0.00156526	0.0434029	0.993574	chr22	40579459	OpenSea	TNRC6B;TNRC6B;TNRC6B	NM_001024843;NM_015088;NM_001162501	Body;Body;Body
cg23698969	-0.0806533	5.04336	0.00157108	0.02538	0.993574	chr11	2931165	S_Shore	SLC22A18;SLC22A18	NM_183233;NM_002555	Body;Body
cg10497173	-0.0938102	-5.91424	0.00157145	0.0295209	0.993574	chr16	70557347	Island	COG4;SF3B3	NM_015386;NM_012426	1stExon;TSS1500
cg12191789	0.0847814	4.10592	0.00157237	0.0266811	0.993574	chr6	75856256	OpenSea	COL12A1;COL12A1	NM_004370;NM_080645	Body;Body
cg25324786	0.0936703	3.37151	0.00157403	0.0294814	0.993574	chr13	114866221	N_Shelf	RASA3	NM_007368	Body
cg21652803	0.0625966	3.02273	0.00157454	0.019702	0.993574	chr8	58256341	OpenSea
cg05257291	0.20221	-5.39673	0.00157516	0.0636471	0.993574	chr4	1161247	Island	SPON2;SPON2	NM_012445;NM_001128325	3'UTR;3'UTR
cg01386828	0.108768	3.62231	0.00157708	0.0342394	0.993574	chr5	3980512	OpenSea
cg03193166	0.0654315	-2.86433	0.00157818	0.0205987	0.993574	chr17	63167937	OpenSea	RGS9;RGS9;RGS9	NM_001165933;NM_001081955;NM_003835	Body;Body;Body
cg06199013	-0.0719213	5.87903	0.00157921	0.0226431	0.993574	chr9	4859118	OpenSea	RCL1;RCL1;RCL1;RCL1	NM_005772;NM_001286700;NM_001286699;NM_001286701	Body;Body;Body;Body
cg02862778	-0.0827995	4.76251	0.00159202	0.0260876	0.993574	chr7	127014662	OpenSea	ZNF800	NM_176814	Body
cg02090654	0.108216	3.17551	0.00159231	0.0340962	0.993574	chr7	126698344	OpenSea	MIR592;GRM8;GRM8;GRM8	NR_030323;NM_001127323;NR_028041;NM_000845	TSS200;Body;Body;Body
cg14733048	0.136603	-7.74423	0.00159332	0.0430428	0.993574	chr8	109095782	Island	RSPO2;RSPO2	NM_178565;NM_178565	1stExon;5'UTR
cg26921566	0.102819	1.85599	0.00159963	0.0324096	0.993574	chr19	1497483	S_Shore	REEP6	NM_138393	3'UTR
cg22590568	-0.0732236	4.98462	0.00160081	0.0230824	0.993574	chr6	36235043	OpenSea	PNPLA1;PNPLA1	NM_173676;NM_001145716	5'UTR;5'UTR
cg12627723	-0.0581114	2.25198	0.00160144	0.0183192	0.993574	chr19	2309261	S_Shore	LINGO3	NM_001101391	TSS1500
cg25396301	-0.135241	-3.94637	0.00160259	0.0426365	0.993574	chr1	109186314	OpenSea
cg06395490	0.0798847	5.92597	0.00160262	0.0251848	0.993574	chr11	58370477	OpenSea	ZFP91;ZFP91-CNTF	NM_053023;NR_024091	Body;Body
cg11871567	0.079772	4.92747	0.00160386	0.0251511	0.993574	chr15	57610070	OpenSea	LINC01413	NR_120337	TSS1500
cg18241044	0.0706163	5.1521	0.00160542	0.0222664	0.993574	chr2	224832989	OpenSea
cg08001853	-0.0849389	4.06596	0.00160567	0.0267829	0.993574	chr10	4958974	OpenSea	AKR1C6P	NR_026743	TSS1500
cg24789309	-0.115827	-7.76189	0.00160709	0.0365255	0.993574	chr12	49247147	S_Shore	DDX23	NM_004818	TSS1500
cg10542562	0.0701927	-1.0309	0.00160737	0.0221354	0.993574	chr11	128556382	N_Shelf
cg07832951	-0.0673637	4.6794	0.0016103	0.0212468	0.993574	chr11	119040829	S_Shore	NLRX1;NLRX1;NLRX1;NLRX1	NM_001282358;NM_024618;NM_001282144;NM_001282143	5'UTR;5'UTR;5'UTR;5'UTR
cg02999108	0.0896623	-5.03272	0.00161083	0.0282808	0.993574	chr11	20385518	Island	HTATIP2;HTATIP2;HTATIP2;HTATIP2;HTATIP2;HTATIP2	NM_001098520;NM_001098522;NM_001098522;NM_006410;NM_001098521;NM_001098523	Body;5'UTR;1stExon;5'UTR;5'UTR;TSS200
cg05459971	0.0709599	-0.246881	0.00161126	0.0223824	0.993574	chr5	148520894	N_Shore	ABLIM3	NM_014945	TSS200
cg22526807	-0.111275	-7.89312	0.00161613	0.0351084	0.993574	chr5	137879013	Island	ETF1;ETF1;ETF1	NM_001256302;NM_001291975;NM_004730	TSS200;TSS200;TSS200
cg03187125	0.0861652	5.11702	0.0016165	0.0271867	0.993574	chr3	133002820	OpenSea	TMEM108;TMEM108	NM_001136469;NM_023943	Body;Body
cg23027580	-0.098784	-5.05711	0.00161668	0.0311685	0.993574	chr8	67089513	Island	CRH	NM_000756	Body
cg13475578	0.068821	1.64531	0.00161688	0.0217148	0.993574	chr12	99548550	OpenSea	ANKS1B;ANKS1B;ANKS1B	NM_020140;NM_181670;NM_152788	TSS200;TSS200;Body
cg22513846	0.0875863	3.34155	0.00161839	0.0276381	0.993574	chr2	161693503	OpenSea
cg00393050	-0.0785656	5.38954	0.00161868	0.024792	0.993574	chr3	14435541	OpenSea
cg16823108	0.070872	5.54578	0.00162068	0.0223668	0.993574	chr17	71244216	OpenSea	C17orf80;C17orf80;C17orf80;C17orf80	NM_001100621;NM_001288770;NM_017941;NR_110105	3'UTR;3'UTR;3'UTR;Body
cg13492331	0.0650676	0.211084	0.00162163	0.0205361	0.993574	chr10	14779377	OpenSea	FAM107B	NM_031453	Body
cg15538809	-0.0879276	-4.50132	0.00162385	0.0277545	0.993574	chr18	28658043	OpenSea	DSC2;DSC2	NM_004949;NM_024422	Body;Body
cg09559295	-0.116125	4.37699	0.00162492	0.0366574	0.993574	chr7	37806224	OpenSea
cg01253880	-0.0679841	6.30785	0.00162523	0.021461	0.993574	chr1	31426765	OpenSea	PUM1;PUM1	NM_001020658;NM_014676	Body;Body
cg11296005	-0.111096	-6.64073	0.00162568	0.0350715	0.993574	chr20	62527857	S_Shore	DNAJC5	NM_025219	5'UTR
cg19930652	0.0765992	4.068	0.00162619	0.024182	0.993574	chr8	1786322	OpenSea	ARHGEF10	NM_014629	5'UTR
cg26507589	0.0739887	3.95038	0.00162948	0.0233623	0.993574	chr2	126468025	OpenSea
cg04336593	0.10216	4.65918	0.00163084	0.0322599	0.993574	chr6	42379666	OpenSea	TRERF1;TRERF1	NM_033502;NM_001297573	5'UTR;5'UTR
cg09559572	0.132372	-7.83857	0.00163218	0.0418034	0.993574	chr1	247095453	Island	AHCTF1	NM_015446	TSS1500
cg13001355	-0.0792263	5.1293	0.00163574	0.025025	0.993574	chr2	27608664	OpenSea	PPM1G	NM_177983	Body
cg23053782	0.148553	-7.36055	0.00163743	0.0469277	0.993574	chr3	47844291	Island	DHX30;DHX30	NM_014966;NM_138615	TSS200;TSS200
cg15246232	0.161144	-7.51315	0.00163873	0.0509089	0.993574	chr2	88991544	Island	RPIA	NM_144563	Body
cg02189843	0.0871362	-2.56868	0.00164012	0.0275304	0.993574	chr19	10625775	Island	S1PR5;S1PR5	NM_030760;NM_001166215	5'UTR;5'UTR
cg04160680	0.0804239	5.11961	0.00164281	0.0254136	0.993574	chr17	68786943	OpenSea
cg17342812	0.0616146	3.58723	0.00164351	0.0194707	0.993574	chr9	91495023	OpenSea
cg08987413	-0.0962046	-5.57253	0.00164906	0.030411	0.993574	chr6	166419791	N_Shelf
cg01552792	-0.106014	-6.58376	0.00165253	0.0335185	0.993574	chr16	30969118	Island	SETD1A;SETD1A	NM_014712;NM_014712	1stExon;5'UTR
cg15756420	0.127216	-7.04263	0.00165335	0.0402237	0.993574	chr5	82044645	OpenSea
cg09906941	-0.104177	-5.80283	0.00165362	0.0329396	0.993574	chr14	24701169	N_Shore	NEDD8;GMPR2;GMPR2;GMPR2;GMPR2	NM_006156;NM_001002000;NM_001002002;NM_016576;NM_001002001	Body;TSS1500;TSS1500;TSS1500;TSS1500
cg14048055	0.132414	4.14828	0.0016537	0.0418681	0.993574	chr18	38318458	OpenSea
cg12775904	-0.0688208	5.9394	0.00165395	0.0217608	0.993574	chr17	46571737	S_Shore
cg00640622	0.10629	3.88391	0.0016552	0.0336108	0.993574	chr2	144020044	OpenSea	ARHGAP15	NM_018460	Body
cg19314652	0.0634269	2.36973	0.00165703	0.0200588	0.993574	chr14	79981842	OpenSea	NRXN3;NRXN3;NRXN3;NRXN3;NRXN3;NRXN3	NR_073546;NM_001272020;NM_001105250;NM_138970;NR_073547;NM_004796	Body;Body;Body;Body;Body;Body
cg19136673	0.0675355	-0.845765	0.00165791	0.0213592	0.993574	chr6	32813337	S_Shore	PSMB8;TAP1	NM_004159;NM_000593	TSS1500;3'UTR
cg26516363	0.106428	-6.80439	0.00165924	0.0336623	0.993574	chr4	83934369	Island	LIN54	NM_001115007	TSS1500
cg01806265	-0.0799697	4.91741	0.00165991	0.0252946	0.993574	chr17	48687286	OpenSea	CACNA1G;CACNA1G;CACNA1G;CACNA1G;CACNA1G;CACNA1G;CACNA1G;CACNA1G;CACNA1G;CACNA1G;CACNA1G;CACNA1G;CACNA1G;CACNA1G;CACNA1G;CACNA1G;CACNA1G;CACNA1G;CACNA1G;CACNA1G;CACNA1G;CACNA1G;CACNA1G;CACNA1G;CACNA1G;CACNA1G;CACNA1G;CACNA1G;CACNA1G;CACNA1G;CACNA1G;CACNA1G;CACNA1G;CACNA1G;CACNA1G;CACNA1G;CACNA1G;CACNA1G;CACNA1G;CACNA1G;CACNA1G;CACNA1G;CACNA1G;CACNA1G;CACNA1G;CACNA1G	NM_001256329;NM_001256327;NM_001256325;NM_001256332;NM_018896;NM_198385;NM_001256333;NM_001256359;NM_198384;NM_198382;NM_198383;NR_046054;NR_046057;NR_046054;NR_046058;NR_046057;NR_046056;NR_046055;NM_001256329;NM_001256327;NM_001256325;NM_001256330;NM_001256331;NM_001256332;NM_001256324;NM_198380;NM_198379;NM_198378;NM_198377;NM_198376;NM_018896;NM_198385;NM_198387;NM_001256333;NM_001256359;NM_1…	ExonBnd;ExonBnd;ExonBnd;ExonBnd;ExonBnd;ExonBnd;ExonBnd;ExonBnd;ExonBnd;ExonBnd;ExonBnd;ExonBnd;ExonBnd;Body;Body;Body;Body;Body;Body;Body;Body;Body;Body;Body;Body;Body;Body;Body;Body;Body;Body;Body;Body;Body;Body;Body;Body;Body;Body;Body;Body;Body;Body;Body;Body;Body
cg04264864	0.0810037	5.5316	0.00166081	0.025623	0.993574	chr9	97555991	OpenSea	C9orf3;C9orf3;C9orf3	NM_001193331;NM_032823;NM_001193329	Body;Body;Body
cg02973354	-0.0718267	2.3482	0.0016615	0.022721	0.993574	chr14	70316670	N_Shore
cg06788751	0.0800479	5.33932	0.00166426	0.0253256	0.993574	chr8	6650471	OpenSea
cg08458353	0.0829913	4.53882	0.00166562	0.0262588	0.993574	chr10	116367336	OpenSea	ABLIM1;ABLIM1;ABLIM1	NM_002313;NM_001003407;NM_001003408	Body;Body;Body
cg18237323	0.157986	-5.65416	0.00166654	0.04999	0.993574	chr8	22089615	Island	PHYHIP;PHYHIP;PHYHIP;PHYHIP	NM_014759;NM_001099335;NM_014759;NM_001099335	1stExon;5'UTR;5'UTR;1stExon
cg14508572	0.128836	4.53157	0.00166745	0.0407683	0.993574	chr11	119778410	OpenSea
cg15334431	-0.139355	-3.53803	0.00166784	0.0440979	0.993574	chr2	53203667	OpenSea
cg19154858	0.0811386	-5.87818	0.00167076	0.02568	0.993574	chr13	48807339	Island	ITM2B;ITM2B	NM_021999;NM_021999	1stExon;5'UTR
cg01815783	-0.106346	5.82213	0.00167163	0.0336599	0.993574	chr4	1047043	N_Shelf
cg11575865	0.0847644	4.41286	0.00167188	0.0268293	0.993574	chr10	7420955	OpenSea	SFMBT2;SFMBT2	NM_001029880;NM_001018039	Body;Body
cg26374195	0.13949	-6.47052	0.00167205	0.0441511	0.993574	chr9	77502445	Island	TRPM6;TRPM6;TRPM6	NM_001177311;NM_001177310;NM_017662	TSS200;Body;Body
cg12046591	0.0673474	5.40549	0.00167267	0.0213175	0.993574	chr18	57507539	OpenSea
cg21191743	0.0482605	-1.80473	0.00167349	0.0152766	0.993574	chr1	117724429	OpenSea	VTCN1;VTCN1;VTCN1;VTCN1;VTCN1	NR_045604;NR_045603;NM_001253850;NM_024626;NM_001253849	Body;Body;Body;Body;5'UTR
cg01893097	0.122605	-6.96068	0.00167459	0.0388124	0.993574	chr18	77159784	Island	NFATC1;NFATC1;NFATC1;NFATC1;NFATC1;NFATC1;NFATC1;NFATC1;NFATC1;NFATC1	NM_172389;NM_001278675;NM_172387;NM_001278673;NM_001278672;NM_172388;NM_172390;NM_006162;NM_001278669;NM_001278670	TSS1500;TSS1500;TSS1500;TSS1500;TSS1500;5'UTR;Body;Body;Body;Body
cg17837761	0.0596254	3.30918	0.00167507	0.0188758	0.993574	chr12	90268100	OpenSea
cg00431699	0.100216	-5.37372	0.00167563	0.0317267	0.993574	chr2	63278831	Island	OTX1	NM_014562	5'UTR
cg10276018	-0.0518914	3.67787	0.00167662	0.0164288	0.993574	chr8	640509	S_Shelf	ERICH1	NM_207332	Body
cg01751681	0.0733244	5.82446	0.0016795	0.0232183	0.993574	chr12	3274899	OpenSea	TSPAN9;TSPAN9	NM_001168320;NM_006675	5'UTR;5'UTR
cg17569617	-0.0949721	5.70882	0.00168408	0.0300808	0.993574	chr10	31671030	OpenSea	ZEB1;ZEB1;ZEB1;ZEB1;ZEB1;ZEB1	NM_001174096;NM_001174095;NM_001174093;NM_030751;NM_001174094;NM_001128128	Body;Body;Body;Body;Body;Body
cg00100440	0.0527019	3.07261	0.00168552	0.0166937	0.993574	chr12	78882426	OpenSea
cg05942574	0.0975124	-3.42903	0.0016862	0.030889	0.993574	chr17	48637104	Island	CACNA1G;CACNA1G;CACNA1G;CACNA1G;CACNA1G;CACNA1G;CACNA1G;CACNA1G;CACNA1G;CACNA1G;CACNA1G;CACNA1G;CACNA1G;CACNA1G;CACNA1G	NM_198384;NM_198397;NM_198396;NM_198379;NM_198383;NM_198380;NM_198387;NM_198378;NM_198377;NM_198386;NM_198376;NM_198385;NM_018896;NM_198388;NM_198382	TSS1500;TSS1500;TSS1500;TSS1500;TSS1500;TSS1500;TSS1500;TSS1500;TSS1500;TSS1500;TSS1500;TSS1500;TSS1500;TSS1500;TSS1500
cg03638013	-0.0819927	3.66284	0.0016867	0.0259736	0.993574	chr9	128852322	OpenSea
cg05371273	0.128447	4.77414	0.00168766	0.0406914	0.993574	chr10	38073302	S_Shelf	ZNF248	NM_001267607	Body
cg19777644	0.0755303	5.26374	0.00168863	0.023929	0.993574	chr1	167902728	N_Shelf	BRP44;BRP44;BRP44	NR_026550;NM_015415;NM_001143674	Body;Body;Body
cg12728170	0.0922385	1.56898	0.00168991	0.0292245	0.993574	chr15	44168437	OpenSea	PIN4P1;FRMD5;FRMD5;FRMD5;FRMD5	NR_003571;NR_104455;NM_001286491;NM_032892;NM_001286490	Body;Body;Body;Body;Body
cg02419123	0.0582768	0.891572	0.00169204	0.0184664	0.993574	chr8	20880673	OpenSea
cg04405165	0.0775851	5.83677	0.00169238	0.0245851	0.993574	chr6	70684187	OpenSea	COL19A1	NM_001858	Body
cg16487461	-0.0700129	4.96331	0.00169342	0.0221869	0.993574	chr22	31267236	OpenSea	OSBP2;OSBP2;OSBP2;OSBP2;OSBP2	NM_001282741;NM_001282740;NM_001282738;NM_030758;NM_001282739	Body;Body;Body;Body;Body
cg06902828	0.08027	4.93453	0.00169343	0.0254374	0.993574	chr8	92647788	OpenSea
cg22594323	-0.0848714	-7.61258	0.00169635	0.0268999	0.993574	chr3	50127011	Island	RBM5	NM_005778	5'UTR
cg11174024	0.0468424	1.88745	0.00169793	0.014848	0.993574	chr11	9060910	OpenSea	SCUBE2;SCUBE2	NM_001170690;NM_020974	Body;Body
cg02157117	0.0780758	3.2399	0.00170183	0.0247536	0.993574	chr18	28286221	OpenSea
cg14503204	0.104747	5.16099	0.00170205	0.03321	0.993574	chr8	14017320	OpenSea	SGCZ	NM_139167	Body
cg09852798	-0.0863105	5.2025	0.00170251	0.0273654	0.993574	chr10	135333425	N_Shore
cg20940127	0.062418	-2.48611	0.00170425	0.019792	0.993574	chr6	134238091	OpenSea
cg03531778	0.070223	5.86359	0.00170705	0.0222703	0.993574	chr12	105498294	N_Shelf
cg16934017	0.0870601	5.01944	0.00171095	0.0276159	0.993574	chr17	38924455	OpenSea	KRT26	NM_181539	Body
cg17576828	0.113712	4.83671	0.00171182	0.0360719	0.993574	chr12	95104567	OpenSea
cg12120868	0.0909123	4.19598	0.00171746	0.0288482	0.993574	chr10	114635326	OpenSea
cg26043567	0.0627915	5.34169	0.00171755	0.0199251	0.993574	chr17	47007623	OpenSea	SNF8	NM_007241	3'UTR
cg09662150	-0.181581	-6.57767	0.00171759	0.0576197	0.993574	chr8	38854671	Island	TM2D2;ADAM9;ADAM9;TM2D2;TM2D2;ADAM9;ADAM9;TM2D2	NM_001024381;NR_027638;NR_027878;NM_031940;NM_078473;NR_027639;NM_003816;NM_001024380	TSS1500;Body;Body;TSS1500;TSS1500;Body;1stExon;TSS1500
cg20997448	-0.0772101	5.25202	0.00171846	0.0245016	0.993574	chr5	76814429	OpenSea
cg12339921	0.0673421	2.62767	0.00171913	0.0213709	0.993574	chr14	59823687	OpenSea	DAAM1;DAAM1	NM_001270520;NM_014992	Body;Body
cg05649409	0.0718141	2.86154	0.00171945	0.0227905	0.993574	chr13	24008877	OpenSea	SACS	NM_014363	TSS1500
cg11406050	-0.122247	-7.07125	0.00172043	0.0387977	0.993574	chr17	34998759	Island
cg26360766	-0.086114	0.747913	0.00172128	0.0273314	0.993574	chr9	113799433	N_Shore	LPAR1;LPAR1	NM_001401;NM_057159	5'UTR;5'UTR
cg27031632	0.107905	-3.38478	0.00172137	0.0342475	0.993574	chr12	57522318	S_Shore	LRP1;LRP1	NM_002332;NM_002332	5'UTR;1stExon
cg14990252	0.060068	2.98798	0.00172289	0.0190664	0.993574	chr10	125691586	OpenSea
cg13027729	0.0763908	4.94354	0.0017243	0.0242494	0.993574	chr1	60111585	OpenSea	FGGY;FGGY;FGGY;FGGY;FGGY	NM_018291;NM_001244714;NM_001113411;NM_001278224;NR_103473	Body;Body;Body;Body;Body
cg17663774	0.0877692	-2.20371	0.00172501	0.0278624	0.993574	chr11	124716366	S_Shelf
cg07584331	-0.194298	-3.15157	0.00172724	0.0616875	0.993574	chr16	3451821	S_Shore	ZNF174;ZNF174;ZNF174;ZNF174;ZSCAN32;ZSCAN32;ZSCAN32;ZSCAN32	NM_003450;NM_001032292;NM_003450;NM_001032292;NM_001284529;NM_001284528;NM_001284527;NM_017810	5'UTR;5'UTR;1stExon;1stExon;TSS1500;TSS1500;TSS1500;TSS1500
cg13558262	-0.20236	-5.44906	0.00172892	0.0642531	0.993574	chr6	24283533	OpenSea	DCDC2;DCDC2	NM_016356;NM_001195610	Body;Body
cg00633015	-0.0520763	3.8657	0.00172998	0.0165361	0.993574	chr19	52196032	OpenSea	SPACA6P-AS;MIR125A;SPACA6P;MIRLET7E	NR_108100;NR_029693;NR_024330;NR_029482	Body;TSS1500;TSS1500;TSS200
cg14839837	-0.0857853	2.70656	0.00173257	0.0272439	0.993574	chr8	1834174	S_Shelf	ARHGEF10	NM_014629	Body
cg07420190	0.1309	-6.92785	0.00173258	0.0415714	0.993574	chr1	220702225	Island	MARK1	NM_018650	Body
cg19146924	0.196671	-5.01922	0.00173269	0.0624598	0.993574	chr11	64794755	N_Shore	SNX15;SNX15	NM_013306;NM_147777	TSS200;TSS200
cg13547629	-0.12281	4.96112	0.00173375	0.0390047	0.993574	chr17	7167532	S_Shore	CLDN7;CLDN7;CLDN7	NM_001185023;NM_001307;NM_001185022	TSS1500;TSS1500;TSS1500
cg08253760	0.0570136	5.76287	0.00173408	0.018108	0.993574	chr7	27774282	OpenSea
cg10081681	0.0807943	4.30242	0.00173616	0.0256638	0.993574	chr10	105219068	S_Shore	CALHM1	NM_001001412	TSS1500
cg07465275	-0.0690309	4.22466	0.00173785	0.0219293	0.993574	chr11	65375203	Island	MAP3K11	NM_002419	Body
cg08228724	0.184169	-6.76983	0.00173834	0.0585071	0.993574	chr1	78444087	N_Shore	FUBP1	NM_003902	Body
cg01663383	0.0847913	3.37357	0.00173842	0.0269368	0.993574	chr19	34676534	OpenSea	LSM14A;LSM14A	NM_001114093;NM_015578	Body;Body
cg15932817	0.108494	1.36873	0.00173891	0.0344677	0.993574	chr11	15122340	OpenSea
cg09986070	0.151065	4.59109	0.00173952	0.0479937	0.993574	chr9	97372750	OpenSea	FBP1;FBP1	NM_000507;NM_001127628	Body;Body
cg06823437	-0.113666	1.53111	0.0017401	0.0361131	0.993574	chr18	60471110	OpenSea	PHLPP1	NM_194449	Body
cg13746740	0.101967	-1.35071	0.00174142	0.0323986	0.993574	chr11	128554939	OpenSea
cg13807925	0.0731039	5.1355	0.00174162	0.0232279	0.993574	chr5	80886768	OpenSea	SSBP2;SSBP2;SSBP2;SSBP2;SSBP2;SSBP2	NM_001256736;NM_001256735;NM_001256734;NM_001256733;NM_001256732;NM_012446	Body;Body;Body;Body;Body;Body
cg03070977	0.110411	4.05515	0.00174415	0.0350868	0.993574	chr20	61999021	N_Shelf
cg18428265	0.0785315	-0.856862	0.00174586	0.0249582	0.993574	chr2	101437805	S_Shore	NPAS2	NM_002518	5'UTR
cg26965236	0.0953337	3.94014	0.0017461	0.0302986	0.993574	chr8	13434991	OpenSea
cg24893844	0.123582	-6.8272	0.00174958	0.0392837	0.993574	chr6	32811694	Island	PSMB8;PSMB8	NM_004159;NM_148919	Body;1stExon
cg13953394	0.0793762	5.14989	0.00174994	0.0252323	0.993574	chr12	5355214	OpenSea
cg00518264	-0.0697575	4.7778	0.0017517	0.0221768	0.993574	chr11	69305806	OpenSea	LINC01488;LINC01488;LINC01488;LINC01488	NR_120543;NR_120542;NR_120545;NR_120544	Body;Body;Body;Body
cg17543047	0.0824851	-5.01452	0.00175175	0.0262231	0.993574	chr15	74422402	Island	ISLR2;ISLR2;LOC283731;ISLR2;ISLR2	NM_020851;NM_001130136;NR_027073;NM_001130137;NM_001130138	TSS1500;5'UTR;TSS1500;5'UTR;TSS200
cg25063300	-0.12888	-6.71877	0.00175347	0.0409765	0.993574	chr4	110651173	Island	PLA2G12A;PLA2G12A	NM_030821;NM_030821	1stExon;5'UTR
cg11696348	0.0953004	2.08555	0.0017539	0.0303008	0.993574	chr11	128795152	OpenSea
cg22291153	0.0852306	3.70883	0.00175711	0.0271038	0.993574	chr13	27232582	OpenSea	WASF3	NM_006646	Body
cg23418591	0.0869828	-3.55465	0.00175773	0.0276619	0.993574	chr20	57090317	S_Shore	APCDD1L	NM_153360	TSS1500
cg21570209	-0.107829	1.16698	0.00175785	0.0342916	0.993574	chr19	46367987	S_Shore	FOXA3;SYMPK	NM_004497;NM_004819	Body;TSS1500
cg07668623	-0.127154	-8.79439	0.00176068	0.0404433	0.993574	chr13	60971344	Island	TDRD3;TDRD3;TDRD3	NM_001146071;NM_030794;NM_001146070	5'UTR;5'UTR;TSS200
cg12302651	-0.0700381	1.70386	0.00176075	0.0222769	0.993574	chr10	129118697	OpenSea	DOCK1;DOCK1	NM_001290223;NM_001380	Body;Body
cg20540963	0.162644	-6.99991	0.0017624	0.0517365	0.993574	chr7	99699158	Island	MCM7;MCM7;MCM7;MCM7;MCM7;AP4M1;AP4M1	NM_001278595;NM_182776;NM_001278595;NM_005916;NM_005916;NM_004722;NM_004722	5'UTR;TSS1500;1stExon;1stExon;5'UTR;5'UTR;1stExon
cg08110058	0.0762664	5.36814	0.00176343	0.0242614	0.993574	chr1	3073806	S_Shore	PRDM16;PRDM16	NM_022114;NM_199454	Body;Body
cg12732855	-0.0708623	4.9819	0.00176703	0.0225466	0.993574	chr6	47749793	OpenSea	OPN5;OPN5	NM_181744;NM_181744	5'UTR;1stExon
cg23904004	0.0852266	5.50192	0.00176828	0.0271188	0.993574	chr15	35414083	Island
cg14923274	-0.072847	5.37907	0.0017687	0.0231802	0.993574	chr3	48725172	S_Shore
cg10596651	-0.137553	-6.59259	0.0017746	0.0437838	0.993574	chr1	109736360	OpenSea	KIAA1324;KIAA1324;KIAA1324;KIAA1324	NM_001284353;NM_020775;NM_001267048;NM_001284352	Body;Body;Body;Body
cg08515635	0.109047	-1.16657	0.00177722	0.0347151	0.993574	chr2	30121938	OpenSea	ALK	NM_004304	Body
cg00646241	0.0979806	3.98619	0.00178278	0.0312013	0.993574	chr11	70563878	Island	SHANK2	NM_012309	Body
cg12051819	-0.127166	-1.44571	0.00178619	0.0405027	0.993574	chr1	114717638	OpenSea
cg01853986	0.0776457	2.09467	0.00178784	0.0247324	0.993574	chr6	161350484	N_Shore
cg22574675	-0.0996661	3.75054	0.00178862	0.0317479	0.993574	chr10	134697150	N_Shore
cg06359302	-0.0436338	2.28967	0.001789	0.0138995	0.993574	chr17	79917014	N_Shore	NOTUM	NM_178493	Body
cg14283887	0.0961384	4.3029	0.00179145	0.0306288	0.993574	chr8	35040351	OpenSea
cg07190966	-0.116865	-6.83637	0.00179222	0.0372334	0.993574	chr4	24586472	S_Shore	DHX15	NM_001358	TSS1500
cg04281204	-0.0681745	5.73443	0.00179241	0.0217209	0.993574	chr10	115612802	N_Shore	DCLRE1A	NM_014881	1stExon
cg09682129	-0.0663907	4.05479	0.00179314	0.0211533	0.993574	chr4	123300788	Island	ADAD1;ADAD1;ADAD1;ADAD1	NM_139243;NM_001159285;NM_001159295;NM_001159295	5'UTR;5'UTR;1stExon;5'UTR
cg01811683	0.10646	3.70205	0.00179385	0.0339215	0.993574	chr20	57078965	OpenSea	APCDD1L;APCDD1L;APCDD1L	NM_001304787;NM_153360;NR_130908	Body;Body;Body
cg23341486	0.0756941	4.37003	0.00179416	0.0241189	0.993574	chr13	112681551	OpenSea	LINC00403	NR_120392	Body
cg09532836	-0.0630977	5.89665	0.00179604	0.0201072	0.993574	chr17	34180621	OpenSea
cg11754382	0.0667686	4.68628	0.00179656	0.0212776	0.993574	chr2	223901462	OpenSea
cg04124697	0.170208	-7.15874	0.00179712	0.0542428	0.993574	chr19	1103788	Island	GPX4;GPX4;GPX4	NM_001039848;NM_002085;NM_001039847	TSS1500;TSS200;TSS200
cg07363112	-0.100322	-6.8197	0.00179723	0.0319714	0.993574	chr3	125239413	S_Shore	SNX4	NM_003794	TSS1500
cg18481222	0.0583817	-1.08728	0.00179842	0.0186067	0.993574	chr14	55321129	OpenSea	GCH1;GCH1;GCH1;GCH1	NM_001024071;NM_001024070;NM_000161;NM_001024024	Body;Body;Body;Body
cg19804476	0.0976954	5.35381	0.0017999	0.0311388	0.993574	chr11	113295509	OpenSea	DRD2;DRD2	NM_000795;NM_016574	5'UTR;5'UTR
cg13077752	-0.0730054	5.40113	0.00180011	0.0232695	0.993574	chr18	42322634	N_Shore	SETBP1;SETBP1	NM_001130110;NM_015559	Body;Body
cg06710522	-0.767591	-8.75831	0.00180022	0.244661	0.993574	chr17	45908972	Island	MRPL10;LRRC46	NM_145255;NM_033413	TSS200;TSS200
cg00080012	-0.115573	-7.7753	0.00180058	0.0368383	0.993574	chr11	85955689	N_Shore	EED;EED	NM_152991;NM_003797	TSS200;TSS200
cg25047469	0.0410041	-2.61791	0.00180206	0.0130709	0.993574	chr15	90198526	Island	KIF7	NM_198525	5'UTR
cg11664903	0.0757565	1.77783	0.00180251	0.0241494	0.993574	chr11	126875844	S_Shelf
cg14876280	0.0676636	1.79434	0.00180373	0.021571	0.993574	chr3	62187784	OpenSea	PTPRG	NM_002841	Body
cg13086606	0.0977673	-6.29755	0.00180378	0.0311681	0.993574	chr15	69452796	Island	MIR548H4;GLCE	NR_031680;NM_015554	Body;TSS200
cg26097115	0.100757	3.27058	0.00180569	0.0321244	0.993574	chr6	36915567	OpenSea	PI16	NM_001199159	TSS1500
cg24317085	0.0872749	3.85386	0.00180736	0.0278284	0.993574	chr12	55640958	OpenSea	OR6C74	NM_001005490	TSS200
cg08112137	-0.0652757	3.73095	0.00180852	0.020815	0.993574	chr6	170040005	OpenSea	WDR27	NM_182552	Body
cg08299265	0.0844225	-1.12761	0.00180929	0.0269216	0.993574	chr12	54354414	N_Shore
cg06678608	0.0691708	5.59989	0.00181002	0.0220588	0.993574	chr16	78198090	OpenSea	WWOX;WWOX;WWOX;WWOX;WWOX;WWOX;WWOX;WWOX	NM_130791;NM_016373;NM_001291997;NR_120436;NR_120436;NM_130791;NM_016373;NM_001291997	ExonBnd;ExonBnd;ExonBnd;ExonBnd;Body;Body;Body;Body
cg17314961	-0.0793014	5.04896	0.00181331	0.0252939	0.993574	chr13	113435942	OpenSea	ATP11A;ATP11A	NM_015205;NM_032189	Body;Body
cg01417714	-0.0401464	2.29253	0.00181368	0.0128053	0.993574	chr1	155223726	N_Shore	FAM189B;FAM189B	NM_198264;NM_006589	Body;Body
cg09589951	0.0758571	2.4986	0.00181417	0.0241964	0.993574	chr2	236897639	OpenSea	AGAP1;AGAP1	NM_014914;NM_001037131	Body;Body
cg05022368	0.0812825	4.97533	0.00181488	0.0259279	0.993574	chr8	38858552	S_Shelf	ADAM9;ADAM9;ADAM9;ADAM9	NM_003816;NR_027638;NR_027878;NR_027639	Body;Body;Body;Body
cg23384428	0.0720447	5.37074	0.00181576	0.0229822	0.993574	chr6	154406841	OpenSea	OPRM1;OPRM1;OPRM1;OPRM1;OPRM1;OPRM1;OPRM1;OPRM1;OPRM1;OPRM1;OPRM1;OPRM1;OPRM1	NM_001145283;NM_001008503;NM_001145287;NM_001145281;NM_001145282;NM_000914;NM_001145286;NM_001145284;NM_001008504;NM_001145285;NM_001145280;NM_001145279;NM_001008505	Body;Body;TSS1500;Body;Body;Body;Body;Body;Body;Body;5'UTR;Body;Body
cg04251405	0.0529646	3.06247	0.00181833	0.016898	0.993574	chr11	29328150	OpenSea
cg10217613	-0.0693271	2.94521	0.00181888	0.0221189	0.993574	chr16	1950318	OpenSea
cg23052037	0.0744605	5.04541	0.00182064	0.023759	0.993574	chr15	26229322	OpenSea
cg24493244	-0.0677263	5.3591	0.00182104	0.0216106	0.993574	chr22	20900778	OpenSea	MED15;MED15;MED15;MED15;MED15;MED15	NM_001293236;NM_015889;NM_001003891;NM_001293234;NM_001293235;NM_001293237	Body;Body;Body;Body;Body;Body
cg01073369	-0.0804668	-7.09689	0.00182536	0.0256818	0.993574	chr19	1269071	Island	CIRBP;CIRBP;CIRBP;C19orf23	NM_001280;NR_023313;NR_023312;NR_027271	TSS200;TSS200;TSS200;Body
cg13589942	0.088139	5.10529	0.00182546	0.0281306	0.993574	chr3	56104883	OpenSea	ERC2	NM_015576	Body
cg09549649	-0.0673116	4.65216	0.00182762	0.0214857	0.993574	chr8	144887282	Island	SCRIB;SCRIB	NM_015356;NM_182706	Body;Body
cg19985477	-0.130211	-6.31139	0.00182866	0.0415652	0.993574	chr13	78712201	OpenSea	RNF219-AS1	NR_047001	Body
cg17126555	0.0735041	3.21969	0.0018291	0.0234642	0.993574	chr19	10445516	Island	RAVER1;ICAM3	NM_133452;NM_002162	TSS1500;Body
cg22505977	0.0953357	2.83454	0.0018293	0.0304336	0.993574	chr5	150727459	OpenSea	SLC36A2	NM_181776	TSS1500
cg10431430	0.0691277	3.55041	0.00182999	0.0220682	0.993574	chr13	90550026	OpenSea
cg09282289	-0.159053	-4.96084	0.00183137	0.0507794	0.993574	chr13	20532174	Island	ZMYM2;ZMYM2	NM_003453;NM_197968	TSS1500;TSS1500
cg16927481	-0.0885301	3.89767	0.00183258	0.0282659	0.993574	chr13	19980458	OpenSea
cg15800360	-0.122626	0.454195	0.00183275	0.0391523	0.993574	chr6	127374788	OpenSea
cg05799204	-0.106277	-3.92824	0.00183324	0.0339333	0.993574	chr10	43761519	OpenSea	RASGEF1A	NM_145313	5'UTR
cg01474253	0.074385	4.46523	0.00183365	0.023751	0.993574	chr18	37259542	OpenSea	LINC00669	NR_024391	Body
cg07748753	0.114513	4.23178	0.00183416	0.0365648	0.993574	chr16	89225822	Island	C16orf81	NR_024347	Body
cg08737640	0.0724491	3.43379	0.00183565	0.0231353	0.993574	chr17	9683136	OpenSea	DHRS7C;DHRS7C;DHRS7C;DHRS7C	NM_001105571;NM_001220493;NM_001105571;NM_001220493	ExonBnd;ExonBnd;Body;Body
cg11283514	0.0728303	4.02487	0.00183613	0.0232576	0.993574	chr4	82126708	OpenSea	PRKG2;PRKG2	NM_001282485;NM_006259	5'UTR;5'UTR
cg20305576	0.0964558	3.97724	0.00183679	0.0308032	0.993574	chr13	28968481	OpenSea	FLT1;FLT1;FLT1	NM_002019;NM_001160030;NM_001159920	Body;Body;Body
cg13140167	0.119499	-5.66587	0.00183697	0.0381624	0.993574	chr22	33454504	Island	SYN3	NM_001135774	TSS200
cg04306098	0.0763782	4.31512	0.00184074	0.0243964	0.993574	chr12	110038893	OpenSea
cg04156464	-0.178994	-4.82106	0.00184242	0.0571786	0.993574	chr16	56224504	N_Shore	GNAO1;GNAO1;LOC283856	NM_020988;NM_138736;NR_027078	TSS1500;TSS1500;Body
cg12671602	0.0764645	3.74747	0.00184363	0.0244277	0.993574	chr1	241576849	OpenSea
cg11765615	0.130808	2.61566	0.00184442	0.0417901	0.993574	chr11	83695136	OpenSea	DLG2;DLG2;DLG2;DLG2;DLG2	NM_001142700;NM_001206769;NM_001300983;NM_001364;NM_001142699	Body;Body;Body;Body;Body
cg09613911	-0.069843	5.14879	0.00184684	0.022316	0.993574	chr3	11888722	S_Shore	TAMM41;TAMM41;TAMM41	NM_138807;NM_001284401;NR_104314	TSS1500;TSS1500;TSS1500
cg03677492	-0.115899	-5.83353	0.00184823	0.0370343	0.993574	chr17	80273969	N_Shelf	CD7	NM_006137	Body
cg04343363	0.0837058	4.76146	0.0018505	0.0267505	0.993574	chr5	125165293	OpenSea
cg14196263	-0.154568	-3.39121	0.00185106	0.0493978	0.993574	chr13	110443740	S_Shelf
cg09354241	0.0830599	-5.18038	0.00185175	0.0265458	0.993574	chr4	13540850	N_Shelf
cg03263514	-0.164872	-7.01458	0.00185363	0.052698	0.993574	chr22	19711036	Island	GP1BB;SEPT5	NM_000407;NM_002688	TSS200;3'UTR
cg22888023	-0.0745885	5.1834	0.00185379	0.0238409	0.993574	chr17	78820004	S_Shore	RPTOR;RPTOR	NM_001163034;NM_020761	Body;Body
cg08864240	0.0867992	5.86346	0.00185631	0.0277474	0.993574	chr6	39895717	OpenSea	MOCS1;MOCS1;MOCS1;MOCS1;MOCS1	NR_033233;NM_005943;NM_001075098;NM_005942;NM_138928	Body;TSS1500;Body;TSS1500;TSS1500
cg04606367	-0.130439	-5.45759	0.0018564	0.0416982	0.993574	chr7	121946213	Island
cg23198235	0.105705	3.63514	0.00185678	0.0337918	0.993574	chr13	20977165	OpenSea
cg08519575	0.112647	-5.35256	0.00185872	0.0360148	0.993574	chr8	79578124	Island	FAM164A	NM_016010	TSS200
cg00299942	0.103117	3.93408	0.00186025	0.0329704	0.993574	chr15	40984679	N_Shelf
cg14300568	-0.112874	-5.48435	0.00186179	0.036093	0.993574	chr18	57567149	Island	PMAIP1	NM_021127	TSS200
cg13335775	0.0923039	2.43026	0.00186212	0.0295159	0.993574	chr12	98151686	OpenSea	LOC643711	NR_077240	TSS1500
cg05021842	0.10545	0.354744	0.00186238	0.03372	0.993574	chr19	3464940	Island
cg19548004	0.105529	-6.56203	0.00186405	0.0337483	0.993574	chr17	27046597	N_Shore	RAB34;RAB34;SNORD42B;RAB34;RPL23A;RAB34;RAB34	NM_001144943;NM_001142624;NR_000013;NR_024575;NM_000984;NR_024579;NM_001142625	TSS1500;TSS1500;TSS1500;TSS1500;TSS1500;TSS1500;TSS1500
cg25264101	-0.0442922	3.11272	0.00186434	0.0141649	0.993574	chr19	14064374	S_Shore	PODNL1;DCAF15;PODNL1	NM_001146255;NM_138353;NM_001146254	TSS200;Body;TSS200
cg17690832	-0.100245	-6.62577	0.00186462	0.0320594	0.993574	chr4	185939537	Island	HELT	NM_001029887	TSS1500
cg10263335	-0.101598	-2.61747	0.00186513	0.032493	0.993574	chr15	50646099	N_Shore	LOC100129387;GABPB1;GABPB1;FLJ10038;GABPB1;GABPB1;GABPB1	NR_024490;NM_016655;NM_005254;NR_026891;NM_016654;NM_002041;NM_181427	TSS1500;5'UTR;5'UTR;Body;5'UTR;5'UTR;5'UTR
cg12343754	0.101963	3.9429	0.00186635	0.0326117	0.993574	chr18	13895861	OpenSea	MC2R;MC2R	NM_000529;NM_001291911	5'UTR;5'UTR
cg11682905	-0.115425	-8.23279	0.00186737	0.0369192	0.993574	chr16	20397264	OpenSea	PDILT	NM_174924	Body
cg11693429	-0.0788593	4.6963	0.00186776	0.0252241	0.993574	chr11	59804155	OpenSea
cg26579892	0.13646	-5.42062	0.00186787	0.0436487	0.993574	chr11	63381077	N_Shore	PLA2G16;PLA2G16	NM_001128203;NM_007069	Body;Body
cg14942134	0.0893175	-5.87634	0.0018687	0.0285706	0.993574	chr8	94929220	Island	PDP1;PDP1;PDP1;PDP1;PDP1;PDP1;PDP1;PDP1	NM_001161780;NM_001161780;NM_018444;NM_001161778;NM_001161781;NM_018444;NM_001161779;NM_001161779	1stExon;5'UTR;1stExon;TSS1500;TSS200;5'UTR;5'UTR;1stExon
cg11972620	-0.0676632	6.0613	0.00186891	0.0216442	0.993574	chr10	100011696	OpenSea	LOXL4	NM_032211	Body
cg06770016	0.068951	2.1928	0.00186999	0.0220573	0.993574	chr17	64929930	OpenSea
cg25171089	0.109685	-7.61258	0.00186999	0.0350881	0.993574	chr10	5708825	S_Shore	ASB13;ASB13	NR_024581;NM_024701	TSS1500;TSS1500
cg14949125	0.0743408	5.58412	0.00187176	0.0237837	0.993574	chr15	67382149	OpenSea	SMAD3	NM_005902	Body
cg09175915	-0.0667713	5.966	0.0018718	0.021362	0.993574	chr1	10683577	OpenSea	PEX14	NM_004565	Body
cg05445244	0.122475	2.47163	0.00187282	0.0391852	0.993574	chr4	164251942	N_Shore	NPY1R	NM_000909	5'UTR
cg16691251	0.128014	5.23685	0.00187376	0.0409595	0.993574	chr5	66510806	OpenSea
cg03326399	-0.0882957	5.61164	0.00187522	0.0282532	0.993574	chr7	127720983	OpenSea	SND1;MIR593	NM_014390;NR_030324	Body;TSS1500
cg13721169	0.100073	0.335562	0.00187563	0.0320225	0.993574	chr12	108168824	N_Shore	ASCL4;ASCL4	NM_203436;NM_203436	1stExon;5'UTR
cg12661873	0.122562	5.99058	0.00187579	0.0392191	0.993574	chr2	36761999	OpenSea	CRIM1	NM_016441	Body
cg19566133	-0.0808779	5.45447	0.00187605	0.0258807	0.993574	chr1	39408054	OpenSea	RHBDL2	NM_017821	TSS1500
cg05528916	0.134993	-7.77763	0.00187688	0.0431994	0.993574	chr11	10955626	S_Shelf
cg22397846	0.0731889	4.89881	0.00187778	0.0234224	0.993574	chr1	167675151	OpenSea	RCSD1	NM_052862	3'UTR
cg24399712	1.60891	-4.67653	0.00187787	0.514895	0.993574	chr22	39784796	Island
cg27409230	0.0874195	-5.51399	0.00187872	0.0279778	0.993574	chr16	3627646	OpenSea	NLRC3;NLRC3	NM_178844;NR_075083	TSS1500;TSS1500
cg04940824	-0.083254	3.59013	0.00188057	0.0266472	0.993574	chr1	178387032	OpenSea	RASAL2;RASAL2	NM_004841;NM_170692	Body;Body
cg12983884	0.0851619	4.68616	0.00188349	0.0272619	0.993574	chr9	119958324	OpenSea	ASTN2	NM_014010	Body
cg00131115	0.0961293	2.46173	0.00188418	0.0307739	0.993574	chr13	82312779	OpenSea
cg10152684	0.0803086	5.18328	0.00188451	0.0257096	0.993574	chr7	2423467	S_Shelf
cg26407106	-0.146475	-7.04421	0.00188588	0.046895	0.993574	chr4	153701043	Island	ARFIP1;ARFIP1;TIGD4;ARFIP1	NM_014447;NM_001025593;NM_145720;NM_001025595	TSS200;TSS200;TSS200;TSS200
cg24580593	-0.134765	5.01915	0.00188704	0.0431486	0.993574	chr5	131994061	S_Shore	IL13	NM_002188	Body
cg19759804	0.0960956	-5.58666	0.00188765	0.0307686	0.993574	chr1	25889155	OpenSea	LDLRAP1	NM_015627	Body
cg06675478	0.0701282	-2.57483	0.00189017	0.022457	0.993574	chr13	112721786	Island	SOX1	NM_005986	TSS200
cg17145690	0.0486091	-1.35996	0.0018918	0.0155673	0.993574	chr14	92926183	OpenSea	SLC24A4;SLC24A4;SLC24A4	NM_153647;NM_153646;NM_153648	Body;Body;Body
cg11577171	-0.0418659	3.41939	0.00189198	0.0134079	0.993574	chr12	49440083	OpenSea	KMT2D	NM_003482	Body
cg03694660	0.0486441	2.29509	0.00189323	0.0155796	0.993574	chr3	9297433	OpenSea
cg09903698	0.0768871	5.52916	0.00189493	0.0246274	0.993574	chr2	218798029	OpenSea	TNS1	NM_022648	5'UTR
cg22211731	-0.0805054	5.3898	0.0018962	0.025788	0.993574	chr5	132167026	S_Shore	SHROOM1	NM_001172700	TSS1500
cg20401393	-0.147715	-7.02574	0.00189642	0.0473175	0.993574	chr6	4135757	Island	PECI;PECI;PECI;PECI;PECI	NM_006117;NM_006117;NR_028588;NM_001166010;NM_206836	1stExon;5'UTR;Body;TSS200;1stExon
cg03641715	0.0778548	4.42185	0.0018986	0.0249419	0.993574	chr8	93425959	OpenSea
cg09012003	0.0706036	5.51033	0.00189893	0.0226193	0.993574	chr12	97383138	OpenSea
cg24370066	0.0694075	4.38717	0.00190019	0.0222375	0.993574	chr13	45779607	OpenSea	GTF2F2	NM_004128	Body
cg03732007	0.246153	-2.89025	0.00190032	0.0788656	0.993574	chr1	2071316	OpenSea	PRKCZ;PRKCZ;PRKCZ	NM_001033582;NM_002744;NM_001033581	5'UTR;Body;5'UTR
cg22606658	-0.110921	-6.59568	0.00190136	0.0355403	0.993574	chr4	150999251	Island	DCLK2;DCLK2	NM_001040261;NM_001040260	TSS1500;TSS1500
cg05029983	-0.0731867	4.40056	0.00190146	0.0234498	0.993574	chr4	2068254	S_Shore	NAT8L	NM_178557	3'UTR
cg06033276	0.0384445	0.397417	0.00190333	0.0123192	0.993574	chr14	91880200	N_Shelf	CCDC88C	NM_001080414	Body
cg00582970	0.0839716	1.89748	0.00190344	0.0269081	0.993574	chr17	60947793	OpenSea
cg27332470	-0.0480379	3.78318	0.00190425	0.0153941	0.993574	chr11	118772428	OpenSea	BCL9L	NM_182557	Body
cg14483935	0.0964343	3.60886	0.00190447	0.0309033	0.993574	chr12	49526778	S_Shore	TUBA1B	NM_006082	TSS1500
cg25492056	-0.0736508	5.32341	0.00190511	0.0236029	0.993574	chr12	97885594	OpenSea	MIR1251;RMST	NR_031653;NR_024037	TSS200;Body
cg07264079	-0.179743	-2.60679	0.00190532	0.0576031	0.993574	chr15	26375655	OpenSea	LINC00929	NR_038852	Body
cg26557744	0.084896	3.85426	0.00190569	0.0272074	0.993574	chr3	116515339	OpenSea
cg23399774	0.087215	3.3066	0.00190668	0.027952	0.993574	chr8	85767698	OpenSea	RALYL;RALYL;RALYL;RALYL;RALYL;RALYL	NM_001100391;NM_001287243;NM_001100393;NM_001100392;NM_173848;NM_001287244	Body;Body;Body;Body;Body;Body
cg15482168	-0.100065	-5.47685	0.00190677	0.0320704	0.993574	chr19	53970942	Island	ZNF813	NM_001004301	TSS200
cg18292124	0.119343	-0.490296	0.00190763	0.0382506	0.993574	chr6	30966657	OpenSea
cg25890743	-0.0850508	5.58256	0.00190984	0.0272627	0.993574	chr20	57250546	OpenSea	STX16;STX16;STX16;STX16;STX16;STX16;STX16;STX16;STX16-NPEPL1	NR_037943;NR_037942;NR_037941;NM_003763;NM_001134773;NM_001001433;NM_001134772;NM_001204868;NR_037945	Body;Body;Body;Body;Body;Body;Body;Body;Body
cg20512127	-0.0589069	3.59833	0.00190998	0.0188826	0.993574	chr14	105640389	OpenSea	NUDT14	NM_177533	Body
cg25109908	-0.102935	-6.64731	0.00191008	0.0329958	0.993574	chr6	31588831	Island	BAT2	NM_080686	5'UTR
cg07622996	0.120252	-5.97082	0.00191037	0.0385474	0.993574	chr2	14772564	Island	FAM84A	NM_145175	TSS1500
cg19764348	0.0638581	5.33856	0.0019117	0.0204714	0.993574	chr12	63352052	OpenSea
cg27391127	0.103427	5.18691	0.001912	0.0331568	0.993574	chr10	104415919	N_Shore	TRIM8	NM_030912	Body
cg22956254	-0.115367	-1.26644	0.00191267	0.0369856	0.993574	chr12	7848647	OpenSea	GDF3	NM_020634	TSS1500
cg16810339	0.160349	0.328087	0.00191349	0.0514088	0.993574	chr12	21099804	OpenSea
cg06145862	-0.0545729	4.05178	0.00191401	0.0174968	0.993574	chr16	22338659	S_Shore	POLR3E	NM_018119	Body
cg02307288	-0.0781503	3.67132	0.00191603	0.0250586	0.993907	chr5	135549111	OpenSea	TRPC7;TRPC7;TRPC7	NM_020389;NM_001167577;NM_001167576	3'UTR;3'UTR;3'UTR
cg15538411	-0.0749008	5.54545	0.00191913	0.0240204	0.994805	chr15	74245883	OpenSea
cg07482238	0.0409437	0.739826	0.00192268	0.0131328	0.995808	chr17	71344800	OpenSea	SDK2	NM_001144952	Body
cg02211549	0.111418	3.88884	0.001926	0.0357436	0.995808	chr5	2805677	OpenSea
cg04168829	0.0686282	4.26607	0.00192649	0.022017	0.995808	chr6	90718566	OpenSea	BACH2;BACH2;BACH2;BACH2	NM_021813;NM_001170794;NM_021813;NM_001170794	ExonBnd;ExonBnd;5'UTR;5'UTR
cg11791914	0.0573908	3.5334	0.00192847	0.0184136	0.995808	chr1	4772257	Island	AJAP1;AJAP1	NM_018836;NM_001042478	Body;Body
cg10698419	-0.0706357	5.89295	0.00193041	0.0226654	0.995808	chr4	72897317	N_Shore	NPFFR2	NM_004885	TSS1500
cg05157340	0.103276	-5.27486	0.0019305	0.0331392	0.995808	chr17	67577736	OpenSea
cg07279206	0.0717515	-2.97828	0.001931	0.0230241	0.995808	chr21	40297980	OpenSea	LOC400867	NR_120405	Body
cg08543244	0.112835	5.15243	0.00193206	0.0362093	0.995808	chr7	25216828	N_Shelf	C7orf31	NM_138811	Body
cg09456254	0.105688	3.71027	0.00193368	0.0339183	0.995931	chr21	42520365	OpenSea	C21orf130	NR_024100	TSS1500
cg25943719	0.0888167	0.840786	0.00193614	0.0285074	0.995931	chr15	101421391	S_Shore	ALDH1A3	NM_000693	Body
cg07003542	0.101968	-5.06994	0.00193783	0.0327313	0.995931	chr5	176056682	Island	SNCB;EIF4E1B;SNCB	NM_003085;NM_001099408;NM_001001502	5'UTR;TSS1500;5'UTR
cg20627812	-0.0698846	3.1365	0.00193885	0.0224338	0.995931	chr16	1257184	S_Shelf	CACNA1H;CACNA1H	NM_001005407;NM_021098	Body;Body
cg27224798	0.0545999	5.18304	0.00194242	0.0175304	0.995931	chr14	88641579	OpenSea
cg07899081	0.127438	-8.19442	0.00194243	0.0409166	0.995931	chr1	109968649	Island	PSMA5	NM_002790	Body
cg23264874	0.0761445	1.88659	0.00194487	0.0244507	0.995931	chr13	92210112	OpenSea	GPC5	NM_004466	Body
cg26747079	0.0879112	1.61345	0.00194503	0.0282293	0.995931	chr3	193518745	OpenSea
cg12053155	0.0868583	-5.2613	0.00194554	0.0278919	0.995931	chr13	107186476	Island	EFNB2	NM_004093	Body
cg20272287	-0.072798	4.51726	0.00194604	0.0233774	0.995931	chr17	19247905	Island	MIR1180;B9D1	NR_031591;NM_015681	TSS200;Body
cg22334846	-0.0786355	5.70669	0.00195071	0.0252579	0.996317	chr7	141701468	OpenSea	MGAM	NM_004668	5'UTR
cg09947401	-0.162107	-5.64	0.00195288	0.0520747	0.996317	chr11	12849620	OpenSea	TEAD1	NM_021961	Body
cg19642294	0.0398415	0.141274	0.00195428	0.0127994	0.996317	chr2	42182115	OpenSea	C2orf91	NM_001242815	TSS1500
cg14436231	-0.0665528	4.42711	0.0019545	0.0213809	0.996317	chr17	3563641	OpenSea	CTNS;CTNS	NM_001031681;NM_004937	Body;Body
cg03606843	0.0871599	4.93207	0.00195564	0.0280027	0.996317	chr11	9650767	OpenSea
cg08260658	1.47818	-8.0104	0.00195688	0.474939	0.996317	chr5	132155330	Island
cg15077680	0.0746161	5.20797	0.00195746	0.0239748	0.996317	chr10	93044423	OpenSea
cg09333154	-0.122781	4.86357	0.00196128	0.0394579	0.996317	chr21	17911663	OpenSea	MIRLET7C;MIR99AHG;MIR99AHG;MIR99AHG;MIR99AHG	NR_029480;NR_027790;NR_111005;NR_111004;NR_027791	TSS1500;Body;Body;Body;Body
cg27134390	0.0667992	1.59092	0.00196228	0.0214683	0.996317	chr12	120842386	OpenSea
cg02349334	0.0763822	4.29409	0.00196317	0.0245492	0.996317	chr13	76363851	OpenSea	LMO7;LMO7	NM_015842;NM_005358	5'UTR;Body
cg07009386	0.06083	2.06871	0.00196352	0.019551	0.996317	chr11	79104711	OpenSea	TENM4	NM_001098816	5'UTR
cg05959138	0.0651132	5.7115	0.00196462	0.0209288	0.996317	chr4	169570322	OpenSea	PALLD;PALLD;PALLD	NM_001166109;NM_001166108;NM_016081	5'UTR;Body;Body
cg03035304	-0.0766118	4.77487	0.00196642	0.0246269	0.996317	chr2	128028698	OpenSea	ERCC3;ERCC3;ERCC3	NM_001303416;NM_001303418;NM_000122	Body;Body;Body
cg11861491	-0.0700306	1.35555	0.00196658	0.0225116	0.996317	chr20	30028292	OpenSea	DEFB123	NM_153324	TSS200
cg10730597	-0.0747463	5.84202	0.00196742	0.0240284	0.996317	chr16	28164535	OpenSea	XPO6;XPO6	NM_001270940;NM_015171	Body;Body
cg05620050	-0.179684	5.2604	0.00197011	0.0577701	0.996322	chr6	33374613	N_Shelf	KIFC1	NM_002263	Body
cg14154182	-0.102041	-6.70834	0.0019703	0.0328073	0.996322	chr19	10362775	Island	MRPL4;MRPL4;MRPL4;MRPL4;MRPL4	NM_146388;NM_146387;NM_015956;NM_015956;NM_146388	5'UTR;5'UTR;5'UTR;1stExon;1stExon
cg17928920	-0.117809	-4.79767	0.00197361	0.0378833	0.996322	chr1	968558	Island	AGRN	NM_198576	Body
cg23000309	0.0739394	5.03334	0.00197657	0.0237797	0.996322	chr14	86087847	OpenSea	FLRT2	NM_013231	5'UTR
cg03635578	-0.0644869	3.7463	0.00198076	0.0207439	0.996322	chr16	58082215	S_Shelf
cg10983115	0.0627077	-4.861	0.0019816	0.0201724	0.996322	chr10	114710129	N_Shore	TCF7L2;TCF7L2;TCF7L2;TCF7L2;TCF7L2;TCF7L2;TCF7L2;TCF7L2;TCF7L2;TCF7L2;TCF7L2;TCF7L2	NM_001146284;NM_001146283;NM_001146286;NM_001146284;NM_001146283;NM_001146285;NM_030756;NM_001146274;NM_001146285;NM_001146286;NM_001146274;NM_030756	5'UTR;1stExon;5'UTR;1stExon;5'UTR;1stExon;1stExon;1stExon;5'UTR;1stExon;5'UTR;5'UTR
cg16344560	-0.0648683	1.09081	0.00198192	0.0208678	0.996322	chr12	1744287	OpenSea	WNT5B;WNT5B	NM_032642;NM_030775	Body;Body
cg07391931	-0.0806772	4.00436	0.00198222	0.0259538	0.996322	chr19	11159487	OpenSea	SMARCA4;SMARCA4;SMARCA4;SMARCA4;SMARCA4;SMARCA4;SMARCA4	NM_003072;NM_001128849;NM_001128844;NM_001128847;NM_001128848;NM_001128845;NM_001128846	Body;Body;Body;Body;Body;Body;Body
cg23274604	0.120416	-7.47551	0.00198509	0.0387432	0.996322	chr1	224517835	Island	NVL;NVL;NVL;NVL	NM_206840;NM_206840;NM_002533;NM_002533	1stExon;5'UTR;5'UTR;1stExon
cg11941059	0.0716164	6.26413	0.00198531	0.0230424	0.996322	chr7	91671490	OpenSea	AKAP9;AKAP9;AKAP9;AKAP9	NM_005751;NM_147185;NM_005751;NM_147185	ExonBnd;ExonBnd;Body;Body
cg10213328	0.0885929	-6.25068	0.00198772	0.028508	0.996322	chr17	37309414	S_Shore
cg15347519	-0.178981	-1.05433	0.00198898	0.057597	0.996322	chr20	46912835	OpenSea
cg23889875	0.146526	-6.87873	0.00199054	0.0471564	0.996322	chr7	83278066	OpenSea	SEMA3E;SEMA3E	NM_012431;NM_012431	1stExon;5'UTR
cg02593403	0.0623302	0.960832	0.00199091	0.0200601	0.996322	chr10	102278918	N_Shore	SEC31B	NM_015490	5'UTR
cg06475673	-0.144469	-5.38137	0.00199394	0.0465022	0.996322	chr2	101767056	Island	TBC1D8	NM_001102426	Body
cg05418150	0.0847999	-3.41252	0.00199454	0.0272965	0.996322	chr16	22018727	N_Shore	C16orf52	NM_001164579	TSS1500
cg19161424	0.103818	-2.17652	0.00199612	0.033421	0.996322	chr15	33360901	OpenSea	FMN1	NM_001103184	TSS1500
cg24430201	-0.0626393	5.08596	0.00199749	0.020166	0.996322	chr19	2228815	N_Shore	DOT1L	NM_032482	Body
cg13688620	-0.0715676	6.53154	0.00199811	0.0230411	0.996322	chr15	65948443	OpenSea	SLC24A1;SLC24A1;SLC24A1;SLC24A1;SLC24A1	NM_001254740;NM_001301031;NM_001301032;NM_004727;NM_001301033	3'UTR;3'UTR;3'UTR;3'UTR;Body
cg03449621	0.0927539	3.82313	0.00199819	0.0298621	0.996322	chr15	83351564	S_Shore	AP3B2	NM_004644	Body
cg23785369	0.0814229	6.22154	0.00200131	0.0262181	0.996322	chr6	156171684	OpenSea
cg16365424	0.0825666	4.58138	0.00200272	0.0265881	0.996322	chr1	234700636	OpenSea
cg00387457	0.158328	-7.42104	0.00200331	0.0509863	0.996322	chr20	34639042	S_Shore	LOC647979	NR_027451	TSS200
cg11953417	0.0722635	5.61265	0.00200437	0.0232722	0.996322	chr7	99761767	OpenSea	GAL3ST4	NM_024637	Body
cg23482944	0.100133	4.9148	0.0020067	0.0322512	0.996322	chr12	127745309	OpenSea
cg02919794	-0.0749298	4.96477	0.00201037	0.0241379	0.996322	chr17	80203112	Island	CSNK1D;CSNK1D	NM_001893;NM_139062	Body;3'UTR
cg19021197	0.141231	-4.28288	0.0020164	0.0455094	0.996322	chr17	59476212	Island	TBX2	NM_005994	TSS1500
cg03777405	0.105266	-6.19026	0.00201737	0.0339219	0.996322	chr17	46125833	Island	NFE2L1	NM_003204	5'UTR
cg07473201	-0.107181	5.49966	0.00202042	0.0345441	0.996322	chr22	18231406	Island	BID;BID;BID	NM_001196;NM_197967;NM_197966	Body;5'UTR;Body
cg12587133	0.0598916	6.24066	0.00202113	0.0193035	0.996322	chr4	178532195	OpenSea
cg04620150	-0.0825885	5.10683	0.00202544	0.0266243	0.996322	chr19	1025542	N_Shore	CNN2;CNN2;CNN2;CNN2	NM_004368;NM_001303501;NM_201277;NM_001303499	TSS1500;TSS1500;TSS1500;TSS1500
cg00325599	0.136973	-8.52869	0.00202607	0.0441579	0.996322	chr3	36986513	Island	TRANK1;TRANK1	NM_014831;NM_014831	1stExon;5'UTR
cg01963221	0.194092	-7.50961	0.00202756	0.0625764	0.996322	chr1	46713430	OpenSea	RAD54L;RAD54L;RAD54L	NM_003579;NM_001142548;NM_003579	1stExon;5'UTR;5'UTR
cg01726956	-0.0755358	4.89552	0.00202774	0.0243534	0.996322	chr22	20166546	OpenSea
cg07146507	0.0651065	5.16824	0.00203116	0.0209944	0.996322	chr15	49328626	OpenSea	SECISBP2L	NM_014701	Body
cg08131574	0.101812	4.31396	0.00203547	0.0328371	0.996322	chr1	175133064	OpenSea	KIAA0040;KIAA0040;KIAA0040;KIAA0040	NM_001162895;NM_014656;NM_001162894;NM_001162893	5'UTR;5'UTR;5'UTR;5'UTR
cg15281294	0.107391	-6.71967	0.00203705	0.0346394	0.996322	chr12	120731179	OpenSea
cg24996120	0.13099	2.64285	0.00203718	0.0422516	0.996322	chr15	25237035	OpenSea
cg15187788	-0.0840277	-5.49602	0.00203774	0.0271043	0.996322	chr19	8274098	N_Shore	LASS4	NM_024552	TSS200
cg11757557	-0.131662	-6.63319	0.00203841	0.0424706	0.996322	chr4	100871143	Island	H2AFZ;LOC256880	NM_002106;NR_125923	Body;TSS1500
cg00571641	0.060827	3.23707	0.00203978	0.0196225	0.996322	chr9	121080996	OpenSea
cg25531179	-0.134015	-4.87356	0.0020412	0.0432354	0.996322	chr10	92211458	OpenSea	LOC101926942	NR_110657	Body
cg09252873	0.0944955	5.26209	0.00204131	0.030486	0.996322	chr6	13408910	OpenSea	GFOD1;GFOD1;GFOD1	NM_001242630;NM_018988;NM_001242628	TSS1500;Body;5'UTR
cg13523654	0.0874804	4.46283	0.00204237	0.0282242	0.996322	chr18	24762316	N_Shelf	CHST9	NM_031422	5'UTR
cg08610354	0.083644	4.66751	0.00204243	0.0269865	0.996322	chr10	34520435	OpenSea	PARD3;PARD3;PARD3;PARD3;PARD3;PARD3;PARD3;PARD3	NM_001184786;NM_001184791;NM_019619;NM_001184789;NM_001184790;NM_001184788;NM_001184787;NM_001184785	Body;Body;Body;Body;Body;Body;Body;Body
cg03900257	0.111875	-3.33884	0.00204352	0.0360968	0.996322	chr9	134543900	OpenSea	RAPGEF1;RAPGEF1;RAPGEF1	NM_198679;NM_005312;NM_001304275	Body;Body;Body
cg17764134	-0.0867757	-7.45472	0.00204887	0.0280055	0.996322	chr18	47018856	Island	RPL17-C18orf32;RPL17;SNORD58A;RPL17;RPL17;RPL17;RPL17-C18orf32;SNORD58B;RPL17;RPL17-C18orf32;RPL17;RPL17;RPL17;RPL17;RPL17;RPL17;RPL17	NM_001199356;NM_001199345;NR_002571;NM_000985;NM_001035006;NM_001199340;NM_001199355;NR_002572;NM_000985;NM_001199356;NM_001035006;NM_001199345;NM_001199340;NM_001199344;NM_001199343;NM_001199342;NM_001199341	5'UTR;5'UTR;TSS1500;5'UTR;5'UTR;5'UTR;TSS1500;TSS1500;1stExon;1stExon;1stExon;1stExon;1stExon;TSS200;TSS200;TSS200;TSS200
cg16133940	-0.0919892	-7.58102	0.00205084	0.0296909	0.996322	chr1	85039806	N_Shore	CTBS	NM_004388	Body
cg09946084	0.0806499	5.42784	0.00205096	0.0260311	0.996322	chr10	127381718	OpenSea	LOC283038	NR_033848	Body
cg20211604	0.083763	2.8278	0.00205244	0.0270378	0.996322	chr17	11632341	OpenSea	DNAH9	NM_001372	Body
cg14496252	-0.0742417	4.86523	0.00205307	0.0239651	0.996322	chr3	72195272	OpenSea
cg21241151	0.08337	1.8974	0.00205501	0.0269142	0.996322	chr9	16310954	OpenSea
cg25249394	-0.148002	-8.72693	0.00205663	0.0477829	0.996322	chr8	6692959	Island	GS1-24F4.2;XKR5;XKR5;XKR5	NR_045217;NM_001289973;NM_207411;NM_001289973	TSS200;1stExon;1stExon;5'UTR
cg20873416	0.105293	-7.2186	0.00205904	0.0339982	0.996322	chr6	30737068	OpenSea
cg13576513	0.0878783	4.33291	0.00206158	0.0283785	0.996322	chr20	58384340	OpenSea	PHACTR3;PHACTR3;PHACTR3;PHACTR3;PHACTR3;PHACTR3	NM_001199505;NM_080672;NM_001199506;NM_183246;NM_183244;NM_001281507	Body;Body;Body;Body;Body;Body
cg12887361	-0.221188	3.71258	0.00206202	0.0714296	0.996322	chr14	91642039	OpenSea	C14orf159;C14orf159;C14orf159;C14orf159;C14orf159;C14orf159;C14orf159;C14orf159	NM_001102369;NM_001102368;NM_001102367;NM_001102366;NM_001286471;NM_001286472;NM_001286470;NM_024952	Body;Body;Body;Body;Body;Body;Body;Body
cg19365062	-0.10884	-6.20617	0.00206322	0.0351505	0.996322	chr6	127440000	Island	RSPO3	NM_032784	TSS200
cg07135614	0.0914179	-5.10297	0.00206631	0.0295281	0.996322	chr3	138663230	N_Shore	FOXL2;FOXL2	NM_023067;NM_023067	1stExon;3'UTR
cg13813366	-0.130613	-6.39637	0.0020732	0.0422019	0.996322	chr4	42398518	N_Shore	SHISA3	NM_001080505	TSS1500
cg26074470	0.111304	3.27629	0.00207402	0.0359645	0.996322	chr8	69702426	OpenSea	C8orf34	NM_052958	Body
cg07180133	-0.168293	-3.43982	0.00207424	0.0543792	0.996322	chr17	5689744	OpenSea	LOC339166	NR_040000	Body
cg26740109	0.194984	3.48109	0.00207481	0.0630053	0.996322	chr18	77585428	N_Shore
cg18756863	0.152474	1.53373	0.00207518	0.0492698	0.996322	chr13	50113679	OpenSea	RCBTB1	NM_018191	Body
cg16895719	0.0630245	-2.71254	0.0020753	0.0203656	0.996322	chr8	25899257	N_Shore	EBF2	NM_022659	Body
cg00354771	0.0793897	3.62463	0.00207565	0.0256543	0.996322	chr1	240694053	OpenSea	GREM2;MIR1273E	NM_022469;NR_128706	5'UTR;Body
cg23769140	0.0441001	0.652326	0.00207677	0.0142514	0.996322	chr1	54048110	OpenSea	GLIS1	NM_147193	Body
cg05383783	0.101891	1.41572	0.00207701	0.0329275	0.996322	chr11	2907819	S_Shore	CDKN1C;CDKN1C;CDKN1C	NM_000076;NM_001122631;NM_001122630	TSS1500;TSS1500;TSS1500
cg09902250	0.0985386	0.987459	0.00207721	0.0318444	0.996322	chr10	100802963	OpenSea	HPSE2;HPSE2;HPSE2;HPSE2	NM_001166245;NM_001166244;NM_021828;NM_001166246	Body;Body;Body;Body
cg09666006	0.0737076	-4.68871	0.00207728	0.0238199	0.996322	chr1	55462628	N_Shore
cg02933942	-0.106265	1.14527	0.00207941	0.034345	0.996322	chr20	58103054	OpenSea
cg24878755	-0.116055	-8.42432	0.00208605	0.0375208	0.996322	chr6	139349590	N_Shore	C6orf115	NM_021243	TSS1500
cg14426312	-0.128798	-5.02595	0.00208711	0.0416425	0.996322	chr9	71395063	Island	FAM122A;PIP5K1B;FAM122A	NM_138333;NM_003558;NM_138333	5'UTR;5'UTR;1stExon
cg04314414	0.0759695	4.79857	0.00208819	0.0245635	0.996322	chr1	198883434	OpenSea
cg05349667	-0.145803	0.839764	0.00208976	0.0471463	0.996322	chr20	25731997	OpenSea
cg00125100	0.0722128	0.537386	0.00209006	0.0233509	0.996322	chr14	94642395	S_Shore	PPP4R4;PPP4R4;PPP4R4;PPP4R4	NM_058237;NM_020958;NM_020958;NM_058237	ExonBnd;ExonBnd;Body;Body
cg05986684	0.113258	5.99809	0.00209314	0.0366285	0.996322	chr2	153618725	OpenSea
cg01027532	0.0510153	3.31449	0.00209524	0.0165004	0.996322	chr7	27155974	S_Shore	HOXA3;HOXA3	NM_153631;NM_030661	5'UTR;5'UTR
cg19407816	0.0895302	4.96923	0.00209704	0.0289601	0.996322	chr11	13236874	OpenSea
cg14387626	0.0790468	-0.245875	0.00210178	0.0255747	0.996322	chr14	106331803	N_Shore
cg07432934	0.0899149	3.81597	0.00210428	0.0290944	0.996322	chr20	21734499	OpenSea
cg04259565	-0.120683	5.00615	0.00210538	0.0390521	0.996322	chr6	33968234	OpenSea	MIR1275	NR_031681	TSS1500
cg16429413	0.067898	5.86057	0.0021064	0.0219724	0.996322	chr8	30516687	S_Shore	GTF2E2	NM_002095	TSS1500
cg18303215	-0.173688	-8.16596	0.00210832	0.0562119	0.996322	chr2	44059003	Island	ABCG5	NM_022436	Body
cg24970172	0.0486022	1.70617	0.00211355	0.0157333	0.996322	chr14	77339984	OpenSea
cg00338479	0.0415808	-0.35205	0.00211544	0.0134615	0.996322	chr1	38551357	OpenSea
cg19041778	0.0756539	5.27959	0.00211552	0.0244926	0.996322	chr5	102631888	OpenSea
cg25014412	0.0727325	5.76816	0.00211607	0.0235474	0.996322	chr14	91247332	OpenSea	TTC7B	NM_001010854	Body
cg03423154	-0.0761527	4.62263	0.00211782	0.0246567	0.996322	chr20	3675835	OpenSea	SIGLEC1	NM_023068	Body
cg05799013	-0.111128	-6.95424	0.0021184	0.0359821	0.996322	chr16	3451666	Island	ZNF174;ZNF434;ZNF174;ZNF174;ZNF174	NM_003450;NM_017810;NM_001032292;NM_001032292;NM_003450	1stExon;TSS1500;5'UTR;1stExon;5'UTR
cg20429277	0.0720954	4.92602	0.00212134	0.0233468	0.996322	chr7	148419022	OpenSea	CUL1	NM_003592	5'UTR
cg05599592	0.0812084	4.26485	0.00212155	0.0262981	0.996322	chr13	64430097	OpenSea
cg24786847	0.0715969	5.77052	0.00212205	0.0231862	0.996322	chr15	34261172	OpenSea	AVEN;CHRM5;CHRM5	NM_020371;NM_012125;NM_012125	Body;5'UTR;1stExon
cg06866646	-0.114724	4.21315	0.00212234	0.0371531	0.996322	chr7	30701209	OpenSea	CRHR2;CRHR2;CRHR2;CRHR2;CRHR2	NM_001883;NM_001202482;NM_001202481;NM_001202475;NM_001202483	Body;Body;Body;Body;Body
cg13635516	0.0565297	-1.62368	0.00212245	0.0183071	0.996322	chr20	31123396	N_Shore
cg14826954	0.0993249	-6.86024	0.00212302	0.0321671	0.996322	chr19	53361088	S_Shore	ZNF468;ZNF468;ZNF468;ZNF468;ZNF468	NM_001277120;NM_001008801;NR_102300;NR_102301;NR_102299	TSS200;TSS200;TSS200;TSS200;TSS200
cg26073219	0.0659755	5.56685	0.00212614	0.0213697	0.996322	chr1	90802339	OpenSea
cg10176059	0.086296	-5.8361	0.00212667	0.0279523	0.996322	chr16	85587419	Island
cg02889076	0.142018	-7.46983	0.00212721	0.0460026	0.996322	chr16	80574912	Island	DYNLRB2;DYNLRB2;DYNLRB2;DYNLRB2;DYNLRB2;LOC102724084	NM_130897;NM_130897;NM_001305017;NR_130943;NR_130942;NR_120307	5'UTR;1stExon;Body;Body;Body;Body
cg09185568	-0.0667824	5.52835	0.00212731	0.0216323	0.996322	chr22	33186867	OpenSea	SYN3;SYN3;SYN3	NM_003490;NM_001135774;NM_133633	Body;Body;Body
cg23205005	0.0733333	5.94046	0.00213172	0.0237591	0.996322	chr4	186586814	OpenSea	SORBS2;SORBS2;SORBS2;SORBS2;SORBS2;SORBS2;SORBS2	NM_001145673;NM_001145670;NM_001145671;NM_001145672;NM_003603;NM_001270771;NM_021069	Body;Body;Body;Body;Body;Body;5'UTR
cg19610905	0.169495	-5.46501	0.00213495	0.0549223	0.996322	chr11	61596333	Island	FADS2	NM_004265	Body
cg02714474	-0.0542989	2.81089	0.00213504	0.0175948	0.996322	chr22	27693690	OpenSea
cg23608997	0.058671	-3.77563	0.00213556	0.019012	0.996322	chr19	56152034	Island	ZNF580;ZNF580;ZNF580	NM_001163423;NM_207115;NM_016202	TSS1500;TSS1500;TSS1500
cg17383240	-0.0798947	6.08699	0.00213572	0.0258896	0.996322	chr19	4941528	Island	UHRF1;UHRF1;UHRF1;UHRF1;UHRF1;UHRF1;UHRF1;UHRF1;UHRF1;UHRF1	NM_001290050;NM_013282;NM_001290052;NM_001290051;NM_001048201;NM_001290050;NM_001290052;NM_001290051;NM_001048201;NM_013282	ExonBnd;ExonBnd;ExonBnd;ExonBnd;ExonBnd;Body;Body;Body;Body;Body
cg07436378	0.0681284	3.38037	0.00213682	0.0220779	0.996322	chr6	33868070	OpenSea
cg05216305	-0.0954756	4.42155	0.00213817	0.0309421	0.996322	chr8	21898495	OpenSea
cg11387705	0.0906562	-4.56475	0.00213825	0.0293803	0.996322	chr7	22122473	N_Shore
cg03663629	0.0861903	4.71783	0.00213916	0.0279341	0.996322	chr10	2536759	OpenSea
cg07374015	0.0979631	1.8507	0.00213918	0.0317497	0.996322	chr22	42672245	OpenSea
cg01248010	0.068469	-4.2801	0.00214124	0.0221928	0.996322	chr2	242448543	Island	STK25	NM_006374	TSS1500
cg21099721	-0.126489	-7.12403	0.00214247	0.0410011	0.996322	chr17	33033240	OpenSea
cg10358206	-0.124063	2.28352	0.00214368	0.0402168	0.996322	chr4	47665189	OpenSea	CORIN;CORIN;CORIN	NM_001278585;NM_006587;NM_001278586	Body;Body;Body
cg00124134	-0.0718297	6.11698	0.00214387	0.0232849	0.996322	chr1	40038252	N_Shelf	PABPC4;PABPC4;PABPC4;LOC101929516;PABPC4;PABPC4;PABPC4	NM_001135654;NM_001135653;NM_003819;NR_125979;NM_001135654;NM_001135653;NM_003819	Body;Body;Body;Body;ExonBnd;ExonBnd;ExonBnd
cg11913631	0.076127	5.34114	0.00214481	0.024679	0.996322	chr18	55133064	OpenSea	ONECUT2	NM_004852	Body
cg14656903	0.0613024	1.69432	0.00214547	0.0198738	0.996322	chr9	38244354	S_Shelf
cg15990724	-0.0822278	4.20518	0.00214609	0.0266583	0.996322	chr12	100866802	OpenSea	NR1H4	NM_005123	TSS1500
cg12150406	0.056605	1.95063	0.00215273	0.018357	0.996322	chr18	8708612	S_Shore
cg18403578	0.0738986	5.19489	0.00215397	0.0239666	0.996322	chr6	33278352	N_Shelf	TAPBP;TAPBP;TAPBP	NM_172209;NM_003190;NM_172208	Body;Body;Body
cg14932313	-0.0496288	1.49333	0.00215524	0.0160964	0.996322	chr14	25043420	OpenSea	CTSG	NM_001911	Body
cg19270544	-0.0693132	5.53635	0.00215569	0.0224812	0.996322	chr1	115519224	OpenSea	SYCP1;SYCP1;SYCP1;SYCP1	NR_104211;NM_001282541;NM_001282542;NM_003176	Body;Body;Body;Body
cg25181507	-0.0932358	-5.18794	0.00215632	0.0302413	0.996322	chr7	139168659	Island	KLRG2	NM_198508	TSS1500
cg13021277	-0.138275	-7.12915	0.00215664	0.0448506	0.996322	chr6	12012580	Island	HIVEP1	NM_002114	TSS200
cg15662252	0.105985	4.3282	0.0021577	0.0343786	0.996322	chr17	76463630	OpenSea	DNAH17	NM_173628	Body
cg03185800	0.0574906	3.714	0.00215836	0.0186489	0.996322	chr6	41750478	S_Shore	PRICKLE4	NM_013397	5'UTR
cg03601877	0.0877489	5.11221	0.00215896	0.028465	0.996322	chr2	107573201	OpenSea
cg04560767	0.071356	5.69304	0.00215916	0.0231475	0.996322	chr22	19107491	N_Shore	DGCR2	NM_005137	Body
cg25410105	0.0784655	3.38009	0.00216027	0.0254551	0.996322	chr6	150945640	OpenSea	PLEKHG1	NM_001029884	5'UTR
cg04171624	-0.0721159	5.34566	0.00216183	0.0233968	0.996322	chr1	174415073	OpenSea	RABGAP1L	NM_014857	Body
cg26841538	0.132788	3.11457	0.00216366	0.0430846	0.996322	chr15	101568393	OpenSea	LRRK1	NM_024652	Body
cg23540704	0.0612795	-3.08928	0.00216743	0.0198862	0.996322	chr17	43046275	Island	C1QL1	NM_006688	TSS1500
cg11176287	0.0861735	-2.405	0.0021698	0.0279677	0.996322	chr16	1122630	Island	SSTR5;SSTR5-AS1	NM_001172560;NR_027242	TSS200;Body
cg17961378	-0.114805	-7.45609	0.00217192	0.0372638	0.996322	chr22	39641154	S_Shore	PDGFB	NM_002608	TSS200
cg24447728	0.0642046	0.11946	0.00217243	0.0208402	0.996322	chr2	166451723	OpenSea	CSRNP3;CSRNP3;CSRNP3;CSRNP3	NM_024969;NM_001172173;NM_024969;NM_001172173	ExonBnd;ExonBnd;Body;Body
cg08687057	-0.0601672	3.91106	0.00217418	0.0195312	0.996322	chr8	142207119	OpenSea
cg00552671	0.0761245	5.25841	0.00217522	0.0247124	0.996322	chr14	66135151	OpenSea	FUT8;FUT8;FUT8;FUT8;FUT8	NM_004480;NR_038167;NR_038170;NM_178156;NM_178155	Body;Body;Body;Body;Body
cg18344063	0.13335	4.8722	0.00217645	0.0432921	0.996322	chr12	87232511	OpenSea	MGAT4C;MGAT4C	NM_013244;NM_013244	1stExon;5'UTR
cg26486036	-0.0908992	-1.02808	0.00217692	0.029511	0.996322	chr8	19794619	N_Shelf
cg26274299	0.0688142	3.18995	0.00218498	0.0223491	0.996322	chr2	107450560	OpenSea	ST6GAL2;ST6GAL2;ST6GAL2	NM_001142351;NM_032528;NM_001142352	Body;Body;Body
cg07481115	0.12771	-6.0684	0.00218544	0.0414778	0.996322	chr12	49525683	S_Shore	TUBA1B	NM_006082	TSS1500
cg26978918	0.173667	-6.15125	0.00218567	0.0564042	0.996322	chr10	134836452	S_Shore
cg24639176	-0.110357	4.10614	0.00218572	0.0358424	0.996322	chr6	12753473	S_Shelf	PHACTR1;PHACTR1	NM_001242648;NM_030948	Body;Body
cg26097276	0.0458585	0.103323	0.00218704	0.0148951	0.996322	chr12	99785036	OpenSea	ANKS1B	NM_152788	Body
cg24670913	0.0882749	3.64584	0.00218705	0.0286721	0.996322	chr18	38707165	OpenSea
cg21550585	-0.0769687	6.04871	0.0021872	0.025	0.996322	chr17	74223131	Island	RNF157	NM_052916	Body
cg14887581	0.0483215	3.01955	0.00218857	0.0156961	0.996322	chr7	89384376	OpenSea
cg04483304	-0.0822696	4.44865	0.00218891	0.0267238	0.996322	chr15	68933603	OpenSea	CORO2B;CORO2B;CORO2B	NM_001190456;NM_001190457;NM_006091	5'UTR;5'UTR;Body
cg12630120	0.124521	-4.30594	0.00219062	0.0404516	0.996322	chr14	57279377	S_Shore	OTX2-AS1	NR_029385	TSS1500
cg21293589	-0.141169	-5.13679	0.00219075	0.0458601	0.996322	chr6	163278126	OpenSea	PACRG;PACRG;PACRG	NM_152410;NM_001080378;NM_001080379	Body;Body;Body
cg10451253	0.07485	-5.46329	0.00219183	0.0243169	0.996322	chr17	32907705	Island	TMEM132E;C17orf102	NM_207313;NM_207454	TSS200;TSS1500
cg11070119	0.113593	5.86758	0.00219312	0.0369055	0.996322	chr2	240061475	Island	HDAC4	NM_006037	Body
cg23313331	-0.0961724	4.76618	0.00219559	0.0312492	0.996322	chr18	28652446	OpenSea	DSC2;DSC2	NM_024422;NM_004949	Body;Body
cg16626323	0.0486031	-1.23801	0.00219603	0.0157929	0.996322	chr8	143295167	OpenSea	TSNARE1	NM_145003	3'UTR
cg13797712	0.0769169	1.66622	0.00219727	0.0249944	0.996322	chr10	87738623	OpenSea	GRID1	NM_017551	Body
cg00133909	-0.105195	-5.5239	0.00219747	0.0341839	0.996322	chr15	73977201	Island	CD276;CD276	NM_001024736;NM_025240	5'UTR;5'UTR
cg09419116	0.103294	-6.75846	0.00219826	0.0335674	0.996322	chr18	56806624	Island	SEC11C	NM_033280	TSS1500
cg25985183	0.0664503	2.21619	0.00219942	0.0215954	0.996322	chr10	59477350	OpenSea
cg27502782	-0.0670867	4.38189	0.00219947	0.0218022	0.996322	chr17	18234630	OpenSea	SHMT1;SHMT1;SHMT1	NM_001281786;NM_148918;NM_004169	Body;Body;Body
cg19885393	-0.0802784	5.06646	0.00220233	0.0260927	0.996322	chr3	50185205	OpenSea
cg12949816	-0.0699331	5.64579	0.00220287	0.0227307	0.996322	chr2	27426299	OpenSea	SLC5A6;SLC5A6	NR_028323;NM_021095	Body;Body
cg06658285	0.0704996	5.22536	0.0022033	0.0229153	0.996322	chr3	29685093	OpenSea	RBMS3;RBMS3;RBMS3;RBMS3;RBMS3	NM_014483;NM_001177712;NM_001177711;NM_001003793;NM_001003792	Body;Body;Body;Body;Body
cg09645699	-0.08122	5.58609	0.00220645	0.0264036	0.996322	chr3	12977543	Island	IQSEC1;IQSEC1	NM_001134382;NM_014869	Body;Body
cg15726556	-0.0971301	-6.72084	0.00220723	0.0315769	0.996322	chr3	113466425	S_Shore	NAA50;NAA50;ATP6V1A	NM_025146;NM_001308445;NM_001690	TSS1500;TSS1500;5'UTR
cg09382361	0.0833297	-3.22601	0.00220786	0.0270912	0.996322	chr19	49929291	N_Shore	GFY	NM_001195256	TSS1500
cg24862787	0.125618	2.96708	0.00220802	0.0408396	0.996322	chr4	55499384	OpenSea
cg10282330	0.0700011	1.58328	0.0022084	0.0227585	0.996322	chr4	41722038	OpenSea
cg12381074	-0.0847921	5.52627	0.00221304	0.027573	0.996322	chr7	959759	Island	ADAP1	NM_006869	Body
cg05867158	0.136951	6.18129	0.00221458	0.0445371	0.996322	chr10	678920	Island	DIP2C	NM_014974	Body
cg05043757	-0.116461	-4.57406	0.00221798	0.0378794	0.996322	chr10	54489431	OpenSea
cg04046473	-0.075867	4.86355	0.00222115	0.0246796	0.996322	chr5	178670078	OpenSea	ADAMTS2;ADAMTS2	NM_014244;NM_021599	Body;Body
cg21299372	-0.103832	-7.32878	0.00222574	0.0337836	0.996322	chr8	27169007	Island	TRIM35;PTK2B;PTK2B;PTK2B;PTK2B	NM_171982;NM_004103;NM_173174;NM_004103;NM_173174	TSS200;5'UTR;5'UTR;1stExon;1stExon
cg23436158	0.0887698	3.24694	0.00222575	0.0288828	0.996322	chr15	93199458	S_Shore	FAM174B	NM_207446	TSS1500
cg12659494	0.0836393	-5.45998	0.00222961	0.0272182	0.996322	chr21	38073934	S_Shore	SIM2;SIM2	NM_009586;NM_005069	Body;Body
cg08812784	-0.0789387	5.45793	0.00223067	0.0256897	0.996322	chr10	126075559	N_Shore
cg24597617	-0.103326	4.14791	0.00223479	0.0336324	0.996322	chr8	18533159	OpenSea	PSD3;PSD3	NM_206909;NM_015310	Body;Body
cg20020054	-0.108407	-7.85309	0.00223545	0.0352872	0.996322	chr20	43496376	OpenSea
cg24983186	0.0885474	3.70837	0.00223593	0.0288234	0.996322	chr16	51371876	OpenSea
cg09452984	-0.0707868	4.38376	0.00223729	0.0230435	0.996322	chr3	76620189	OpenSea
cg20972887	0.0519356	1.59351	0.00223943	0.0169084	0.996322	chr20	46599662	OpenSea
cg13577810	0.0724358	-5.37087	0.0022397	0.0235828	0.996322	chr14	23235999	Island	OXA1L	NM_005015	Body
cg26785604	0.0695063	5.47769	0.0022412	0.0226306	0.996322	chr4	3409168	OpenSea	RGS12;RGS12;RGS12	NM_198229;NM_198227;NM_002926	Body;Body;Body
cg14309884	0.147616	-7.2077	0.002242	0.0480641	0.996322	chr7	105162859	Island	PUS7	NM_019042	TSS200
cg22564433	-0.109204	-5.99667	0.0022439	0.0355598	0.996322	chr8	49612450	OpenSea
cg13426316	0.119271	-6.78106	0.00224712	0.0388437	0.996322	chr12	54379466	Island	HOXC10;HOXC-AS3	NM_017409;NR_047506	1stExon;TSS200
cg04912466	0.139872	-7.31341	0.00224985	0.0455582	0.996322	chr11	63742028	Island	COX8A	NM_004074	TSS200
cg17546215	0.0771669	5.53327	0.00225257	0.0251374	0.996322	chr7	70577170	OpenSea
cg26718707	-0.0716014	5.89704	0.00225299	0.0233248	0.996322	chr10	518370	Island	DIP2C	NM_014974	Body
cg21200408	-0.0834447	-4.94618	0.0022538	0.0271839	0.996322	chr20	21378211	Island	NKX2-4	NM_033176	TSS200
cg15705575	0.067987	5.82994	0.00225609	0.0221504	0.996322	chr6	166944768	OpenSea	RPS6KA2;RPS6KA2	NM_021135;NM_001006932	Body;Body
cg25140751	-0.0949217	5.19737	0.00225616	0.0309259	0.996322	chr15	78419875	N_Shelf	CIB2	NM_006383	Body
cg00973176	-0.065362	4.3723	0.00225754	0.0212965	0.996322	chr4	1907235	OpenSea	WHSC1;WHSC1;WHSC1;WHSC1;WHSC1;WHSC1	NM_007331;NM_133334;NM_133331;NM_001042424;NM_133335;NM_133330	Body;Body;Body;Body;Body;Body
cg00747048	0.0613726	0.46085	0.0022581	0.0199972	0.996322	chr16	87849497	OpenSea
cg13713574	-0.169574	-1.9496	0.00225875	0.0552543	0.996322	chr12	9185353	OpenSea
cg23863896	-0.0687909	6.57695	0.00226265	0.0224188	0.996322	chr12	117258827	S_Shore	RNFT2;RNFT2	NM_032814;NM_001109903	Body;Body
cg06086824	0.0740611	2.41426	0.00226415	0.0241379	0.996322	chr9	36051381	OpenSea	RECK	NM_021111	Body
cg13375897	0.0866361	3.70647	0.00227572	0.0282506	0.996322	chr17	79281677	N_Shelf	LINC00482	NR_038080	Body
cg22207584	-0.0617143	2.75471	0.00227739	0.0201255	0.996322	chr2	85416793	OpenSea	TCF7L1	NM_031283	Body
cg04083953	0.114098	-8.15322	0.0022775	0.0372085	0.996322	chr1	91486951	N_Shore	ZNF644;ZNF644;ZNF644;ZNF644	NM_032186;NM_016620;NM_016620;NM_201269	5'UTR;1stExon;5'UTR;5'UTR
cg00093080	-0.0748651	6.33126	0.00227857	0.0244153	0.996322	chr12	117421224	OpenSea	FBXW8;FBXW8	NM_153348;NM_012174	Body;Body
cg21718232	-0.139203	-8.65677	0.00227914	0.0453987	0.996322	chr1	100817882	Island	CDC14A;CDC14A;CDC14A	NM_033313;NM_033312;NM_003672	TSS200;TSS200;TSS200
cg02916173	0.0696532	5.38098	0.00228138	0.0227184	0.996322	chr7	47849458	OpenSea	PKD1L1;C7orf69;C7orf69	NM_138295;NM_001302627;NM_025031	Body;5'UTR;Body
cg05216219	-0.0642868	5.61388	0.0022816	0.0209683	0.996322	chr16	17366317	OpenSea	XYLT1	NM_022166	Body
cg01571580	0.0829587	4.62215	0.00228214	0.027059	0.996322	chr8	124699741	OpenSea	ANXA13;ANXA13	NM_004306;NM_001003954	Body;Body
cg07732644	0.0694383	5.71261	0.00228417	0.022651	0.996322	chr17	3378397	S_Shelf	ASPA;ASPA	NM_000049;NM_001128085	TSS1500;5'UTR
cg26995915	0.092322	5.72347	0.00228558	0.0301176	0.996322	chr10	134823976	N_Shelf
cg05916707	0.121356	-6.71229	0.00228943	0.0395958	0.996322	chr14	37058256	OpenSea
cg01426804	0.0749175	4.75923	0.00229051	0.0244451	0.996322	chr3	183243557	OpenSea	KLHL6	NM_130446	Body
cg23627629	0.0813007	4.71249	0.00229433	0.0265323	0.996322	chr5	129083748	OpenSea	KIAA1024L	NM_001257308	TSS200
cg05385995	-0.136852	-4.22044	0.00229487	0.0446624	0.996322	chr11	86643127	OpenSea	PRSS23;PRSS23;PRSS23	NR_120593;NR_120592;NR_120591	Body;Body;Body
cg03046560	0.136811	-6.25696	0.0022952	0.0446497	0.996322	chr7	155172997	N_Shore
cg18673246	-0.116589	-4.36854	0.00229631	0.0380517	0.996322	chr17	7217969	N_Shore	GPS2	NM_004489	Body
cg06264879	0.068988	6.26871	0.00229634	0.022516	0.996322	chr6	31827971	N_Shelf	NEU1	NM_000434	Body
cg26768142	-0.094437	2.03407	0.00229792	0.0308241	0.996322	chr2	190214990	OpenSea
cg25706474	0.119255	5.33721	0.00229795	0.0389245	0.996322	chr2	239161157	OpenSea	PER2	NM_022817	Body
cg18627662	-0.136522	-3.00874	0.00229901	0.0445626	0.996322	chr7	8300776	N_Shore	LOC100505938;ICA1;ICA1;ICA1;ICA1	NR_125740;NM_022307;NM_001136020;NM_004968;NM_001276478	TSS1500;5'UTR;5'UTR;5'UTR;5'UTR
cg13796802	-0.0795016	-4.56213	0.00229914	0.0259506	0.996322	chr9	35605622	Island	TESK1	NM_006285	1stExon
cg00105116	-0.0764132	4.93409	0.0023002	0.0249436	0.996322	chr20	48937200	OpenSea	LINC01271	NR_109950	Body
cg22953519	0.0621885	4.10934	0.00230587	0.0203052	0.996322	chr11	82766062	OpenSea	RAB30;RAB30;RAB30	NM_001286061;NM_014488;NM_001286060	5'UTR;5'UTR;5'UTR
cg15284256	0.122616	3.92196	0.00230677	0.0400369	0.996322	chr14	76786915	OpenSea
cg17526311	-0.0655358	5.46497	0.00230825	0.0214003	0.996322	chr7	139336417	OpenSea	HIPK2;HIPK2	NM_001113239;NM_022740	Body;Body
cg16238921	0.107566	-7.04555	0.00230841	0.0351254	0.996322	chr8	71581516	Island	XKR9;LACTB2	NM_001011720;NM_016027	TSS200;TSS200
cg26469081	0.0569866	5.93935	0.00231087	0.0186107	0.996322	chr2	175116821	S_Shelf
cg15138902	-0.0716179	4.12876	0.00231316	0.0233913	0.996322	chr17	66959525	OpenSea
cg04164415	0.10395	-6.75389	0.00231482	0.0339539	0.996322	chr18	21199797	Island	ANKRD29	NM_173505	Body
cg05661346	0.0532793	0.209208	0.00231762	0.017405	0.996322	chr14	61801853	OpenSea	PRKCH	NM_006255	Body
cg26915173	0.0918716	5.1039	0.00231934	0.0300144	0.996322	chr13	47120692	OpenSea
cg25169155	0.102732	3.18733	0.00232066	0.0335643	0.996322	chr1	74904636	OpenSea	FPGT-TNNI3K;FPGT-TNNI3K;TNNI3K	NM_001199327;NM_001112808;NM_015978	Body;Body;Body
cg27560775	0.0922993	4.77598	0.00232085	0.0301561	0.996322	chr9	24090577	OpenSea
cg18162373	-0.0654521	6.56742	0.00232144	0.0213851	0.996322	chr1	151395981	OpenSea	POGZ;POGZ;POGZ;POGZ;POGZ	NM_207171;NM_145796;NM_015100;NM_001194938;NM_001194937	Body;Body;Body;Body;Body
cg22619824	-0.0654115	0.870057	0.00232428	0.0213744	0.996322	chr7	116786606	OpenSea	ST7;ST7;ST7OT2	NM_018412;NM_021908;NR_002331	Body;Body;TSS1500
cg00423443	0.118504	-2.45759	0.00232592	0.0387262	0.996322	chr16	82660376	N_Shore	CDH13	NM_001257	TSS1500
cg17365299	0.0622498	5.23538	0.00232636	0.0203431	0.996322	chr7	79246360	OpenSea
cg06727305	-0.0989468	1.19809	0.00232839	0.0323384	0.996322	chr15	37049798	OpenSea	C15orf41;C15orf41;C15orf41	NM_001130010;NM_032499;NM_001290232	Body;Body;Body
cg20841596	0.158005	-8.55667	0.00232892	0.0516415	0.996322	chr1	226736405	Island	C1orf95	NM_001003665	TSS200
cg26819261	-0.0852404	5.08107	0.00232903	0.0278596	0.996322	chr11	61255275	OpenSea	PPP1R32;PPP1R32	NM_145017;NM_001170753	Body;Body
cg23203836	0.0671049	5.36623	0.00233168	0.0219348	0.996322	chr1	233511072	OpenSea	KIAA1804	NM_032435	Body
cg26984490	0.0532793	2.3537	0.00233491	0.0174179	0.996322	chr5	111674480	OpenSea	EPB41L4A	NM_022140	Body
cg16430726	0.0578249	5.69098	0.00233695	0.0189056	0.996322	chr13	41302238	OpenSea	MIR320D1	NR_031723	TSS1500
cg08980237	0.10557	-7.6146	0.00233873	0.0345184	0.996322	chr3	156534860	Island
cg11263675	-0.0776554	5.43868	0.00233905	0.0253914	0.996322	chr1	154303934	S_Shelf	ATP8B2;ATP8B2;ATP8B2;ATP8B2	NM_020452;NM_001005855;NM_020452;NM_001005855	ExonBnd;ExonBnd;Body;Body
cg26992995	0.0698761	3.14782	0.00234145	0.0228501	0.996322	chr15	68676446	OpenSea	ITGA11	NM_001004439	Body
cg22798247	-0.127109	5.00095	0.00234297	0.0415684	0.996322	chr6	32807372	S_Shore	TAP2;TAP2	NM_018833;NM_000544	TSS1500;TSS1500
cg22642690	0.0437084	2.28635	0.00234404	0.0142946	0.996322	chr6	151987913	OpenSea
cg10146402	0.0922443	-2.51991	0.00234551	0.0301699	0.996322	chr19	41102858	Island	LTBP4;LTBP4	NM_001042544;NM_003573	TSS1500;Body
cg16038181	-0.0595892	4.91597	0.00234669	0.0194906	0.996322	chr1	53905714	S_Shore	FLJ40434	NR_002314	TSS200
cg01315447	0.0717943	5.62748	0.00234753	0.0234834	0.996322	chr11	72012188	OpenSea	CLPB;CLPB;CLPB;CLPB	NM_001258393;NM_001258392;NM_030813;NM_001258394	Body;Body;Body;Body
cg24909101	0.0698251	4.18713	0.00235223	0.0228439	0.996322	chr4	89200650	OpenSea	PPM1K	NM_152542	5'UTR
cg07766386	0.0769234	2.94039	0.00235304	0.025167	0.996322	chr1	161002423	OpenSea
cg00315816	-0.101927	5.34529	0.00235545	0.0333508	0.996322	chr7	151490041	OpenSea	PRKAG2;PRKAG2	NM_001040633;NM_016203	5'UTR;Body
cg23573995	0.0610906	3.21078	0.00235687	0.0199903	0.996322	chr5	169725919	OpenSea	LCP2	NM_005565	TSS1500
cg05652886	0.0683379	-4.61532	0.00235822	0.022363	0.996322	chr2	238876315	Island	UBE2F	NM_080678	5'UTR
cg06604568	-0.0692428	5.25653	0.00235948	0.0226603	0.996322	chr5	71712756	N_Shore
cg13482250	0.0715728	5.30563	0.00236119	0.0234246	0.996322	chr5	16886507	OpenSea	MYO10	NM_012334	Body
cg11760644	-0.097661	3.34179	0.00236452	0.0319673	0.996322	chr6	53405057	OpenSea	GCLC;GCLC	NM_001197115;NM_001498	Body;Body
cg19128802	0.074042	4.04277	0.00236608	0.0242377	0.996322	chr6	37790152	S_Shelf	ZFAND3	NM_021943	Body
cg23571452	-0.0924072	4.50804	0.00236952	0.030254	0.996322	chr6	10697433	S_Shelf	PAK1IP1	NM_017906	Body
cg06391109	0.0717401	3.93149	0.00236964	0.0234877	0.996322	chr8	106511768	OpenSea	ZFPM2	NM_012082	Body
cg02104967	-0.323772	5.72724	0.00237116	0.10601	0.996322	chr17	1386368	N_Shelf	MYO1C;MYO1C;MYO1C	NM_001080779;NM_033375;NM_001080950	Body;Body;Body
cg21171130	0.144387	-8.65517	0.0023738	0.0472806	0.996322	chr14	24610583	Island	FAM158A	NM_016049	5'UTR
cg03952109	-0.062516	5.27793	0.00237433	0.0204718	0.996322	chr5	93409932	OpenSea	FAM172A;FAM172A;FAM172A;FAM172A	NR_028080;NM_001163418;NM_001163417;NM_032042	Body;5'UTR;5'UTR;Body
cg17633906	0.0650946	2.48992	0.00238312	0.0213241	0.996322	chr17	79057492	OpenSea	BAIAP2;BAIAP2;BAIAP2;BAIAP2	NM_017450;NM_006340;NM_001144888;NM_017451	Body;Body;Body;Body
cg04756051	0.0745176	3.36591	0.00238363	0.0244114	0.996322	chr6	160908522	OpenSea	LPAL2;LPAL2	NR_028092;NR_028093	Body;Body
cg13257146	0.0765879	5.59276	0.00238443	0.0250905	0.996322	chr3	42076143	OpenSea
cg04929437	-0.0677666	4.92006	0.00238787	0.0222038	0.996322	chr11	61575417	OpenSea	FADS1	NM_013402	Body
cg02842629	-0.113326	-7.066	0.00238951	0.0371339	0.996322	chr19	12267796	S_Shore	ZNF625	NM_145233	TSS1500
cg21762463	0.0789002	-1.74042	0.00239256	0.0258568	0.996322	chr12	110010943	N_Shore	MVK;MVK;MVK;MMAB;MMAB	NM_000431;NM_001301182;NM_001114185;NR_038118;NM_052845	TSS1500;TSS1500;TSS1500;Body;Body
cg08985173	0.0913432	4.60335	0.00239559	0.0299384	0.996322	chr20	40619755	OpenSea
cg06074958	-0.122116	-6.41419	0.00239706	0.0400268	0.996322	chr12	57118908	N_Shore	NACA;NACA;NACA;NACA;NACA;NACA	NM_005594;NM_001113203;NM_001113202;NM_001113201;NM_005594;NM_001113201	1stExon;5'UTR;5'UTR;1stExon;5'UTR;5'UTR
cg24960291	0.0553217	0.0155462	0.0023987	0.0181344	0.996322	chr3	185538892	N_Shelf	IGF2BP2;IGF2BP2	NM_001007225;NM_006548	Body;Body
cg25674341	-0.134925	-6.65374	0.00240091	0.0442324	0.996322	chr11	65769816	Island	BANF1;BANF1;BANF1;BANF1;EIF1AD;EIF1AD;EIF1AD;EIF1AD;EIF1AD;EIF1AD;EIF1AD	NM_001143985;NM_003860;NM_001143985;NM_003860;NM_001242486;NM_001242485;NM_001242484;NM_001242483;NM_001242482;NM_001242481;NM_032325	1stExon;1stExon;5'UTR;5'UTR;TSS200;TSS200;TSS200;TSS200;TSS200;TSS200;TSS200
cg11901954	-0.103566	-7.75891	0.00240118	0.0339523	0.996322	chr1	212209499	S_Shore	INTS7;DTL	NM_015434;NM_016448	TSS1500;Body
cg08021815	0.0773228	4.71368	0.00240123	0.025349	0.996322	chr12	21651324	N_Shelf	RECQL;RECQL	NM_002907;NM_032941	Body;Body
cg01180640	-0.105844	-7.40382	0.00240174	0.0347	0.996322	chr10	120101385	N_Shore	FAM204A;FAM204A	NM_001134672;NM_022063	5'UTR;5'UTR
cg05364570	-0.0590068	4.74284	0.00240369	0.0193464	0.996322	chr16	72984764	OpenSea	ZFHX3;ZFHX3	NM_001164766;NM_006885	Body;Body
cg22253653	0.0713218	4.94855	0.00240382	0.0233842	0.996322	chr11	44320829	OpenSea	ALX4	NM_021926	Body
cg14420123	0.0845542	0.930096	0.00240388	0.0277228	0.996322	chr2	11822690	OpenSea
cg13047382	0.0769572	4.99429	0.00240553	0.0252337	0.996322	chr4	152893915	OpenSea
cg14646548	-0.0785409	4.55943	0.00240601	0.0257535	0.996322	chr9	95640659	OpenSea	ZNF484;ZNF484	NM_031486;NM_001007101	TSS1500;TSS1500
cg03716849	-0.057089	3.32527	0.00240643	0.0187198	0.996322	chr16	67425928	N_Shore	TPPP3;TPPP3	NM_016140;NM_015964	5'UTR;5'UTR
cg13844930	-0.115413	-1.57097	0.00240744	0.0378462	0.996322	chr12	1388508	OpenSea	ERC1;ERC1;ERC1;ERC1;ERC1;ERC1	NR_027946;NR_027948;NR_027949;NM_178039;NM_178040;NM_001301248	Body;Body;Body;Body;Body;Body
cg05969889	0.0884225	5.59278	0.00240912	0.0289974	0.996322	chr6	143418703	OpenSea	AIG1;AIG1;AIG1;AIG1	NM_001286588;NM_001286589;NM_001286587;NM_016108	Body;Body;Body;Body
cg04738496	-0.101113	-6.49857	0.00241069	0.0331612	0.996322	chr16	2021690	N_Shore	TBL3	NM_006453	TSS1500
cg04340430	0.0671534	5.75218	0.0024107	0.0220239	0.996322	chr2	113967479	OpenSea	LOC440839	NR_029399	Body
cg11773558	-0.0912553	3.28777	0.0024123	0.0299304	0.996322	chr19	23942126	S_Shore	ZNF681	NM_138286	TSS1500
cg02398282	0.0721753	4.68688	0.00241448	0.0236746	0.996322	chr13	30281776	OpenSea
cg01386835	-0.0891693	4.23446	0.00241757	0.0292526	0.996322	chr1	100256201	OpenSea
cg18278729	0.0985772	-0.155769	0.00241759	0.032339	0.996322	chr17	1657676	Island	SERPINF2;SERPINF2;SERPINF2	NM_000934;NM_001165921;NM_001165920	Body;Body;Body
cg01740002	0.0671555	5.17626	0.00241909	0.0220322	0.996322	chr2	45475777	OpenSea
cg17807424	0.100956	5.01498	0.00241971	0.0331222	0.996322	chr1	171591293	OpenSea
cg18558073	-0.109414	2.46272	0.00242169	0.0359003	0.996322	chr15	36872349	S_Shore	C15orf41	NM_001130010	Body
cg02263260	-0.0494242	3.2209	0.00242204	0.016217	0.996322	chr16	82658496	N_Shelf
cg27481285	-0.10447	-7.35985	0.00242254	0.034279	0.996322	chr5	145582730	Island	RBM27	NM_018989	TSS1500
cg01635117	0.0948696	3.83274	0.00242593	0.0311334	0.996322	chr13	107512132	OpenSea
cg07128156	-0.0768052	3.84387	0.00242831	0.0252077	0.996322	chr13	74992480	OpenSea	LINC00381	NR_047005	TSS1500
cg19905109	0.0820674	3.69101	0.00242833	0.0269348	0.996322	chr20	57892254	OpenSea	EDN3;EDN3;EDN3;EDN3;EDN3	NM_001302455;NM_001302456;NM_207032;NM_207034;NM_207033	Body;Body;Body;Body;Body
cg01174685	-0.134811	-8.13961	0.00242929	0.0442473	0.996322	chr2	97202321	Island	ARID5A	NM_212481	TSS200
cg07395648	-0.0838259	5.0463	0.00242974	0.0275135	0.996322	chr5	131743802	N_Shelf
cg17552710	0.0559814	-0.102237	0.00243096	0.0183753	0.996322	chr5	139062999	S_Shelf
cg16095615	-0.108076	-8.16109	0.0024361	0.0354824	0.996322	chr11	94277451	Island	FUT4	NM_002033	1stExon
cg02457108	0.0988305	4.68398	0.00243833	0.0324499	0.996322	chr1	230954818	OpenSea
cg13628396	0.0785583	4.78594	0.00243835	0.0257938	0.996322	chr3	64973616	OpenSea	ADAMTS9-AS2	NR_038264	Body
cg12448933	0.125005	-3.47962	0.00243872	0.0410446	0.996322	chr17	72667378	Island	RAB37;RAB37	NM_175738;NM_175738	5'UTR;1stExon
cg26182834	0.0796508	5.13184	0.00243919	0.0261534	0.996322	chr16	46957615	OpenSea	GPT2;GPT2	NM_001142466;NM_133443	Body;Body
cg21249797	0.0694437	5.87047	0.00244006	0.0228027	0.996322	chr1	43662012	OpenSea	CFAP57;CFAP57;CFAP57	NM_001167965;NM_152498;NM_001195831	Body;Body;Body
cg08036514	0.0423308	0.21983	0.00244167	0.0139008	0.996322	chr16	67313600	Island	PLEKHG4;PLEKHG4;PLEKHG4;PLEKHG4;PLEKHG4;PLEKHG4;PLEKHG4	NM_015432;NM_001129731;NM_001129731;NM_001129728;NM_001129729;NM_001129727;NM_015432	1stExon;5'UTR;1stExon;5'UTR;5'UTR;5'UTR;5'UTR
cg11690274	-0.114068	-6.80578	0.00244204	0.0374588	0.996322	chr5	177621248	OpenSea
cg02410538	0.0648922	5.69692	0.00244296	0.0213107	0.996322	chr11	100546042	OpenSea
cg09718739	0.0895912	4.04699	0.00244617	0.0294258	0.996322	chr11	85644485	N_Shore
cg26809041	0.0731847	4.50761	0.00244791	0.0240389	0.996322	chr4	167096245	OpenSea
cg26466508	0.190869	-2.21217	0.00245276	0.0627068	0.996322	chr6	76203597	OpenSea	FILIP1	NM_015687	TSS200
cg16235748	0.120121	-2.11427	0.00245317	0.0394646	0.996322	chr6	149772707	Island	ZC3H12D	NM_207360	Body
cg01783101	-0.198119	4.23891	0.00245361	0.0650911	0.996322	chr7	118498931	OpenSea
cg26688762	0.0834037	1.94819	0.00245492	0.0274034	0.996322	chr5	1763902	OpenSea
cg17229453	-0.049157	1.15409	0.00245558	0.0161516	0.996322	chr2	173730307	OpenSea	RAPGEF4;RAPGEF4;RAPGEF4;RAPGEF4	NM_001282900;NM_001282899;NM_007023;NM_001100397	5'UTR;5'UTR;Body;Body
cg22418152	0.0832268	2.26491	0.00245703	0.0273476	0.996322	chr1	20396518	OpenSea	PLA2G5	NM_000929	TSS200
cg15035610	0.0690819	5.0933	0.00245756	0.0227002	0.996322	chr4	126289166	OpenSea	FAT4;FAT4;FAT4	NM_024582;NM_001291285;NM_001291303	Body;Body;Body
cg02794243	0.0735603	5.18764	0.00245828	0.0241725	0.996322	chr2	3176751	OpenSea
cg27456012	-0.0540671	3.70003	0.00246024	0.0177683	0.996322	chr16	67201719	S_Shore	HSF4;HSF4;HSF4	NM_001040667;NM_001538;NM_001538	Body;Body;ExonBnd
cg01241301	-0.177529	-8.62096	0.00246077	0.0583436	0.996322	chr9	131799210	Island	FAM73B	NM_032809	TSS200
cg11822076	-0.0566268	4.53387	0.00246137	0.0186104	0.996322	chr14	65528044	OpenSea	FNTB;MAX	NM_002028;NM_197957	3'UTR;Body
cg20219329	-0.0922104	-0.373666	0.00246497	0.0303094	0.996322	chr8	1994478	OpenSea	MYOM2	NM_003970	5'UTR
cg02976323	0.0730313	5.07905	0.00246515	0.0240054	0.996322	chr7	140156225	OpenSea	MKRN1;MKRN1	NM_013446;NM_001145125	Body;3'UTR
cg16772374	0.0775347	4.05629	0.00246608	0.0254867	0.996322	chr5	74756988	OpenSea	COL4A3BP;COL4A3BP;COL4A3BP	NM_031361;NM_005713;NM_001130105	Body;Body;Body
cg15777606	0.0823135	5.41048	0.00246733	0.0270589	0.996322	chr6	15496615	N_Shore	JARID2	NM_004973	Body
cg07815027	0.0599638	6.16355	0.00246751	0.019712	0.996322	chr11	75550011	OpenSea	UVRAG	NM_003369	Body
cg27608742	0.0797845	4.16603	0.00246862	0.0262289	0.996322	chr1	216394242	OpenSea	USH2A;USH2A	NM_007123;NM_206933	Body;Body
cg11723960	0.0975764	2.64679	0.00246981	0.0320795	0.996322	chr16	6172597	OpenSea	RBFOX1;RBFOX1;RBFOX1	NM_001142333;NM_018723;NM_001308117	5'UTR;5'UTR;Body
cg00075634	0.0913279	-5.29877	0.00247042	0.030026	0.996322	chr4	185940595	Island	HELT	NM_001029887	Body
cg00111969	-0.157436	1.00189	0.00247194	0.0517637	0.996322	chr2	60669013	OpenSea
cg09016737	0.0766853	4.08294	0.00247245	0.025214	0.996322	chr15	39417475	OpenSea
cg21129261	-0.0812568	5.69904	0.00247408	0.0267189	0.996322	chr11	73689345	OpenSea	UCP2	NM_003355	Body
cg03430264	-0.0617326	4.27726	0.00247427	0.0202991	0.996322	chr16	67005134	OpenSea	CES3;CES3;CES3	NM_024922;NM_001185177;NM_001185176	Body;Body;Body
cg04428305	0.0721073	5.0225	0.0024755	0.0237117	0.996322	chr6	25085161	OpenSea	CMAHP	NR_002174	Body
cg08450106	-0.108687	-6.76354	0.00247576	0.035741	0.996322	chr19	13030084	Island	SYCE2;SYCE2	NM_001105578;NM_001105578	1stExon;5'UTR
cg06746034	0.0979045	2.02419	0.00247615	0.0321957	0.996322	chr16	1458757	S_Shore	UNKL;UNKL	NM_001037125;NM_001193388	Body;Body
cg26533745	0.147387	-7.36943	0.00247774	0.0484709	0.996322	chr4	106816770	Island	NPNT;NPNT	NM_001033047;NM_001033047	1stExon;5'UTR
cg10093833	-0.0585418	4.1894	0.00247854	0.0192532	0.996322	chr1	17942618	OpenSea	ARHGEF10L;ARHGEF10L	NM_001011722;NM_018125	Body;Body
cg16504526	0.0792668	1.04994	0.00247954	0.0260703	0.996322	chr9	73025362	N_Shore	KLF9	NM_001206	Body
cg14979469	-0.105114	-7.79672	0.00248258	0.0345755	0.996322	chr8	67687786	Island	SGK3;SGK3;C8orf44-SGK3;SGK3	NM_013257;NM_170709;NM_001204173;NM_001033578	5'UTR;5'UTR;5'UTR;5'UTR
cg17882795	-0.137188	-6.54379	0.00248305	0.0451266	0.996322	chr1	25071642	Island	CLIC4	NM_013943	TSS200
cg19356943	0.0740691	5.81226	0.00248443	0.0243657	0.996322	chr2	69618507	S_Shelf
cg22789254	-0.045443	2.27903	0.00248571	0.0149496	0.996322	chr1	36550824	S_Shore	TEKT2	NM_014466	Body
cg15770238	0.098826	-3.75478	0.00248584	0.0325115	0.996322	chr2	11822287	OpenSea
cg14459050	0.0589282	2.61627	0.00248588	0.0193861	0.996322	chr2	180764073	OpenSea
cg16922384	0.0661924	3.73321	0.0024859	0.0217759	0.996322	chr15	44037490	N_Shore	CATSPER2P1;PDIA3	NR_002318;NM_005313	Body;TSS1500
cg08320950	0.136169	-7.44965	0.00248845	0.0448014	0.996322	chr10	103577734	Island	KCNIP2-AS1;MGEA5;MGEA5	NR_045118;NM_001142434;NM_012215	TSS1500;1stExon;1stExon
cg07528123	-0.0969852	-7.89426	0.002489	0.03191	0.996322	chr1	28832362	OpenSea	RCC1;SNHG3;SNHG3;RCC1;RCC1	NM_001048199;NR_002909;NR_036473;NR_030726;NR_030725	TSS200;TSS200;TSS200;TSS200;TSS200
cg26268866	0.10179	-7.11578	0.00248925	0.0334912	0.996322	chr19	12893057	N_Shore
cg10323573	0.117596	3.1332	0.00248947	0.038692	0.996322	chr2	63842427	OpenSea
cg18712727	-0.137287	-8.9763	0.00248954	0.0451711	0.996322	chr12	12765149	Island	CREBL2	NM_001310	Body
cg08215191	-0.0968649	-5.62964	0.0024904	0.0318723	0.996322	chr13	51795926	N_Shore	FAM124A	NM_145019	TSS1500
cg02454806	-0.0943365	-4.16985	0.00249223	0.0310426	0.996322	chr14	42075554	N_Shore	LRFN5	NM_152447	TSS1500
cg16376108	0.0682675	-4.12385	0.00249475	0.0224666	0.996322	chr16	54967024	Island	IRX5	NM_005853	Body
cg00714078	-0.143966	-7.57391	0.00249601	0.0473812	0.996322	chr2	135809744	OpenSea	RAB3GAP1	NM_012233	TSS200
cg03741348	0.0546717	-0.733034	0.00249791	0.0179945	0.996322	chr1	32712237	N_Shore	FAM167B	NM_032648	TSS1500
cg21958870	0.0834732	4.17081	0.00249924	0.0274757	0.996322	chr10	3102604	OpenSea
cg23348582	0.0476931	-1.23018	0.00250018	0.0156991	0.996322	chr14	82000250	Island	SEL1L	NM_005065	TSS200
cg23087546	-0.134558	0.18705	0.00250081	0.0442934	0.996322	chr7	83960503	OpenSea
cg25840649	0.102381	-5.36071	0.00250478	0.0337069	0.996322	chr11	44972574	Island	TP53I11;TP53I11;TP53I11;TP53I11	NM_006034;NM_006034;NM_001076787;NM_001076787	5'UTR;1stExon;5'UTR;1stExon
cg27239171	-0.0655041	5.65582	0.0025048	0.0215659	0.996322	chr20	31120098	N_Shelf
cg09938227	-0.123239	-4.76045	0.00250526	0.0405747	0.996322	chr1	156390124	N_Shore	C1orf61	NM_006365	5'UTR
cg22352122	-0.094722	4.73983	0.00250625	0.0311871	0.996322	chr11	453757	S_Shelf	PTDSS2	NM_030783	Body
cg16201822	-0.0464271	4.87908	0.00250724	0.0152867	0.996322	chr19	43970683	S_Shelf	LYPD3	NM_014400	TSS1500
cg25232535	-0.106632	-7.56665	0.00250796	0.0351109	0.996322	chr22	38597847	Island	MAFF;MAFF;MAFF;MAFF	NM_001161573;NM_012323;NM_001161574;NM_001161572	TSS1500;TSS200;TSS200;TSS200
cg00428904	0.0400702	2.53196	0.00250907	0.0131946	0.996322	chr3	170483789	OpenSea
cg15572907	-0.112368	0.277953	0.00251078	0.0370039	0.996322	chr19	40995921	Island	SPTBN4	NM_020971	Body
cg08156927	-0.0743919	5.66823	0.00251335	0.0245005	0.996322	chr16	963866	S_Shore	LMF1	NM_022773	Body
cg00968561	0.0693326	5.03724	0.00251405	0.0228349	0.996322	chr22	40417379	Island	FAM83F	NM_138435	Body
cg22724765	0.0986933	-0.518754	0.00251494	0.032506	0.996322	chr5	43397572	S_Shore	CCL28	NM_148672	Body
cg07283896	-0.175389	-2.19792	0.00251574	0.0577687	0.996322	chr6	11855283	OpenSea
cg19004267	0.103061	-0.999764	0.00251667	0.0339469	0.996322	chr9	1043670	N_Shore
cg02311702	0.0627503	6.3768	0.00251993	0.0206718	0.996322	chr17	73230992	OpenSea	NUP85	NM_024844	Body
cg09610100	-0.0709886	5.53534	0.00252415	0.0233898	0.996322	chr5	109040501	OpenSea	MAN2A1	NM_002372	Body
cg08590601	0.140244	-6.38308	0.00252454	0.0462091	0.996322	chr11	128563634	Island	FLI1;FLI1	NM_002017;NM_001167681	TSS200;5'UTR
cg08485488	-0.120186	2.83377	0.00252654	0.0396034	0.996322	chr7	15882035	OpenSea
cg05956769	0.0947124	4.76157	0.00252703	0.03121	0.996322	chr12	48552248	S_Shore	ASB8	NM_024095	TSS1500
cg23281714	-0.105656	-7.1983	0.00252972	0.03482	0.996322	chr1	24829351	Island	RCAN3	NM_013441	TSS200
cg22164298	-0.183251	-3.69968	0.00253091	0.0603948	0.996322	chr4	114276834	OpenSea	ANK2;ANK2;ANK2	NM_001148;NM_001127493;NM_020977	Body;Body;Body
cg00471903	0.0634979	5.70468	0.00253148	0.0209278	0.996322	chr15	45444918	S_Shore	DUOX1;DUOX1	NM_175940;NM_017434	Body;Body
cg01700078	0.0627272	3.2396	0.00253865	0.0206797	0.996322	chr1	42185277	OpenSea	HIVEP3;HIVEP3	NM_001127714;NM_024503	5'UTR;5'UTR
cg08583273	0.112886	4.36881	0.00253906	0.0372164	0.996322	chr6	167110788	OpenSea	RPS6KA2	NM_001006932	Body
cg03161611	0.0543313	0.840201	0.00253911	0.0179121	0.996322	chr20	56251788	OpenSea	PMEPA1;PMEPA1;PMEPA1;PMEPA1;PMEPA1	NM_199170;NM_199171;NM_001255976;NM_020182;NM_199169	5'UTR;5'UTR;Body;Body;Body
cg09829202	0.0714432	5.84621	0.00254538	0.0235595	0.996322	chr12	132624481	N_Shelf	DDX51	NM_175066	Body
cg17919004	0.0762479	5.13443	0.00254575	0.0251443	0.996322	chr8	49571931	OpenSea
cg02180233	-0.0954633	4.46228	0.00254889	0.0314849	0.996322	chr12	133406309	S_Shore	GOLGA3;GOLGA3	NM_005895;NM_001172557	TSS1500;TSS1500
cg04400654	0.087406	3.9925	0.0025508	0.0288297	0.996322	chr15	96673840	OpenSea	NR2F2-AS1	NR_125738	Body
cg26443922	-0.0556436	4.07947	0.00255197	0.0183541	0.996322	chr16	1449479	Island	UNKL	NM_001037125	Body
cg05324141	0.0678179	5.25153	0.0025559	0.0223733	0.996322	chr17	36985100	S_Shelf
cg19852518	0.0823694	3.35211	0.00255593	0.027174	0.996322	chr5	152423713	OpenSea
cg16922039	0.0606291	-2.46304	0.00255703	0.0200026	0.996322	chr18	12287385	Island
cg13269304	0.0878391	-5.06315	0.00255823	0.0289811	0.996322	chr19	36545669	Island	WDR62;WDR62;THAP8	NM_173636;NM_001083961;NM_152658	TSS200;TSS200;TSS200
cg14339867	-0.0652633	6.41852	0.00255919	0.0215334	0.996322	chr13	114107554	OpenSea	ADPRHL1	NM_138430	1stExon
cg03738444	-0.145913	-1.76727	0.00256017	0.0481455	0.996322	chr4	103495644	OpenSea	NFKB1;NFKB1	NM_003998;NM_001165412	Body;Body
cg07505433	-0.0645658	3.73357	0.0025642	0.0213075	0.996322	chr19	5037219	Island	KDM4B	NM_015015	Body
cg19788186	0.0840812	2.72922	0.002565	0.0277486	0.996322	chr21	39669558	OpenSea	KCNJ15;KCNJ15;KCNJ15	NM_002243;NM_170736;NM_170737	5'UTR;5'UTR;5'UTR
cg26706187	-0.234276	4.14225	0.00256537	0.0773174	0.996322	chr11	115024626	Island
cg03185898	0.0800287	4.81242	0.00256569	0.026412	0.996322	chr11	84567297	OpenSea	DLG2;DLG2;DLG2	NM_001300983;NM_001364;NM_001142699	Body;Body;Body
cg20518066	-0.0538251	4.1877	0.00256753	0.0177652	0.996322	chr19	47861136	OpenSea	DHX34;DHX34	NM_014681;NM_014681	ExonBnd;Body
cg13919902	0.0705312	5.30858	0.00256849	0.0232801	0.996322	chr2	228732646	N_Shelf
cg23076476	0.10816	-2.19133	0.0025719	0.0357049	0.996322	chr11	26353484	N_Shore	ANO3	NM_031418	TSS200
cg10391633	0.0435061	-1.80688	0.00257333	0.0143627	0.996322	chr4	111558464	N_Shelf	PITX2;PITX2;PITX2;PITX2	NM_153427;NM_153427;NM_153426;NM_153426	1stExon;5'UTR;1stExon;5'UTR
cg04230699	0.127182	-5.33764	0.0025743	0.0419884	0.996322	chr12	12849443	S_Shore	GPR19	NM_006143	TSS1500
cg22665696	-0.104449	-7.82766	0.00257472	0.0344839	0.996322	chr10	131768755	Island
cg10958874	-0.0727747	6.20018	0.00257534	0.0240271	0.996322	chr3	188822328	OpenSea
cg24883601	0.0680053	6.42261	0.00257723	0.0224541	0.996322	chr2	240112434	Island	HDAC4	NM_006037	Body
cg21110437	0.0556532	5.60563	0.00257824	0.0183764	0.996322	chr17	2170770	OpenSea	SMG6;SMG6	NM_001256827;NM_017575	TSS1500;Body
cg03656092	-0.0665993	4.99546	0.00257966	0.021992	0.996322	chr17	79163394	N_Shore	AZI1;AZI1	NM_001009811;NM_014984	3'UTR;3'UTR
cg00222963	0.0933273	1.6517	0.00258019	0.0308185	0.996322	chr8	33462278	OpenSea
cg25448378	0.0672043	3.82455	0.00258049	0.0221925	0.996322	chr5	140875873	S_Shelf	PCDHGA8;PCDHGB5;PCDHGA9;PCDHGB6;PCDHGA10;PCDHGB7;PCDHGA11;PCDHGA11;PCDHGA12;PCDHGC3;PCDHGC3;PCDHGC4;PCDHGC5;PCDHGA1;PCDHGA2;PCDHGA3;PCDHGB1;PCDHGA4;PCDHGB2;PCDHGA5;PCDHGB3;PCDHGA6;PCDHGA7;PCDHGB4	NM_032088;NM_018925;NM_018921;NM_018926;NM_018913;NM_018927;NM_032092;NM_018914;NM_003735;NM_032403;NM_002588;NM_018928;NM_018929;NM_018912;NM_018915;NM_018916;NM_018922;NM_018917;NM_018923;NM_018918;NM_018924;NM_018919;NM_018920;NM_003736	Body;Body;Body;Body;Body;Body;Body;Body;Body;Body;Body;Body;Body;Body;Body;Body;Body;Body;Body;Body;Body;Body;Body;Body
cg20236627	0.156916	-7.94452	0.00258123	0.0518189	0.996322	chr6	32977412	S_Shore	HLA-DOA	NM_002119	TSS200
cg21288091	-0.0680021	5.65877	0.00258281	0.022458	0.996322	chr8	105524569	OpenSea	LRP12;LRP12	NM_001135703;NM_013437	Body;Body
cg16847396	-0.0596345	0.362237	0.00258468	0.019696	0.996322	chr8	10489236	OpenSea	RP1L1	NM_178857	5'UTR
cg26358497	-0.0886056	-4.55106	0.00258534	0.0292653	0.996322	chr19	55627728	N_Shore	PPP1R12C	NM_017607	Body
cg19450531	0.0996384	-6.93989	0.00259301	0.0329192	0.996322	chr3	47422572	Island	PTPN23;PTPN23	NM_015466;NM_015466	1stExon;5'UTR
cg01761236	-0.120433	0.944564	0.00259431	0.0397914	0.996322	chr14	102990251	OpenSea
cg19758151	-0.116726	-5.27675	0.00259465	0.0385672	0.996322	chr17	49008556	Island
cg09918581	0.0650153	2.29184	0.00259663	0.0214832	0.996322	chr10	68812190	OpenSea	LRRTM3;LRRTM3;CTNNA3;CTNNA3	NM_178011;NR_111909;NM_013266;NM_001127384	Body;Body;Body;Body
cg16892681	-0.0877292	-6.16067	0.00260045	0.028993	0.996322	chr21	34961251	Island	DONSON	NM_017613	TSS1500
cg05864010	0.0842047	-0.35684	0.00260233	0.0278302	0.996322	chr11	85376948	S_Shore	CREBZF;CREBZF;CREBZF;CREBZF;CREBZF	NR_028025;NR_028027;NR_028026;NM_001039618;NR_028024	TSS1500;TSS1500;TSS1500;TSS1500;TSS1500
cg11787005	-0.105013	-3.20762	0.00260268	0.0347079	0.996322	chr10	92539548	OpenSea	HTR7;HTR7;HTR7	NM_019859;NM_000872;NM_019860	Body;Body;Body
cg25225632	-0.0743611	5.42757	0.00260334	0.0245778	0.996322	chr5	1324090	OpenSea	CLPTM1L	NM_030782	Body
cg24568187	-0.0756067	5.255	0.00260557	0.0249917	0.996322	chr11	6414550	S_Shelf	SMPD1;SMPD1	NM_000543;NM_001007593	Body;Body
cg23257840	-0.201691	-8.54371	0.00260721	0.0666729	0.996322	chr19	57703144	Island	ZNF264;ZNF264	NM_003417;NM_003417	5'UTR;1stExon
cg07653326	-0.143453	-1.14594	0.00260818	0.047423	0.996322	chr2	235529129	OpenSea
cg16991515	-0.147434	-6.77627	0.00260856	0.0487399	0.996322	chr6	27107019	N_Shore	HIST1H2BK;HIST1H4I	NM_080593;NM_003495	3'UTR;TSS200
cg17908503	0.125304	-2.28136	0.00261089	0.0414275	0.996322	chr20	21690789	S_Shore	PAX1;PAX1	NM_001257096;NM_006192	Body;Body
cg24638211	-0.154674	-5.05278	0.00261118	0.0511385	0.996322	chr10	13578926	OpenSea
cg05727225	-0.151012	-6.21987	0.00261178	0.0499291	0.996322	chr11	10327870	Island	ADM	NM_001124	Body
cg03593041	0.073204	4.98944	0.0026147	0.0242061	0.996322	chr13	91369785	OpenSea
cg26804238	0.0672165	5.14702	0.00261551	0.0222269	0.996322	chr1	235037617	OpenSea
cg04053242	-0.0835321	-4.38292	0.0026194	0.0276263	0.996322	chr20	1246772	Island	SNPH	NM_014723	TSS200
cg19725903	-0.070276	-3.07734	0.00262199	0.0232445	0.996322	chr12	14721020	Island	PLBD1	NM_024829	TSS1500
cg10812980	0.0606508	4.29883	0.0026222	0.020061	0.996322	chr12	96754479	OpenSea	CDK17;CDK17	NM_001170464;NM_002595	5'UTR;5'UTR
cg00590960	0.0644915	-5.01697	0.00262294	0.021332	0.996322	chr18	35146726	Island	BRUNOL4;BRUNOL4;BRUNOL4;BRUNOL4	NM_001025089;NM_001025087;NM_020180;NM_001025088	TSS1500;TSS1500;TSS1500;TSS1500
cg10098794	0.0827965	4.82922	0.00262374	0.0273876	0.996322	chr4	115536913	OpenSea	UGT8	NM_001128174	5'UTR
cg21166317	-0.120003	-7.61744	0.00262575	0.0396979	0.996322	chr11	76572113	Island	ACER3	NM_018367	1stExon
cg03547487	0.150185	-6.97127	0.00262903	0.0496887	0.996322	chr7	26240458	Island	CBX3;CBX3;HNRNPA2B1;HNRNPA2B1	NM_016587;NM_007276;NM_002137;NM_031243	TSS1500;TSS1500;TSS200;TSS200
cg16379910	-0.124016	-6.50466	0.0026304	0.0410328	0.996322	chr14	78636730	OpenSea
cg26575445	-0.134313	-7.08808	0.00263098	0.0444407	0.996322	chr3	169756530	Island	GPR160	NM_014373	5'UTR
cg03923933	0.0582438	4.22471	0.00263395	0.0192737	0.996322	chr2	16703353	OpenSea
cg04015725	0.0788807	5.56661	0.00263476	0.0261035	0.996322	chr7	78063689	OpenSea	MAGI2;MAGI2	NM_001301128;NM_012301	Body;Body
cg26626864	0.0776933	4.6093	0.00263684	0.0257127	0.996322	chr1	58479214	OpenSea	DAB1	NM_021080	5'UTR
cg13630901	-0.0817581	5.53029	0.00263768	0.0270588	0.996322	chr11	15224445	OpenSea	INSC;INSC;INSC;INSC;INSC;INSC	NM_001031853;NM_001042536;NM_001278315;NM_001278314;NM_001278313;NM_001278316	Body;Body;Body;Body;Body;Body
cg01204638	0.0735975	5.31995	0.00263923	0.0243594	0.996322	chr17	26344372	OpenSea
cg25390412	0.0883399	3.52982	0.00263976	0.0292394	0.996322	chr7	158167768	OpenSea	PTPRN2;PTPRN2;PTPRN2;PTPRN2;PTPRN2	NM_001308268;NM_002847;NM_130843;NM_130842;NM_001308267	Body;Body;Body;Body;Body
cg16139912	0.0798169	4.70146	0.00264248	0.0264212	0.996322	chr3	30812040	OpenSea	GADL1	NM_207359	Body
cg07477246	0.0638274	6.18717	0.00264916	0.0211338	0.996322	chr8	140814043	OpenSea	TRAPPC9;TRAPPC9	NM_001160372;NM_031466	Body;Body
cg21536671	0.0574527	2.57507	0.00265555	0.0190277	0.996322	chr1	55951958	OpenSea
cg21984020	-0.068956	5.06768	0.00265599	0.0228379	0.996322	chr7	31230577	N_Shelf
cg15470736	0.0682512	0.423767	0.00265669	0.0226051	0.996322	chr7	157056012	OpenSea	UBE3C	NM_014671	Body
cg14791193	-0.0665609	6.09793	0.00265938	0.0220475	0.996322	chr1	16702476	OpenSea	C1orf144;C1orf144	NM_015609;NM_001114600	Body;Body
cg21883293	-0.126786	-4.08408	0.00265947	0.0419963	0.996322	chr11	32334657	OpenSea
cg12100941	-0.109005	-7.2487	0.00265972	0.0361071	0.996322	chr9	135545554	Island	DDX31;DDX31;GTF3C4	NM_138620;NM_022779;NM_012204	1stExon;1stExon;TSS200
cg19697107	0.099363	-4.48563	0.00266406	0.0329187	0.996322	chr9	129676856	Island	RALGPS1;RALGPS1;RALGPS1	NM_001190729;NM_001190730;NM_014636	TSS200;TSS200;TSS200
cg23225454	0.106244	3.96398	0.00266437	0.0351987	0.996322	chr1	865583	N_Shelf	SAMD11	NM_152486	Body
cg27206026	-0.156376	0.305291	0.00266558	0.05181	0.996322	chr16	57907171	OpenSea
cg01317761	0.0706253	4.78538	0.00266629	0.0234	0.996322	chr6	134736296	OpenSea
cg03639240	0.0690927	4.72105	0.00266709	0.0228929	0.996322	chr11	65855285	OpenSea	PACS1	NM_018026	Body
cg03165343	-0.110968	-7.84283	0.00266779	0.0367688	0.996322	chr12	96883268	N_Shore
cg08420789	0.0632645	6.02533	0.00267054	0.0209646	0.996322	chr17	8276052	N_Shelf	KRBA2;KRBA2	NM_213597;NM_001304947	TSS1500;5'UTR
cg12439388	0.0725602	5.45188	0.00267307	0.0240473	0.996322	chr6	30153799	OpenSea	TRIM26	NM_003449	Body
cg25048701	0.0668708	5.57009	0.00267704	0.0221651	0.996322	chr11	71902284	OpenSea	FOLR1;FOLR1;FOLR1;FOLR1	NM_000802;NM_016729;NM_016724;NM_016725	5'UTR;TSS1500;5'UTR;5'UTR
cg14535332	-0.224526	-1.56952	0.00267997	0.0744301	0.996322	chr21	35831954	Island	KCNE1;KCNE1;KCNE1	NM_001127669;NM_000219;NM_001127668	TSS200;5'UTR;TSS200
cg09221037	0.104093	-5.80081	0.00268194	0.0345093	0.996322	chr5	1523205	Island	LPCAT1	NM_024830	Body
cg16777839	-0.109696	-7.42348	0.00268195	0.0363669	0.996322	chr9	139743802	Island	PHPT1;PHPT1;PHPT1;PHPT1	NM_014172;NM_001135861;NM_001135861;NM_014172	1stExon;1stExon;5'UTR;5'UTR
cg10283036	-0.0388421	1.76239	0.00268216	0.0128772	0.996322	chr12	111853088	N_Shelf	SH2B3	NM_005475	5'UTR
cg27105813	0.117329	-5.86921	0.00268397	0.0389006	0.996322	chr15	77363637	S_Shore	TSPAN3;TSPAN3;TSPAN3	NM_001168412;NM_005724;NM_198902	TSS200;TSS200;TSS200
cg24275559	-0.109858	-0.621467	0.00268581	0.036426	0.996322	chr20	25731833	OpenSea
cg03902274	-0.0615697	5.29905	0.0026904	0.0204184	0.996322	chr14	25479863	OpenSea	STXBP6;STXBP6;STXBP6;STXBP6	NM_001304476;NM_001304477;NM_014178;NM_001304476	ExonBnd;5'UTR;5'UTR;5'UTR
cg25320665	0.0703922	4.64463	0.00269079	0.0233446	0.996322	chr11	102668176	OpenSea	MMP1;MMP1	NM_002421;NM_001145938	Body;5'UTR
cg02378329	0.0841136	4.80656	0.00269214	0.0278965	0.996322	chr18	72125957	S_Shore	FAM69C	NM_001044369	TSS1500
cg18527090	-0.069872	4.65447	0.00269222	0.0231733	0.996322	chr20	24099831	OpenSea
cg06566678	0.069715	4.73239	0.00269239	0.0231214	0.996322	chr16	67305560	OpenSea	SLC9A5	NM_004594	3'UTR
cg11640063	-0.174548	-6.97154	0.0026966	0.0578991	0.996322	chr4	7044859	Island	CCDC96;TADA2B	NM_153376;NM_152293	TSS200;TSS1500
cg11867574	-0.084655	5.82408	0.00269915	0.0280835	0.996322	chr11	68575227	OpenSea	CPT1A;CPT1A	NM_001876;NM_001031847	Body;Body
cg03686998	0.12709	-0.53891	0.00270008	0.0421623	0.996322	chr14	106330224	N_Shelf
cg07162257	0.108941	-6.82515	0.00270164	0.0361437	0.996322	chr1	21835692	Island	ALPL	NM_000478	TSS200
cg04202120	0.144173	3.39603	0.00270323	0.0478355	0.996322	chr12	31883115	S_Shore	AMN1;AMN1	NR_004854;NM_001113402	TSS1500;TSS1500
cg02535992	0.0960587	3.18577	0.00270357	0.031872	0.996322	chr8	11601357	OpenSea	GATA4;GATA4;GATA4	NM_001308094;NM_002052;NM_001308093	5'UTR;Body;Body
cg08401557	0.0650184	5.92459	0.00270458	0.0215737	0.996322	chr8	19405517	OpenSea	CSGALNACT1;CSGALNACT1;CSGALNACT1	NR_024040;NM_001130518;NM_018371	Body;5'UTR;5'UTR
cg17421900	-0.167354	-4.04648	0.00270554	0.0555316	0.996322	chr13	37750237	OpenSea
cg26242866	-0.0566442	3.34051	0.00270974	0.0187988	0.996322	chr19	5711310	N_Shore	LONP1	NM_004793	Body
cg01990964	0.086257	3.12011	0.00270978	0.0286265	0.996322	chr11	88438399	OpenSea	GRM5;GRM5	NM_001143831;NM_000842	Body;Body
cg09058747	-0.073984	5.63613	0.00271319	0.0245566	0.996322	chr6	33358564	N_Shore	KIFC1	NM_002263	TSS1500
cg02242080	0.0539856	-3.77986	0.00271341	0.0179189	0.996322	chr9	128469270	Island	MAPKAP1;MAPKAP1;MAPKAP1;MAPKAP1;MAPKAP1;MAPKAP1;MAPKAP1;MAPKAP1;MAPKAP1;MAPKAP1;MAPKAP1;MAPKAP1	NM_001006617;NM_001006619;NM_024117;NM_024117;NM_001006619;NM_001006618;NM_001006620;NM_001006620;NM_001006621;NM_001006618;NM_001006617;NM_001006621	5'UTR;1stExon;5'UTR;1stExon;5'UTR;5'UTR;5'UTR;1stExon;5'UTR;1stExon;1stExon;1stExon
cg21486818	0.361921	-7.72496	0.00271624	0.120142	0.996322	chr9	130331167	Island	FAM129B;FAM129B;FAM129B	NM_022833;NM_022833;NM_001035534	1stExon;5'UTR;Body
cg26040874	-0.0700762	3.65816	0.00271638	0.0232623	0.996322	chr10	45454112	N_Shore	RASSF4;TMEM72-AS1	NM_032023;NR_033842	TSS1500;Body
cg00861868	0.0877718	3.54474	0.00271648	0.0291366	0.996322	chr16	56685315	OpenSea	MT1B	NM_005947	TSS1500
cg07865607	-0.119883	-6.03179	0.00272269	0.0398054	0.996322	chr19	3136076	OpenSea	GNA15	NM_002068	TSS200
cg06820586	0.123042	-8.32724	0.00272379	0.040856	0.996322	chr14	60337013	Island	RTN1	NM_021136	Body
cg15062759	-0.0832008	4.23112	0.00272386	0.0276269	0.996322	chr4	147398379	OpenSea	SLC10A7;SLC10A7;SLC10A7	NM_032128;NM_001029998;NM_001300842	Body;Body;Body
cg18722124	0.0656152	5.02521	0.00272585	0.0217892	0.996322	chr19	30862050	N_Shelf	ZNF536	NM_014717	TSS1500
cg05161305	0.101618	4.46005	0.00272623	0.0337455	0.996322	chr10	16158824	OpenSea
cg01418951	0.0627416	1.44566	0.00272935	0.0208377	0.996322	chr19	2486431	N_Shore
cg22426397	0.082191	-4.95518	0.00273143	0.0272994	0.996322	chr20	48429093	N_Shore	SLC9A8	NM_015266	TSS200
cg27046573	-0.383103	-7.63034	0.00273241	0.127251	0.996322	chr2	98698577	OpenSea
cg23065788	-0.111068	3.52308	0.00273352	0.0368937	0.996322	chr1	53080079	OpenSea
cg01973552	-0.0567532	5.95206	0.00273378	0.018852	0.996322	chr13	115044379	N_Shelf
cg04272187	0.0601745	4.06663	0.00273516	0.0199895	0.996322	chr21	35464748	OpenSea	SLC5A3;MRPS6	NM_006933;NM_032476	5'UTR;Body
cg13147877	-0.0707106	5.39663	0.00273556	0.0234899	0.996322	chr2	202268992	OpenSea	TRAK2	NM_015049	Body
cg17725037	0.113165	4.84624	0.00273677	0.0375947	0.996322	chr8	15653664	OpenSea
cg14245255	0.0974683	5.50419	0.00273681	0.0323802	0.996322	chr7	53432594	OpenSea
cg13644221	0.069552	5.04808	0.00273885	0.0231078	0.996322	chr11	102486227	OpenSea	MMP20	NM_004771	Body
cg18916988	0.0786252	4.15352	0.00273917	0.0261226	0.996322	chr3	100713182	OpenSea	ABI3BP	NM_015429	TSS1500
cg04592353	0.0939668	5.62081	0.00273946	0.0312201	0.996322	chr20	3209092	Island	SLC4A11	NM_032034	Body
cg04876582	0.071731	1.4454	0.00274176	0.0238344	0.996322	chr10	127864751	OpenSea	ADAM12;ADAM12	NM_003474;NM_021641	Body;Body
cg16423375	-0.081866	-5.18989	0.00274258	0.0272028	0.996322	chr5	76937424	S_Shore
cg01365900	0.0710698	5.61824	0.00274408	0.0236167	0.996322	chr13	61025410	OpenSea	TDRD3;TDRD3;TDRD3	NM_001146071;NM_030794;NM_001146070	5'UTR;5'UTR;Body
cg02927042	-0.088067	2.86662	0.00274677	0.0292679	0.996322	chr1	21476669	OpenSea	EIF4G3	NM_003760	5'UTR
cg25977900	-0.0887386	5.133	0.00274734	0.0294917	0.996322	chr1	114842468	OpenSea
cg08358816	0.0761487	2.30467	0.0027478	0.025308	0.996322	chr6	166578088	N_Shore	T;T;T;T	NM_001270484;NM_003181;NM_001270484;NM_003181	ExonBnd;ExonBnd;Body;Body
cg20473731	0.0728869	5.50283	0.002748	0.0242241	0.996322	chr3	4897963	OpenSea
cg06241045	0.0867873	3.64953	0.00274995	0.028846	0.996322	chr4	135855777	OpenSea
cg05254373	0.0758582	4.56525	0.00275244	0.0252158	0.996322	chr11	9289859	S_Shelf
cg12284802	0.0760156	-4.02874	0.00275266	0.0252684	0.996322	chr15	79723655	N_Shore	KIAA1024	NM_015206	TSS1500
cg12055459	-0.0736012	6.02987	0.00275346	0.0244665	0.996322	chr2	97652489	S_Shore	FAM178B	NM_001122646	TSS200
cg09038297	0.0760524	5.08396	0.00275725	0.0252849	0.996322	chr1	161130991	S_Shore	USP21;USP21	NM_012475;NM_001014443	Body;Body
cg24725633	0.0686706	5.11871	0.00275845	0.0228317	0.996322	chr1	220180911	OpenSea	RNU5F-1;EPRS	NR_002753;NM_004446	Body;Body
cg16512854	-0.0717559	4.33266	0.00276129	0.0238601	0.996322	chr1	9754132	S_Shelf	PIK3CD	NM_005026	5'UTR
cg14070867	-0.0653636	5.54974	0.00276296	0.0217359	0.996322	chr6	31591786	S_Shelf	BAT2	NM_080686	Body
cg23952946	-0.0617322	4.69964	0.00276381	0.0205289	0.996322	chr1	217708570	OpenSea	GPATCH2	NM_018040	Body
cg17900076	0.108395	1.72853	0.00276487	0.0360479	0.996322	chr18	5195574	N_Shore	LOC642597	NM_001145194	Body
cg14323210	0.0517966	-1.33032	0.00276677	0.0172268	0.996322	chr7	150778255	Island	FASTK;TMUB1;TMUB1;FASTK	NM_033015;NM_031434;NM_001136044;NM_006712	TSS1500;3'UTR;3'UTR;TSS1500
cg07887899	0.0846233	4.38274	0.00276848	0.0281462	0.996322	chr8	117603256	OpenSea
cg12703880	0.164517	-6.96524	0.00276852	0.0547195	0.996322	chr8	74206281	Island	RDH10;RPL7	NM_172037;NM_000971	TSS1500;TSS1500
cg05876174	0.218492	-4.54423	0.00276955	0.0726747	0.996322	chr5	2747922	N_Shore	IRX2;IRX2	NM_033267;NM_001134222	Body;Body
cg22483686	-0.121781	-6.12107	0.00277143	0.0405097	0.996322	chr12	71039763	OpenSea	PTPRR;PTPRR;PTPRR;PTPRR;PTPRR	NR_073474;NM_130846;NM_001207016;NM_001207015;NM_002849	Body;Body;Body;Body;Body
cg22902123	0.0706521	5.71939	0.00277167	0.0235021	0.996322	chr7	151612113	OpenSea
cg02621481	0.0729557	5.64484	0.00277271	0.0242693	0.996322	chr13	50931836	OpenSea
cg27484423	0.0736015	4.96832	0.00277288	0.0244843	0.996322	chr1	169035554	OpenSea	LINC00970	NR_104091	Body
cg09531498	0.102579	-0.634572	0.00277319	0.0341244	0.996322	chr22	27672057	OpenSea
cg08430395	-0.0771926	4.3437	0.00277503	0.025681	0.996322	chr7	4859763	S_Shelf	RADIL	NM_018059	Body
cg24002150	0.0904309	3.19708	0.00277594	0.0300862	0.996322	chr11	32085932	OpenSea
cg10409299	-0.176641	0.50817	0.00277637	0.0587692	0.996322	chr7	150498843	S_Shore	TMEM176B;TMEM176B;TMEM176B;TMEM176B;TMEM176A	NM_014020;NM_001101314;NM_001101311;NM_001101312;NM_018487	TSS1500;TSS1500;TSS1500;TSS1500;Body
cg09322114	-0.12095	-5.91048	0.00277848	0.0402435	0.996322	chr22	32145425	N_Shore	C22orf30	NM_173566	5'UTR
cg06025035	-0.0765458	5.45133	0.00277893	0.0254695	0.996322	chr2	69424973	OpenSea	ANTXR1	NM_032208	Body
cg25311466	0.0802593	3.3307	0.00277962	0.0267057	0.996322	chr4	6277273	OpenSea	WFS1;WFS1	NM_001145853;NM_006005	5'UTR;5'UTR
cg07191957	-0.0751921	3.73131	0.00278156	0.0250215	0.996322	chr3	195637580	S_Shore
cg15970392	-0.684955	-3.83845	0.00278245	0.227938	0.996322	chr9	85834148	OpenSea
cg13742426	-0.100761	3.04431	0.00278329	0.033532	0.996322	chr17	22021688	OpenSea	MTRNR2L1	NM_001190452	TSS1500
cg05713782	0.104382	-6.7116	0.00278585	0.0347404	0.996322	chr11	94706830	Island	KDM4D;CWC15	NM_018039;NM_016403	TSS200;TSS200
cg16537522	0.0833555	4.60306	0.00278922	0.0277459	0.996322	chr1	222093244	OpenSea
cg27386563	-0.0707421	4.70852	0.00279167	0.0235495	0.996322	chr15	44951894	N_Shelf	SPG11;SPG11	NM_001160227;NM_025137	Body;Body
cg15121959	-0.071431	5.24092	0.00279458	0.0237813	0.996322	chr1	3052866	N_Shelf	PRDM16;PRDM16	NM_022114;NM_199454	Body;Body
cg26232818	0.106618	-6.32064	0.00279494	0.0354966	0.996322	chr11	32457386	S_Shore	WIT1;WT1;WT1;WT1;WT1	NR_023920;NM_024426;NM_024425;NM_000378;NM_024424	Body;TSS1500;TSS1500;TSS1500;TSS1500
cg04018856	0.0645281	3.49256	0.00279671	0.0214848	0.996322	chr3	14877964	OpenSea	FGD5	NM_152536	Body
cg00082912	0.0859173	1.1783	0.00279689	0.0286067	0.996322	chr17	52194268	OpenSea
cg08009902	0.0858902	3.51359	0.00279791	0.0285987	0.996322	chr2	42793517	N_Shelf
cg26614156	-0.0691723	5.82979	0.00279952	0.0230336	0.996322	chr8	40756230	S_Shore	ZMAT4;ZMAT4	NM_024645;NM_001135731	TSS1500;TSS1500
cg09959684	-0.11891	4.64376	0.00280066	0.0395972	0.996322	chr10	5632392	OpenSea
cg06791328	-0.0548047	4.00548	0.00280166	0.0182507	0.996322	chr1	3437025	S_Shore	MEGF6	NM_001409	Body
cg27424773	0.0487787	-1.25371	0.00280251	0.0162445	0.996322	chr6	35031223	OpenSea	ANKS1A	NM_015245	Body
cg27090417	-0.0696331	5.02302	0.00280253	0.0231896	0.996322	chr15	69651089	OpenSea	PAQR5;PAQR5	NM_001104554;NM_017705	5'UTR;5'UTR
cg19141861	0.0806274	-5.85213	0.00280451	0.0268529	0.996322	chr12	120966964	Island	COQ5	NM_032314	TSS200
cg01380042	-0.102997	4.4673	0.00280459	0.0343033	0.996322	chr1	183057376	OpenSea	LAMC1	NM_002293	Body
cg03477112	-0.186342	-4.74006	0.00280462	0.0620613	0.996322	chr10	125034571	OpenSea
cg03682166	-0.133882	-6.78288	0.00280465	0.0445896	0.996322	chr12	16318525	OpenSea
cg21709803	0.16253	-6.74157	0.00280709	0.0541356	0.996322	chr11	61594965	N_Shore	FADS2	NM_004265	TSS1500
cg11966803	0.0694728	5.66034	0.00280812	0.0231409	0.996322	chr13	99158787	OpenSea	STK24;STK24	NM_003576;NM_001032296	Body;Body
cg02744113	-0.129158	-5.66502	0.00281091	0.0430262	0.996322	chr2	73147030	Island	EMX1	NM_004097	Body
cg15321396	-0.0452365	2.33731	0.00281404	0.0150713	0.996322	chr16	67219218	Island	KIAA0895L;EXOC3L	NM_001040715;NM_178516	TSS1500;Body
cg07779047	0.0816977	2.87175	0.00281489	0.0272197	0.996322	chr3	107394557	OpenSea	BBX;BBX;BBX	NM_001142568;NM_001276286;NM_020235	5'UTR;5'UTR;5'UTR
cg23589346	-0.0792479	4.51608	0.00281683	0.0264054	0.996322	chr2	20341593	OpenSea
cg08279757	0.0873618	-5.44024	0.00281733	0.0291095	0.996322	chr12	54694795	OpenSea	NFE2	NM_001136023	TSS200
cg05840031	0.089923	-5.45641	0.00281767	0.0299632	0.996322	chr11	31832353	Island	PAX6;PAX6;PAX6	NM_001127612;NM_000280;NM_001604	5'UTR;5'UTR;5'UTR
cg02925187	-0.164833	-0.0765452	0.00281915	0.054927	0.996322	chr13	114886195	OpenSea	RASA3	NM_007368	Body
cg24545533	0.0905741	2.89435	0.00282135	0.0301843	0.996322	chr9	133721366	OpenSea	ABL1;ABL1	NM_005157;NM_007313	Body;Body
cg04968107	-0.107149	-7.50196	0.00282145	0.035708	0.996322	chr12	49504803	S_Shore	LMBR1L;LMBR1L;LMBR1L	NM_018113;NM_001300750;NM_001300751	TSS200;TSS200;TSS200
[truncated: 34,007 more rows]
